# Supplementary material for: A Pipeline to Determine RT-QPCR Control Genes for Evolutionary Studies: Application to Primate Gene Expression across Multiple Tissues
Source: PLoS One. 2010 Sep 2;5(9):e12545. doi: 10.1371/journal.pone.0012545 (PMC2932733; doi:10.1371/journal.pone.0012545)
Supplement: Table S1 — Complete results from the candidate control genes selection pipeline. (0.94 MB XLS) [file pone.0012545.s001.xls]

## Sheet: Sheet1
gene	combined var rank	combined var score	1-evenness expression Novartis	rank	between species MEAN	rank	between species STDV	rank	within species MEAN	rank	within species STDV	rank	average expression
FLJ31821	1	2.15871e-12	0.0478485	169	0.01344	1	0.0148867	13	0.01194	1	0.00944368	22	3825.62
ZNF297	2	4.18008e-12	0.0493234	189	0.02238	3	0.0062227	1	0.02342	23	0.0129933	51	564.712
RPS6KA4	3	5.36675e-12	0.0775131	595	0.02012	2	0.0101048	3	0.01938	10	0.00878704	20	1141.33
TRPV3	4	8.32736e-12	0.0240771	10	0.02698	5	0.0141722	12	0.02698	33	0.0167648	97	468
RP4-622L5	5	2.51577e-11	0.172114	1955	0.02866	6	0.0186642	27	0.0193	9	0.0070799	7	73.3654
SERPINB13	6	2.68581e-11	0.06882	466	0.04618	48	0.0402971	159	0.02516	28	0.00416809	1	417.269
ASH2L	7	3.00588e-11	0.0786698	615	0.02904	7	0.0292033	81	0.02026	14	0.0111202	41	1249.21
ADPRH	8	3.10026e-11	0.135402	1497	0.04294	34	0.0211767	36	0.02386	24	0.00527712	3	90.6538
ITGA10	9	3.5767e-11	0.0495397	193	0.04256	32	0.0256063	59	0.02686	32	0.0123336	46	774.385
ITK	10	4.04977e-11	0.0772642	587	0.03074	9	0.023633	51	0.02292	19	0.0157409	81	350.173
TBX6	11	4.11986e-11	0.0577126	316	0.03438	14	0.0154096	16	0.02958	45	0.0227788	206	741.962
TPT1	12	4.15403e-11	0.160691	1821	0.03078	10	0.0300411	85	0.01462	4	0.00956227	25	29452.3
GSK3A	13	4.25394e-11	0.039872	94	0.04928	58	0.0231257	48	0.02778	35	0.0168516	98	1650.31
PPP2R5D	14	4.36069e-11	0.0569985	298	0.05034	62	0.0127508	6	0.0427	160	0.0139582	62	1988.71
USP49	15	4.36098e-11	0.0691885	473	0.04964	61	0.0138482	11	0.03424	80	0.0133908	55	432.269
IRF4	16	4.46468e-11	0.0612136	365	0.05372	73	0.0167454	21	0.04326	166	0.00937219	21	647.615
MPHOSPH6	17	4.86671e-11	0.0515368	230	0.03988	26	0.0218878	42	0.03582	101	0.0151025	75	829.769
CD200R	18	4.92236e-11	0.186215	2124	0.0256	4	0.0117028	5	0.03098	50	0.0142417	65	109.481
PRKRIP1	19	5.17429e-11	0.119755	1286	0.03804	20	0.0344156	116	0.02014	13	0.00819439	16	265.385
PLA2G6	20	5.36184e-11	0.0605969	357	0.03986	25	0.0183587	26	0.03566	97	0.0169558	101	1367.27
ATP1B4	21	6.28434e-11	0.207446	2331	0.03166	11	0.0385202	137	0.01682	5	0.00738492	9	136.519
VPS16	22	6.71963e-11	0.0892887	788	0.04718	53	0.0162787	18	0.03586	102	0.0136639	58	416.615
MTVR1	23	6.92969e-11	0.0827866	700	0.03354	13	0.0278137	72	0.0231	21	0.0194238	144	1431.48
RPL34	24	7.29246e-11	0.126742	1393	0.0407	28	0.0218028	41	0.02028	15	0.015988	85	5701.17
MGC40499	25	7.31853e-11	0.102706	1002	0.03786	18	0.0234238	50	0.02938	43	0.0136758	59	819.615
GNG4	26	7.40694e-11	0.0641251	389	0.05872	94	0.0254897	58	0.03736	119	0.0103292	31	1149.5
SNX27	27	7.70675e-11	0.074514	552	0.04178	31	0.0197749	29	0.0331	70	0.018912	140	1293.52
CCBL1	28	7.87299e-11	0.0258759	15	0.09402	298	0.0769344	533	0.01896	7	0.0110938	39	922.154
ZNF133	29	7.9037e-11	0.0227348	6	0.06	102	0.0181594	25	0.04412	175	0.0361631	510	513.019
MGC5242	30	7.94098e-11	0.0449544	137	0.05982	100	0.0256771	60	0.033	69	0.0174266	108	673.596
BM-009	31	8.6394e-11	0.117585	1252	0.04668	50	0.0128605	8	0.03438	83	0.0178013	119	512.654
MYST2	32	9.48803e-11	0.138204	1545	0.04414	37	0.0210051	35	0.0241	25	0.0153638	79	1270.63
FLJ14360	33	9.85079e-11	0.0869484	750	0.0372	17	0.021988	43	0.03286	67	0.021078	171	818.904
LAMA3	34	9.86678e-11	0.137359	1531	0.06414	125	0.0392076	144	0.03246	64	0.00440034	2	307.596
RPL23A	35	1.00522e-10	0.108773	1104	0.05906	97	0.0399173	154	0.02464	26	0.00795538	13	21490
RNASE3L	36	1.0205e-10	0.0515451	231	0.05418	75	0.0270341	69	0.03822	123	0.0176848	114	527.308
KRTHB2	37	1.05725e-10	0.0576089	313	0.03802	19	0.0220708	44	0.04504	186	0.0242814	234	628.077
C1QTNF6	38	1.11732e-10	0.0374894	74	0.0534	69	0.0457944	209	0.02842	40	0.0214442	176	60.25
SH2B	39	1.14362e-10	0.0595416	342	0.05162	66	0.033642	107	0.03418	79	0.0161809	90	768.846
SMARCB1	40	1.214e-10	0.0599294	346	0.0388	22	0.0279356	74	0.03838	126	0.0243501	235	1131.62
SLC9A2	41	1.22737e-10	0.135528	1499	0.02954	8	0.0400632	157	0.01968	12	0.0194437	145	681.269
EIF2B2	42	1.24072e-10	0.0371059	69	0.06122	110	0.0323822	100	0.04642	202	0.0181694	128	1054.92
DEDD	43	1.26851e-10	0.0799408	640	0.06266	116	0.0450332	203	0.028	37	0.0100429	28	899.692
TCF20	44	1.28564e-10	0.0798421	638	0.04614	47	0.0252482	55	0.04244	157	0.0162861	92	910.692
DATF1	45	1.29916e-10	0.090504	805	0.0626	115	0.0435806	192	0.04732	215	0.00556031	4	584.538
FLJ14249	46	1.32771e-10	0.0980574	931	0.05068	64	0.0260863	62	0.03504	90	0.0146158	72	837.288
POM121	47	1.38543e-10	0.0286115	25	0.0781	194	0.0334442	105	0.03562	96	0.0260252	273	667.462
HSPC016	48	1.3963e-10	0.0902793	801	0.0813	208	0.0519518	258	0.0182	6	0.0100611	29	3937.56
RPS27	49	1.40077e-10	0.117645	1254	0.03656	16	0.0284692	78	0.03278	66	0.0174508	109	13634.9
ICK	50	1.44108e-10	0.184041	2098	0.03806	21	0.0226029	46	0.0253	29	0.0179901	123	114.25
BRF2	51	1.4679e-10	0.0421557	108	0.05996	101	0.0665562	412	0.03108	53	0.0140386	63	1316.83
BHC80	52	1.47021e-10	0.314934	3005	0.04762	54	0.0154048	15	0.031	51	0.0102652	30	107.731
ATP5E	53	1.50615e-10	0.0696006	485	0.04352	36	0.0218022	40	0.04012	139	0.0284263	321	3347.75
POLR3F	54	1.69488e-10	0.0912609	822	0.03912	24	0.0311159	94	0.03104	52	0.0245791	241	237.058
FLJ20195	55	1.79327e-10	0.0515073	229	0.06836	145	0.066111	406	0.02786	36	0.0138273	60	585.654
ARHGEF2	56	1.83773e-10	0.0950792	880	0.05624	83	0.028418	77	0.0364	106	0.0166138	95	1797.21
SHFM3	57	1.8479e-10	0.0983623	937	0.08394	227	0.0308192	90	0.0423	156	0.00858487	18	1011.85
STX10	58	1.87253e-10	0.178451	2030	0.04152	30	0.0270329	68	0.02772	34	0.0168648	100	644.481
BTN2A1	59	1.92091e-10	0.0448116	135	0.08416	229	0.0303857	89	0.05476	309	0.0153071	78	902.577
MGC20460	60	2.0171e-10	0.112578	1164	0.0331	12	0.024664	53	0.03644	107	0.0301173	365	33.1346
SNRPC	61	2.03382e-10	0.31266	2994	0.0431	35	0.0471981	223	0.01938	11	0.00825088	17	802.096
SIP1	62	2.2043e-10	0.0353625	62	0.05692	86	0.0383454	136	0.04958	246	0.0288045	332	612.596
PGR1	63	2.24183e-10	0.116831	1231	0.04478	39	0.0301195	86	0.03242	63	0.021944	183	3785.62
TAF6L	64	2.31172e-10	0.0243398	11	0.0829	220	0.0601046	337	0.04256	159	0.022396	193	690.231
KLK3	65	2.32994e-10	0.230082	2531	0.03908	23	0.0513678	251	0.02116	17	0.0119211	44	77.6346
ATP5A1	66	2.46206e-10	0.142116	1593	0.0622	114	0.0240833	52	0.032	56	0.0180724	127	5405.54
PER1	67	2.47164e-10	0.0486308	178	0.06808	144	0.11444	983	0.01896	8	0.017205	104	1565.08
HAX1	68	2.51094e-10	0.0815624	676	0.0579	89	0.0429783	183	0.03434	82	0.0180149	126	1920.65
RPS13	69	2.52554e-10	0.131013	1446	0.04774	55	0.0339472	112	0.03216	59	0.0184949	131	10626.5
PPP2R5B	70	2.56214e-10	0.207797	2336	0.0464	49	0.0260756	61	0.0323	61	0.015777	83	717.385
KRTAP8-1	71	2.66351e-10	0.134289	1480	0.04926	57	0.0269651	66	0.03362	73	0.0222093	189	120.692
NYD-SP20	72	2.77785e-10	0.753826	3530	0.03502	15	0.0454492	207	0.01448	3	0.00799544	14	643.115
FLJ20259	73	2.79521e-10	0.152145	1714	0.0822	215	0.0392646	146	0.02614	30	0.0108891	37	679.135
UBC	74	2.8273e-10	0.0708294	502	0.05928	99	0.0286421	79	0.03646	108	0.0322436	424	39278.5
PCBP3	75	2.91373e-10	0.297311	2934	0.04886	56	0.0101874	4	0.0439	171	0.0224271	196	217.154
POLG	76	2.91571e-10	0.0884572	777	0.04958	60	0.0459738	213	0.03212	58	0.022513	198	306.365
NRP2	77	2.99438e-10	0.0939836	860	0.05724	88	0.0338853	111	0.03664	110	0.0224184	195	612.712
ET	78	3.01904e-10	0.0708344	503	0.09544	309	0.0128025	7	0.08518	893	0.0204776	158	560.923
GABARAP	79	3.08846e-10	0.107935	1087	0.06306	121	0.0863865	655	0.02312	22	0.0113608	42	4998.25
EEF1G	80	3.10758e-10	0.314849	3004	0.0494	59	0.0416164	170	0.02308	20	0.0104018	32	8743.08
COX7C	81	3.10929e-10	0.134848	1492	0.061	108	0.0608138	340	0.02486	27	0.0125025	50	4887.17
ZNF444	82	3.13442e-10	0.0491774	185	0.04416	38	0.0622326	356	0.02944	44	0.0393932	587	1165.87
MGC11266	83	3.15715e-10	0.0971951	914	0.06118	109	0.0761576	526	0.02808	38	0.012415	48	346.558
SKIP	84	3.17221e-10	0.134468	1485	0.04586	42	0.0330378	104	0.03292	68	0.0236512	220	1015.94
RARB	85	3.21629e-10	0.071899	516	0.06304	120	0.0204135	33	0.05634	331	0.0308529	383	497.75
DNAJB12	86	3.24859e-10	0.0519479	236	0.06936	155	0.0689452	442	0.03634	105	0.0179947	124	780.596
FLJ13273	87	3.25157e-10	0.0963624	903	0.055	78	0.0548027	284	0.03014	47	0.0185734	134	325.75
NLGN2	88	3.2572e-10	0.234951	2567	0.05386	74	0.0136756	10	0.04174	152	0.0225485	200	164.385
H3F3A	89	3.26262e-10	0.126588	1389	0.05062	63	0.0354302	122	0.03992	137	0.0180013	125	9743.56
MAN2A2	90	3.33549e-10	0.107323	1079	0.10166	357	0.0625071	361	0.04282	161	0.00571157	5	1154.31
HEL308	91	3.37704e-10	0.112512	1163	0.059	96	0.016769	22	0.05784	352	0.0262279	278	897.462
RNGTT	92	3.42191e-10	0.0558579	283	0.11676	476	0.0504085	243	0.07016	581	0.00741842	10	539.731
RXRB	93	3.52788e-10	0.0979836	930	0.05826	90	0.0491638	234	0.0358	100	0.017558	111	986.5
LSM1	94	3.54698e-10	0.210125	2360	0.04604	46	0.0165102	20	0.04676	207	0.0237483	222	665.712
LOC120526	95	3.55114e-10	0.0958042	892	0.06272	118	0.0357287	123	0.0321	57	0.0257674	269	604.058
ACVR2	96	3.56165e-10	0.0596865	343	0.0667	137	0.0367081	128	0.04754	218	0.0256356	266	774.038
IGHMBP2	97	3.61815e-10	0.0687307	465	0.06052	104	0.058104	315	0.0431	164	0.0173688	107	2015.02
NUDT9	98	3.68664e-10	0.0460884	145	0.08104	206	0.0666123	415	0.04294	162	0.017256	105	655.058
PMSCL1	99	3.80943e-10	0.407074	3256	0.04594	44	0.0224081	45	0.04092	144	0.0111089	40	286.558
FLN29	100	3.84607e-10	0.115621	1205	0.06928	154	0.0377885	131	0.03412	77	0.0186217	136	756.75
SUCLG1	101	3.84736e-10	0.554358	3435	0.065	128	0.00877981	2	0.0345	84	0.0176267	112	1351.88
SFN	102	3.89788e-10	0.113296	1177	0.05634	84	0.0268308	64	0.0477	221	0.0238594	223	1219.56
RIMS2	103	3.92083e-10	0.257586	2726	0.04592	43	0.0215195	37	0.03624	104	0.0212545	174	730.635
PLXND1	104	3.97633e-10	0.118796	1276	0.04562	41	0.027487	71	0.04628	200	0.0288415	334	1001.46
LYPLA2	105	4.07563e-10	0.0513339	227	0.0546	76	0.059405	325	0.03464	85	0.0353356	488	1597.23
CABIN1	106	4.08702e-10	0.0881611	775	0.0892	261	0.0626066	363	0.04186	153	0.00991655	27	1090.69
RNF10	107	4.19043e-10	0.050879	216	0.06284	119	0.0335882	106	0.05332	291	0.036595	520	1434.73
TRIP11	108	4.21584e-10	0.0406187	96	0.12704	573	0.0734547	484	0.0392	131	0.0141882	64	403.692
PLSCR3	109	4.40416e-10	0.257872	2727	0.04286	33	0.0188423	28	0.04198	155	0.025191	258	256.923
KIAA0676	110	4.53707e-10	0.0444703	132	0.10824	417	0.0398785	153	0.04852	233	0.0243597	236	2118.63
ZNF333	111	4.77745e-10	0.0946676	870	0.05848	92	0.0561356	297	0.0372	117	0.0206643	164	419.827
PRPF4	112	4.91444e-10	0.14245	1598	0.06196	112	0.042597	179	0.03686	113	0.017733	117	262.115
FLJ22609	113	4.92141e-10	0.072194	520	0.13672	664	0.0511344	248	0.04432	178	0.0110017	38	411.558
HCFC1R1	114	4.93101e-10	0.179771	2053	0.05568	82	0.0203287	32	0.04392	172	0.0275905	306	836.846
RIN1	115	5.0136e-10	0.0787363	616	0.05526	80	0.0310492	93	0.06128	418	0.0302838	370	615.423
NDUFB4	116	5.11278e-10	0.544857	3429	0.05896	95	0.0199625	30	0.03226	60	0.0123581	47	3699.23
MUS81	117	5.18437e-10	0.0444159	131	0.09956	341	0.104324	849	0.03672	111	0.0153038	77	890.673
COPB2	118	5.21783e-10	0.0342966	58	0.09128	276	0.0515803	255	0.0491	239	0.0329089	436	999.058
RPL19	119	5.25128e-10	0.195033	2219	0.05088	65	0.0175775	24	0.04194	154	0.0358957	504	7015.98
SCAM-1	120	5.34162e-10	0.0889299	784	0.0708	161	0.0281796	76	0.06224	433	0.0241882	231	1021.94
FLJ35779	121	5.38224e-10	0.0930796	843	0.08776	249	0.0280233	75	0.06016	405	0.0195434	146	974.038
NDST4	122	5.44534e-10	0.0891461	786	0.04034	27	0.0337162	108	0.04924	240	0.0456085	767	253.865
GORASP1	123	5.58471e-10	0.0800414	643	0.0894	262	0.0626376	364	0.04742	217	0.0131391	52	664.846
HDAC3	124	5.59846e-10	0.0830459	703	0.09094	274	0.1341	1182	0.02032	16	0.0136037	57	738.096
HCFC1	125	5.62674e-10	0.0673003	445	0.08808	252	0.0812349	583	0.03498	88	0.0167038	96	1061.15
R3HDM	126	5.65444e-10	0.396698	3232	0.05328	68	0.0162418	17	0.04652	203	0.0177054	116	1453.04
PPM1E	127	5.72005e-10	0.219175	2445	0.0537	72	0.0204514	34	0.0473	214	0.0251226	255	153.846
EYA3	128	5.8769e-10	0.161236	1826	0.05262	67	0.0227075	47	0.04998	247	0.03052	377	93.1923
FLJ10439	129	6.00817e-10	0.0815644	677	0.05526	81	0.038577	139	0.05418	299	0.0318918	413	465.077
RPL32	130	6.05006e-10	0.118535	1271	0.0535	71	0.0350776	119	0.046	198	0.0295657	355	11170.4
LIMR	131	6.1131e-10	0.15489	1753	0.06056	105	0.0295154	82	0.03896	130	0.0283401	319	673.135
TIAL1	132	6.31585e-10	0.137963	1539	0.046	45	0.0342794	115	0.04018	140	0.0361312	508	536.327
FLJ30313	133	6.38464e-10	0.174226	1985	0.04668	51	0.0470043	221	0.0336	72	0.0248561	247	423.923
PHTF1	134	6.39468e-10	0.0735737	539	0.08672	243	0.0431997	186	0.05646	334	0.0205481	161	691.154
TCFL4	135	6.6048e-10	0.0554714	274	0.06066	106	0.0408911	164	0.05636	332	0.0425896	673	942.462
GBF1	136	6.80592e-10	0.0197567	3	0.11358	455	0.106209	871	0.04874	236	0.0292982	345	819.635
TCEB3	137	6.84495e-10	0.0488791	180	0.1234	536	0.0680027	430	0.05726	341	0.0145737	71	1173.77
SPATA2	138	6.9554e-10	0.094894	878	0.10588	393	0.0432115	187	0.03702	116	0.0216396	178	781.923
PDE5A	139	6.96418e-10	0.227432	2512	0.04076	29	0.0279301	73	0.03502	89	0.0384072	565	121.212
MRPS22	140	6.98661e-10	0.059028	333	0.1138	458	0.0324224	102	0.05552	318	0.0288927	336	1099.71
ART1	141	7.09413e-10	0.120162	1289	0.08168	211	0.0252212	54	0.06066	412	0.0236246	219	805.558
RPL41	142	7.40097e-10	0.103915	1021	0.13858	683	0.257004	2152	0.01342	2	0.00745131	11	18737.7
FBS1	143	7.54357e-10	0.171196	1945	0.06386	123	0.045948	212	0.04588	197	0.0163674	93	686
RPS20	144	7.62009e-10	0.194893	2216	0.10634	399	0.0465789	218	0.03726	118	0.0105938	34	11541.2
DAP13	145	7.7151e-10	0.0575728	312	0.1021	361	0.0561873	299	0.05102	256	0.0228947	209	2326.19
PIK3R2	146	7.78972e-10	0.0823859	687	0.06076	107	0.0348877	118	0.06574	502	0.0339285	457	804.115
RPL37	147	7.80679e-10	0.12525	1370	0.07584	184	0.0232098	49	0.05208	269	0.0339994	459	6047.85
PPOX	148	7.842e-10	0.033852	55	0.10156	356	0.0439159	197	0.08084	805	0.0321283	420	567.673
TRIM3	149	7.94689e-10	0.0721189	518	0.10338	371	0.0713514	459	0.05134	260	0.0145502	70	632.75
FLJ21125	150	8.0042e-10	0.0555747	276	0.06482	127	0.0434272	188	0.05142	261	0.0497569	900	258.404
ZNF212	151	8.32417e-10	0.0981266	932	0.0805	205	0.0290557	80	0.0676	533	0.0268284	287	583.615
CHD6	152	8.41962e-10	0.0323943	50	0.13164	619	0.0622849	357	0.06876	554	0.0230533	211	675.481
ENTH	153	8.45007e-10	0.0470103	161	0.15972	867	0.0690116	444	0.06092	416	0.0133857	54	937.75
PAPOLG	154	8.45895e-10	0.265305	2772	0.07066	160	0.0168546	23	0.05476	308	0.0244472	238	152.269
LOC51244	155	8.48819e-10	0.0691301	471	0.06642	136	0.0852571	640	0.03478	86	0.0311749	389	509.481
RNPC1	156	8.54786e-10	0.210909	2370	0.06146	111	0.077731	542	0.0314	54	0.0135102	56	488.712
GNA12	157	8.60463e-10	0.0507976	215	0.11458	465	0.0546201	280	0.05578	321	0.0242641	232	467.423
AP3B1	158	8.664e-10	0.0660955	423	0.09446	300	0.0421172	173	0.05798	357	0.0284168	320	1122.96
DVL2	159	8.80187e-10	0.041022	98	0.0738	171	0.0484349	228	0.06224	434	0.048227	844	760.769
KIAA1354	160	8.81671e-10	0.11667	1227	0.09992	344	0.0272641	70	0.06258	439	0.0221658	188	910.481
SF3A1	161	8.90738e-10	0.0872503	761	0.07282	167	0.0308665	91	0.0659	509	0.0344647	469	1172.13
EEF2	162	8.95348e-10	0.112931	1169	0.0836	225	0.0867676	657	0.02924	42	0.0186918	138	13183.9
C11ORF4	163	9.08863e-10	0.0979763	929	0.07428	177	0.0772797	537	0.04114	146	0.0196423	147	843.577
RPL9	164	9.15388e-10	0.0809813	662	0.1049	379	0.100389	810	0.02146	18	0.0250117	253	9892.29
GPR4	165	9.19863e-10	0.203169	2294	0.05342	70	0.0398778	152	0.0358	99	0.0296868	358	365.538
CRK7	166	9.23921e-10	0.181424	2069	0.0734	170	0.0520359	259	0.03956	135	0.0168539	99	163.942
RPL31	167	9.27469e-10	0.0888536	781	0.07428	176	0.0569761	306	0.04568	193	0.0269991	290	13763.3
RPL6	168	9.32607e-10	0.168206	1908	0.06866	148	0.0338794	110	0.05284	287	0.0225564	201	3113.17
PRKR	169	9.35968e-10	0.158904	1805	0.07546	183	0.0459016	211	0.03542	94	0.0240076	224	484.885
ATP5H	170	9.41686e-10	0.183725	2097	0.06268	117	0.02698	67	0.04908	238	0.03088	384	3655.31
CENPB	171	9.52535e-10	0.159012	1808	0.0927	286	0.0133269	9	0.06348	451	0.0381963	560	391.692
ITSN2	172	9.52733e-10	0.0475103	166	0.1353	650	0.0743942	500	0.07978	777	0.0124873	49	714.577
COX6C	173	9.5819e-10	0.0652287	407	0.06846	146	0.0459749	214	0.04582	196	0.0509349	925	6478.83
SPPL3	174	9.59675e-10	0.0357884	64	0.09548	310	0.0668844	421	0.05458	304	0.0384703	567	880.577
MCM2	175	9.62735e-10	0.242668	2637	0.06728	139	0.0571921	309	0.0341	76	0.0151194	76	439.635
COX5A	176	9.62933e-10	0.559191	3441	0.09284	288	0.0150666	14	0.03824	124	0.0160984	88	3131.25
HDGF	177	9.64445e-10	0.135905	1506	0.09564	311	0.0648047	384	0.04718	212	0.0121354	45	2077.37
CHST1	178	9.64675e-10	0.305487	2957	0.05694	87	0.0201123	31	0.05128	259	0.0268892	288	1009.81
ACTR8	179	9.69251e-10	0.0602844	353	0.09396	297	0.0982474	782	0.03014	48	0.0288961	338	386.231
SAFB	180	9.82654e-10	0.0786355	614	0.06624	135	0.0484672	230	0.0546	305	0.0356481	497	804.038
IMMT	181	9.91433e-10	0.0665022	431	0.09974	343	0.0516421	256	0.0576	346	0.0251274	256	1203.87
SRP14	182	1.00582e-09	0.072868	528	0.06848	147	0.0708662	457	0.04362	169	0.0326069	430	4008.23
FLJ23560	183	1.00949e-09	0.117748	1259	0.07752	190	0.057435	310	0.0479	226	0.0201019	154	154.077
KIAA0586	184	1.01213e-09	0.0689822	469	0.10668	402	0.161	1440	0.02992	46	0.0142773	68	840.827
MBD3	185	1.01453e-09	0.125535	1376	0.09168	282	0.0253975	56	0.06588	506	0.026345	281	1295.4
LOC150678	186	1.01674e-09	0.0897936	797	0.09946	338	0.0254741	57	0.07296	631	0.0306301	381	490.808
MGC4189	187	1.02569e-09	0.0299531	35	0.11834	492	0.0723791	469	0.0542	300	0.0368845	526	1314.63
COX4I1	188	1.02676e-09	0.324793	3044	0.0601	103	0.0216877	39	0.04124	148	0.0294085	348	10839.5
SUI1	189	1.02884e-09	0.0983341	936	0.09788	326	0.0395593	150	0.05928	390	0.0227934	207	12827.4
PACS1	190	1.04019e-09	0.0426991	112	0.09944	337	0.0769962	535	0.05278	284	0.0301447	366	376.577
PPP2R2A	191	1.06738e-09	0.0353673	63	0.08712	246	0.0668835	419	0.05708	339	0.0453744	761	1161.67
GSS	192	1.09063e-09	0.0826994	694	0.0738	172	0.0599476	333	0.04524	191	0.0329489	438	815.827
NRIP3	193	1.09267e-09	0.17107	1942	0.05506	79	0.0496955	239	0.03616	103	0.0322812	425	1211.5
ZNFN1A4	194	1.10262e-09	0.0682572	457	0.10528	384	0.0668037	417	0.0494	244	0.0232497	213	350.731
HSGT1	195	1.10958e-09	0.127513	1407	0.07588	186	0.0499368	241	0.04324	165	0.0265574	282	446.712
RAB2B	196	1.12255e-09	0.0477318	168	0.08494	232	0.061389	345	0.05794	356	0.0389252	579	1346.38
XPO5	197	1.12597e-09	0.170353	1932	0.07262	164	0.0555907	290	0.0442	176	0.018523	133	299.269
SCOTIN	198	1.13806e-09	0.0391875	86	0.11812	489	0.0835103	608	0.05208	270	0.0282682	317	1624.6
FLJ10081	199	1.18461e-09	0.108648	1100	0.06902	151	0.0469648	220	0.04506	188	0.0373276	536	79.7885
NFYC	200	1.2096e-09	0.059957	347	0.10492	380	0.0380393	134	0.06968	570	0.0362759	512	857.827
MGC9850	201	1.22724e-09	0.175486	1992	0.09846	331	0.0324375	103	0.05242	275	0.020888	168	835.173
RPS11	202	1.23216e-09	0.210293	2364	0.06542	134	0.0322055	99	0.04578	195	0.0303767	371	16338.1
COX6A1	203	1.24038e-09	0.247528	2666	0.05476	77	0.0364019	126	0.04066	142	0.0309164	386	8156.29
FLJ14775	204	1.24177e-09	0.312426	2991	0.05858	93	0.0542105	274	0.02858	41	0.0218984	181	654.885
WINS1	205	1.24673e-09	0.0804763	652	0.1402	700	0.0945261	745	0.0377	121	0.0155053	80	555.942
OS-9	206	1.25055e-09	0.104456	1031	0.07788	191	0.0534802	270	0.04448	180	0.0323145	427	2635.96
NACA	207	1.25162e-09	0.122651	1327	0.08764	248	0.04965	237	0.03954	134	0.0296589	357	5298.4
DKFZP434I116	208	1.2658e-09	0.0316186	45	0.10702	404	0.0458352	210	0.08012	786	0.050937	926	1397.08
MMS19L	209	1.26816e-09	0.0605884	356	0.09076	272	0.0754566	512	0.0506	255	0.0302036	367	745.308
RGS19	210	1.27009e-09	0.061154	363	0.07486	179	0.0456623	208	0.0583	367	0.0521135	957	649.981
RPLP1	211	1.27021e-09	0.419071	3282	0.05646	85	0.0530073	266	0.02832	39	0.0178827	121	11434.8
SF3B3	212	1.29057e-09	0.137739	1537	0.08044	204	0.0371589	129	0.04872	234	0.0321736	422	560.365
SS18L2	213	1.29989e-09	0.104625	1037	0.06892	149	0.0624679	360	0.0467	205	0.0309005	385	757.731
KCNH7	214	1.30174e-09	0.0602181	351	0.07018	157	0.0549488	287	0.06346	450	0.0441714	717	625.135
ADPRTL2	215	1.305e-09	0.0247765	13	0.14778	744	0.0759791	524	0.07224	618	0.0324712	429	1927.1
GNAQ	216	1.3076e-09	0.179757	2051	0.0824	217	0.084876	632	0.03652	109	0.0142417	66	1918.96
HKR2	217	1.319e-09	0.361975	3143	0.06754	140	0.0315285	96	0.04034	141	0.021212	173	55.3462
FLJ10815	218	1.34149e-09	0.0732427	534	0.06786	143	0.0657699	400	0.058	358	0.035381	491	727.75
RABGEF1	219	1.34462e-09	0.100461	962	0.08618	242	0.0569657	305	0.06526	493	0.0208905	169	656.269
FLJ20542	220	1.35873e-09	0.104478	1032	0.0691	153	0.0396989	151	0.0586	376	0.0404546	607	1423.17
ZFPL1	221	1.36291e-09	0.0854569	726	0.07654	188	0.038544	138	0.06522	492	0.0414484	642	420.962
ATP6V1F	222	1.36721e-09	0.0907553	812	0.089	260	0.0789777	560	0.03516	91	0.0304815	374	3568.04
BRAF	223	1.37838e-09	0.100872	972	0.07284	168	0.0419339	172	0.05424	301	0.0412439	637	533.481
DCLRE1C	224	1.40434e-09	0.0644944	397	0.07404	174	0.0441115	199	0.08182	827	0.0407463	620	530.788
PTE1	225	1.40473e-09	0.0988368	944	0.08296	221	0.070652	453	0.05024	249	0.0241349	229	739.827
TOMM40	226	1.42428e-09	0.120542	1292	0.05838	91	0.0423473	178	0.05336	292	0.0447885	741	1069.65
LOC201895	227	1.46941e-09	0.0434575	124	0.08234	216	0.0580448	313	0.07854	746	0.0450432	750	1491.94
NEK9	228	1.47237e-09	0.211437	2380	0.12504	554	0.0517988	257	0.0562	327	0.00956635	26	512.385
FLJ12455	229	1.47568e-09	0.0937631	857	0.13192	625	0.216391	1908	0.02628	31	0.0104906	33	531.596
CTCF	230	1.48748e-09	0.134405	1483	0.0952	307	0.0379373	132	0.05966	396	0.0256842	268	713.327
KIAA0406	231	1.4957e-09	0.110411	1131	0.085	235	0.0652743	391	0.04514	190	0.0270473	292	355.192
OSBP	232	1.54764e-09	0.0848891	716	0.07792	192	0.0523387	261	0.05278	283	0.0423538	669	825.885
NFAM1	233	1.56272e-09	0.193588	2207	0.06778	142	0.0422425	176	0.06374	456	0.0221184	185	1068.71
FLJ10902	234	1.58106e-09	0.0926576	840	0.06504	130	0.0515409	254	0.05348	295	0.0475946	830	281.75
HMGN2	235	1.60336e-09	0.156898	1780	0.09456	302	0.0405376	161	0.04874	235	0.0273513	297	4175.65
NET-7	236	1.62037e-09	0.114889	1195	0.0886	255	0.0215314	38	0.07518	665	0.0491751	879	330.346
MGC29816	237	1.62045e-09	0.0653548	410	0.08968	263	0.0831303	605	0.0446	181	0.0372893	535	581.558
MGC2803	238	1.6267e-09	0.138493	1553	0.07412	175	0.0319992	98	0.05552	317	0.0446038	737	1859.69
APOBEC3C	239	1.64743e-09	0.181807	2074	0.06508	131	0.0596819	329	0.04168	150	0.0279894	313	324.519
NCSTN	240	1.66609e-09	0.143149	1606	0.08878	256	0.0708643	456	0.03426	81	0.0270021	291	619.673
ADAM21	241	1.67358e-09	0.0480942	173	0.10088	351	0.0393408	147	0.095	1082	0.0461527	781	561.25
FLJ37953	242	1.67957e-09	0.0653821	411	0.08028	202	0.0649165	387	0.05236	274	0.0470751	811	333.135
HDCMA18P	243	1.67988e-09	0.0304163	39	0.12042	512	0.0781336	550	0.08048	795	0.0364722	517	600.038
RNF12	244	1.68898e-09	0.065001	403	0.10858	420	0.101396	820	0.0525	278	0.0224798	197	401.096
PYM	245	1.73183e-09	0.199173	2261	0.11034	434	0.104189	844	0.0435	168	0.00869454	19	352.673
DUSP11	246	1.73822e-09	0.0753239	564	0.11938	503	0.188105	1700	0.03262	65	0.0157533	82	729.654
CSNK2B	247	1.77885e-09	0.156218	1769	0.07174	163	0.0421222	174	0.05234	273	0.0360014	506	2904.25
HUMAGCGB	248	1.78955e-09	0.0947274	872	0.083	222	0.055476	289	0.05042	251	0.0406909	615	1028.02
NIP30	249	1.81094e-09	0.264403	2769	0.08458	230	0.055789	294	0.0377	120	0.0192528	143	333.904
TRIM41	250	1.81722e-09	0.033601	53	0.12444	550	0.120847	1051	0.04926	242	0.0365074	518	834.577
LOC84661	251	1.84196e-09	0.0375836	75	0.1207	513	0.0676733	427	0.08164	823	0.036751	523	1589.9
DC8	252	1.85e-09	0.0549499	265	0.11132	440	0.0769871	534	0.072	612	0.0272833	296	679.942
UBTF	253	1.86247e-09	0.0910944	819	0.08166	210	0.0392294	145	0.07202	614	0.0443138	725	420.962
FBXL3A	254	1.86974e-09	0.132566	1462	0.08494	233	0.0437631	195	0.06226	435	0.0304743	373	772.481
DKFZP434J154	255	1.88071e-09	0.0793444	627	0.10762	407	0.0959739	763	0.05232	272	0.0219335	182	2337.88
FAM20B	256	1.88272e-09	0.10587	1050	0.10878	423	0.0410804	165	0.07782	726	0.0255712	263	386.077
MAP3K11	257	1.88351e-09	0.107716	1085	0.06404	124	0.0414512	169	0.05738	342	0.0574056	1095	1154.88
FLJ90119	258	1.90821e-09	0.0716874	511	0.06204	113	0.0569917	307	0.06392	464	0.0588951	1135	739.846
ZNF337	259	1.91696e-09	0.10148	987	0.10188	360	0.138164	1226	0.03838	127	0.0174848	110	846.75
HOXB9	260	1.92506e-09	0.208237	2342	0.0854	239	0.0773346	538	0.03788	122	0.0184781	130	156.635
SPN	261	1.93401e-09	0.169468	1922	0.07132	162	0.0358294	124	0.06312	446	0.035381	490	658.385
NOLA2	262	1.94612e-09	0.0915059	824	0.07402	173	0.0524398	263	0.06994	577	0.0391742	585	2500.02
ELKS	263	1.95066e-09	0.119491	1285	0.08244	218	0.0421536	175	0.06484	485	0.0362283	511	905.308
ACTR1B	264	1.95828e-09	0.0874038	763	0.09368	293	0.0447635	202	0.05876	379	0.0454683	763	1770.81
MGC14141	265	1.97616e-09	0.161772	1833	0.09926	336	0.0377638	130	0.0547	306	0.0297919	359	1891.35
BRE	266	2.01956e-09	0.128628	1426	0.10942	428	0.059966	334	0.0464	201	0.0257879	270	1054.21
EP300	267	2.02267e-09	0.0641341	390	0.13272	634	0.0403897	160	0.10214	1218	0.0288037	331	296.75
ZNF42	268	2.03812e-09	0.0528118	245	0.09834	330	0.0988673	788	0.05852	374	0.0339177	455	686.846
FLJ12671	269	2.07507e-09	0.0495339	192	0.08482	231	0.0543721	276	0.0915	1014	0.0496422	897	766.788
RNUT1	270	2.08216e-09	0.0910879	818	0.11366	456	0.107728	889	0.04508	189	0.0207086	165	845.327
FLJ22056	271	2.09245e-09	0.0865714	746	0.07918	199	0.042266	177	0.0789	756	0.0457733	770	1192.21
ZNF151	272	2.09335e-09	0.0418912	104	0.13076	607	0.112978	966	0.05264	281	0.0321329	421	553.942
UBA52	273	2.09854e-09	0.280793	2857	0.10906	425	0.064208	375	0.03026	49	0.017637	113	6165.5
FLJ14871	274	2.10924e-09	0.150953	1698	0.05922	98	0.0496336	236	0.05446	302	0.0436492	703	928.846
ZNF9	275	2.11996e-09	0.0468602	155	0.09086	273	0.0623399	359	0.07212	617	0.055379	1053	1562.77
FLJ12994	276	2.12082e-09	0.0948924	877	0.10646	400	0.0296535	83	0.08636	919	0.0409931	628	317.481
MGC48972	277	2.14398e-09	0.109187	1114	0.08208	214	0.0610638	341	0.05512	314	0.0355415	494	280.192
FLJ20772	278	2.15867e-09	0.0321278	48	0.12996	602	0.0824457	596	0.07592	681	0.0413034	638	537.519
RPL24	279	2.16422e-09	0.0955659	886	0.12746	575	0.0835301	609	0.0335	71	0.0317506	408	6545.9
NUDT3	280	2.17334e-09	0.0473037	163	0.12364	538	0.0435151	190	0.08852	953	0.0482399	845	1110.65
RIT1	281	2.17552e-09	0.0469799	159	0.11772	487	0.073715	493	0.0648	484	0.0411798	632	324.288
GOLGA2	282	2.20882e-09	0.111302	1144	0.07276	166	0.0555952	291	0.04762	219	0.0515172	936	341.538
KCNC4	283	2.23134e-09	0.1608	1823	0.09222	285	0.0564398	301	0.04844	232	0.027522	302	247.827
MGC2474	284	2.24058e-09	0.11622	1219	0.1062	397	0.0266662	63	0.0836	854	0.0407197	617	1833.29
RFT1	285	2.24754e-09	0.0695879	483	0.10144	354	0.0951351	753	0.06146	422	0.02723	294	501.212
KIAA1002	286	2.25239e-09	0.148041	1662	0.07698	189	0.038009	133	0.06744	529	0.0385562	568	1394.65
UBE2Q	287	2.26606e-09	0.0696697	486	0.11402	459	0.0738231	495	0.06382	460	0.0302769	368	1432.73
FLJ21439	288	2.26967e-09	0.109868	1124	0.10484	378	0.0936765	732	0.05102	257	0.0206162	163	734.788
KIAA0643	289	2.28007e-09	0.0493162	188	0.22532	1433	0.183561	1666	0.07274	624	0.00768459	12	776.577
DDX20	290	2.29603e-09	0.510587	3404	0.07914	198	0.0164403	19	0.0618	427	0.027966	312	550.423
TMEM1	291	2.30254e-09	0.0609942	361	0.12492	551	0.13195	1167	0.04718	213	0.0242736	233	415.481
NFATC4	292	2.30976e-09	0.120856	1295	0.06472	126	0.0450626	204	0.0697	572	0.0470138	810	543.731
HINT1	293	2.33925e-09	0.113466	1179	0.08206	213	0.0474211	224	0.05348	294	0.0495372	892	5183.5
CDK4	294	2.345e-09	0.174461	1987	0.07492	180	0.0345165	117	0.06652	517	0.0390737	582	1066.81
FLJ31121	295	2.36703e-09	0.0552128	269	0.09456	301	0.0663449	408	0.06366	455	0.0536783	998	1756.54
NEO1	296	2.38127e-09	0.0521676	237	0.16494	910	0.125018	1091	0.0601	403	0.0184183	129	605.75
HFE	297	2.39859e-09	0.0282476	22	0.08708	245	0.076439	529	0.08022	788	0.0795195	1595	790.865
FBXL12	298	2.40499e-09	0.0511546	222	0.1269	571	0.136755	1208	0.04812	230	0.0281523	315	1329.81
TUBGCP2	299	2.41804e-09	0.0644409	396	0.11084	436	0.0684243	433	0.0717	604	0.0345058	470	676.519
FLJ20514	300	2.45684e-09	0.095769	891	0.14266	716	0.11348	972	0.05004	248	0.0158353	84	343.192
ZDHHC7	301	2.46435e-09	0.0290924	26	0.1212	518	0.105389	862	0.06146	423	0.0539569	1008	1477.25
RAP140	302	2.49804e-09	0.146333	1644	0.09148	281	0.0654526	393	0.0641	469	0.0222414	190	613.462
STX5A	303	2.49973e-09	0.102555	999	0.07498	181	0.0848172	630	0.05256	280	0.0364641	516	344.231
COPS7A	304	2.50934e-09	0.10862	1098	0.11322	452	0.0859874	652	0.05772	349	0.020558	162	1296.52
VTI1A	305	2.51183e-09	0.41388	3270	0.1161	473	0.0546	279	0.04112	145	0.0116427	43	46.5769
KCNMB3	306	2.51446e-09	0.234737	2566	0.07842	196	0.0269234	65	0.06378	457	0.0397775	595	150.192
ZNF432	307	2.52451e-09	0.185387	2114	0.11958	506	0.0484478	229	0.06832	543	0.0172041	103	250.308
MGC3329	308	2.55148e-09	0.238746	2604	0.08316	223	0.061709	348	0.04172	151	0.0249611	252	134.058
MGC33867	309	2.58019e-09	0.167117	1899	0.09718	324	0.100244	808	0.04436	179	0.0178657	120	1248.27
HEAB	310	2.59896e-09	0.0272441	20	0.10778	409	0.0778202	544	0.086	912	0.0661322	1289	819.212
CHD4	311	2.61607e-09	0.0420198	107	0.10944	429	0.0616585	347	0.09156	1015	0.050389	909	1937.63
PRPSAP2	312	2.62916e-09	0.0845764	710	0.10046	346	0.107485	886	0.04394	173	0.032763	434	544.288
ZNF236	313	2.63788e-09	0.0778646	601	0.08322	224	0.085817	647	0.05626	329	0.0421628	666	932.519
FLJ31295	314	2.64271e-09	0.0889676	785	0.12324	535	0.0574577	311	0.05596	323	0.0374848	542	899.077
GTF3C4	315	2.64509e-09	0.0578952	317	0.12918	594	0.0895953	693	0.0764	690	0.0258369	272	762.365
MGC14151	316	2.65068e-09	0.145893	1638	0.10212	362	0.0390093	143	0.06604	510	0.0345344	472	1249.83
TRAPPC3	317	2.65701e-09	0.0660465	422	0.10062	348	0.080441	576	0.06432	476	0.0386412	572	826.981
HSPC132	318	2.65712e-09	0.0560445	288	0.09676	321	0.0936037	728	0.05718	340	0.0457783	771	962.942
MNAB	319	2.66394e-09	0.0739325	545	0.1242	544	0.0582812	318	0.07816	737	0.0318471	410	417.577
ATP5I	320	2.67145e-09	0.237458	2590	0.1296	599	0.0698426	450	0.06558	498	0.00947718	24	2517.79
NCOA1	321	2.69944e-09	0.0614895	368	0.11234	447	0.055754	293	0.07648	693	0.0458279	772	2158.4
BECN1	322	2.70859e-09	0.0364804	66	0.13108	611	0.0365065	127	0.10458	1273	0.0741897	1481	844.385
FLJ10996	323	2.71393e-09	0.0418652	102	0.11906	498	0.095062	752	0.06588	507	0.0434745	700	573.019
PELP1	324	2.71512e-09	0.131773	1455	0.06502	129	0.0402509	158	0.06746	531	0.0583593	1123	267.442
ELAC1	325	2.73356e-09	0.143809	1615	0.10446	376	0.0768253	531	0.04764	220	0.0248618	249	182.288
RPL27A	326	2.7385e-09	0.225547	2491	0.09636	317	0.0537414	273	0.05182	265	0.0226249	204	13126.5
PSMD7	327	2.75234e-09	0.103616	1015	0.12234	527	0.0780418	548	0.06576	503	0.0211559	172	901.096
NSPC1	328	2.75775e-09	0.155081	1758	0.06908	152	0.0496553	238	0.05772	348	0.0449124	746	308.019
USP7	329	2.77398e-09	0.0995628	952	0.10608	394	0.0801601	570	0.06284	442	0.0260731	275	1293.08
PSCD2	330	2.78348e-09	0.137	1524	0.08586	241	0.10213	823	0.04488	184	0.0258158	271	655.692
FBXO18	331	2.78901e-09	0.0815727	678	0.1422	714	0.143099	1273	0.05242	276	0.0160283	86	605.712
ZNF213	332	2.79214e-09	0.147469	1658	0.13688	666	0.196961	1768	0.04334	167	0.00810296	15	214.596
DKFZP547E1010	333	2.79759e-09	0.0995172	951	0.10012	345	0.0819162	589	0.05048	253	0.033954	458	1062.5
NRF1	334	2.81933e-09	0.0428171	116	0.10874	422	0.0644972	381	0.08172	826	0.0574493	1097	546.538
SEMA6A	335	2.86976e-09	0.0395675	92	0.14052	704	0.105978	869	0.0847	879	0.0287531	330	724.327
BRUNOL6	336	2.87975e-09	0.0324889	51	0.1408	708	0.103932	840	0.07838	743	0.0386436	573	574.442
SEMA4C	337	2.88035e-09	0.292675	2915	0.0804	203	0.0440011	198	0.0506	254	0.0274919	301	685.827
PINK1	338	2.88914e-09	0.0872178	760	0.12434	546	0.0434589	189	0.07136	599	0.042957	690	3106.12
HOXB5	339	2.91727e-09	0.0674854	447	0.06768	141	0.0786888	557	0.05698	338	0.0712337	1408	740.308
DNAH7	340	2.97903e-09	0.0271997	19	0.1198	508	0.0937879	735	0.07894	757	0.0617484	1200	499.519
APG4B	341	3.02346e-09	0.183132	2086	0.07034	158	0.0523528	262	0.0495	245	0.0452905	757	519.269
BTF3	342	3.02599e-09	0.0806407	655	0.16832	945	0.105224	861	0.05286	288	0.0200424	153	3472.06
MGC29729	343	3.03644e-09	0.0953453	882	0.0854	238	0.0399296	155	0.07456	655	0.0626356	1218	749.923
CSNK1E	344	3.06586e-09	0.196775	2241	0.09482	304	0.0435739	191	0.05254	279	0.0358906	503	430.885
SUPT4H1	345	3.1011e-09	0.0703956	493	0.10614	396	0.055814	295	0.07288	628	0.0510217	929	1081.37
FLJ10842	346	3.10547e-09	0.0552108	268	0.17548	1011	0.104846	855	0.06492	486	0.0235484	216	630.077
MGC14327	347	3.12205e-09	0.121557	1310	0.12614	563	0.127487	1119	0.0354	93	0.0225608	202	951.731
FLJ14681	348	3.14774e-09	0.0523354	239	0.1275	576	0.0672792	424	0.074	644	0.0473801	822	79.7692
PSMA6	349	3.15191e-09	0.248	2671	0.07464	178	0.0407255	163	0.06378	458	0.0327804	435	2009.54
RFP	350	3.18384e-09	0.0790398	622	0.1277	578	0.0735216	487	0.08714	928	0.0246206	242	872.308
GGPS1	351	3.20167e-09	0.136011	1508	0.14384	727	0.0706884	454	0.08116	812	0.0142642	67	655.596
PARK7	352	3.23254e-09	0.098584	940	0.12886	591	0.0974641	774	0.0448	183	0.0291416	342	5002.27
M96	353	3.24694e-09	0.0752705	563	0.10858	421	0.0535426	271	0.08672	925	0.0427855	682	808.635
PRSS22	354	3.26581e-09	0.055831	282	0.08974	264	0.0559922	296	0.09222	1029	0.0631237	1227	521.115
RNF7	355	3.28236e-09	0.0824768	690	0.11952	505	0.0732697	479	0.06868	552	0.0330883	442	458.865
DDB1	356	3.28508e-09	0.0283152	23	0.21136	1332	0.207825	1852	0.06608	515	0.0199872	151	2316.56
PPP1R15B	357	3.30041e-09	0.108049	1091	0.09488	306	0.0394562	148	0.09726	1133	0.0419508	658	591.135
KIAA0649	358	3.32421e-09	0.266042	2780	0.08494	234	0.05107	247	0.0479	225	0.0300705	363	466.788
KIF2C	359	3.34376e-09	0.376422	3187	0.06896	150	0.0413257	168	0.05214	271	0.0298942	360	840.135
RPS15	360	3.38176e-09	0.203849	2298	0.10172	359	0.0726006	471	0.03412	78	0.0329225	437	15293.1
AP4B1	361	3.42814e-09	0.0781587	609	0.11934	502	0.0791643	562	0.08124	813	0.0285766	325	582.135
MX2	362	3.43576e-09	0.0569047	296	0.09768	325	0.0899208	695	0.06688	522	0.0513958	934	627.173
CASP9	363	3.45664e-09	0.0556476	277	0.1395	696	0.205161	1827	0.03548	95	0.0305893	379	1057.29
NDUFS2	364	3.47032e-09	0.124978	1363	0.10068	350	0.0868327	659	0.05806	361	0.0273557	298	2575.94
SEMA3F	365	3.51176e-09	0.153787	1740	0.09048	269	0.038309	135	0.06714	525	0.0490664	872	1231.71
GALNACT-2	366	3.56193e-09	0.0294965	32	0.1537	800	0.0723559	468	0.09104	998	0.0596418	1147	1437.35
ZNF286	367	3.56212e-09	0.0806932	656	0.10262	367	0.0820003	590	0.06388	463	0.0410653	629	385.231
RPS7	368	3.59075e-09	0.124401	1351	0.07272	165	0.0672202	423	0.0602	406	0.0490485	870	3654
POLR2H	369	3.63191e-09	0.085134	721	0.08992	265	0.0786491	556	0.0689	557	0.0437802	707	1166.46
RNF40	370	3.65387e-09	0.132537	1461	0.12962	600	0.112239	959	0.037	115	0.0256103	265	875.808
PIP3AP	371	3.68819e-09	0.0480836	172	0.23672	1544	0.0649703	388	0.10346	1250	0.0241051	228	618.154
TBCE	372	3.69825e-09	0.0726059	526	0.1476	740	0.0511888	249	0.11134	1396	0.030278	369	492.885
MGC19604	373	3.72992e-09	0.0660383	421	0.1467	734	0.159161	1426	0.04608	199	0.0262506	279	615.154
RING1	374	3.73366e-09	0.073605	540	0.11196	446	0.168697	1529	0.03992	138	0.033642	448	2008.4
CGI-143	375	3.76551e-09	0.0783671	612	0.10064	349	0.0630541	367	0.0828	840	0.0457289	768	350.904
THY28	376	3.77221e-09	0.0776838	598	0.11296	451	0.0730885	476	0.07078	595	0.0415525	646	663.154
MRPL40	377	3.79251e-09	0.15023	1686	0.09952	340	0.0834706	607	0.04128	149	0.0368132	524	524.019
MYST3	378	3.80012e-09	0.081103	667	0.11288	450	0.0490803	233	0.08942	972	0.0472952	820	1207.35
UBE3B	379	3.83071e-09	0.0620548	374	0.19202	1161	0.147886	1317	0.08248	837	0.0131794	53	644.885
ERH	380	3.89332e-09	0.108794	1105	0.09484	305	0.0665677	413	0.05528	315	0.0512754	932	2198.37
RRAGA	381	3.9062e-09	0.193015	2200	0.07044	159	0.0592424	323	0.0648	483	0.0374243	540	2133.85
DRAP1	382	3.9431e-09	0.111138	1143	0.10248	364	0.0546329	281	0.0678	536	0.0467378	797	583.904
PTPN2	383	4.04932e-09	0.229121	2527	0.092	284	0.0529636	265	0.05354	297	0.0338758	454	442.115
RPS14	384	4.06602e-09	0.309383	2978	0.0913	277	0.0736065	488	0.03934	133	0.0248581	248	11785.9
MGC4825	385	4.07406e-09	0.079515	631	0.12702	572	0.0436722	194	0.10394	1263	0.0444359	732	981.25
ZNF7	386	4.09691e-09	0.159864	1815	0.08148	209	0.0756086	515	0.0589	384	0.0353171	487	522.019
RPS15A	387	4.11672e-09	0.171419	1949	0.09328	291	0.0739887	496	0.06176	426	0.0281738	316	5206.13
EWSR1	388	4.11886e-09	0.145687	1635	0.0938	295	0.0496166	235	0.07776	722	0.0390649	581	1167.42
SCAMP2	389	4.24525e-09	0.0588551	332	0.15906	859	0.126295	1105	0.07438	652	0.0241396	230	1431.65
BTBD6	390	4.27308e-09	0.02939	31	0.16404	904	0.119367	1039	0.07484	660	0.0496122	895	2712.5
RPL13A	391	4.276e-09	0.204254	2305	0.18968	1146	0.221634	1940	0.03494	87	0.00712692	8	19763.6
AP4S1	392	4.27927e-09	0.131413	1449	0.10532	385	0.164375	1477	0.03694	114	0.0254626	260	193.135
NDUFB6	393	4.30439e-09	0.18877	2151	0.07812	195	0.041146	166	0.07226	619	0.0490914	874	1291.54
SEC22L2	394	4.34155e-09	0.134174	1479	0.11824	491	0.0684981	436	0.06642	516	0.030078	364	240.269
NTE	395	4.34645e-09	0.0794145	629	0.15126	775	0.0941451	738	0.07712	708	0.0249208	251	1030.17
PIK3CD	396	4.37153e-09	0.0638983	388	0.10998	432	0.0497935	240	0.08536	900	0.0731844	1455	614.423
SSNA1	397	4.39442e-09	0.243166	2640	0.06698	138	0.0500512	242	0.06006	402	0.0448817	745	803.096
HECA	398	4.41639e-09	0.0859978	738	0.09604	315	0.0611955	343	0.06834	545	0.0639364	1245	697.615
ZNF41	399	4.41818e-09	0.402085	3243	0.04502	40	0.0525553	264	0.04478	182	0.0518603	945	77.8654
PUM1	400	4.43294e-09	0.121725	1313	0.09322	290	0.0556675	292	0.077	705	0.0455751	766	1612.29
NUDC	401	4.43672e-09	0.0305506	40	0.11764	486	0.0986193	787	0.0888	960	0.0704901	1389	2129.65
CML66	402	4.47585e-09	0.199802	2263	0.0699	156	0.0548844	285	0.05532	316	0.0527817	976	125.423
CDC16	403	4.50054e-09	0.0978204	926	0.13844	679	0.0337715	109	0.09282	1044	0.0530148	981	1106.15
BLVRA	404	4.54511e-09	0.032695	52	0.12798	582	0.0871297	667	0.08886	961	0.0701558	1381	1030.04
PRCC	405	4.54934e-09	0.1235	1340	0.1113	439	0.0881925	677	0.05694	337	0.0329572	439	232.692
GOLGA5	406	4.57789e-09	0.0777448	600	0.12132	519	0.0837437	611	0.08758	941	0.0330917	443	507.173
RBM5	407	4.59239e-09	0.0999642	955	0.1039	375	0.0488133	232	0.08406	865	0.0538848	1004	1251.98
FLJ10201	408	4.60194e-09	0.24364	2642	0.10352	373	0.0427065	180	0.06034	408	0.0354066	492	332.942
ZNF278	409	4.61412e-09	0.0879162	772	0.13198	626	0.0849088	634	0.06608	514	0.0354409	493	798.327
SSR2	410	4.62264e-09	0.102943	1004	0.08788	251	0.0583152	319	0.0815	816	0.0537623	1001	1694.58
YY1	411	4.66737e-09	0.0850601	719	0.1255	558	0.0733801	482	0.0836	855	0.0356397	496	1217.79
RPL38	412	4.70294e-09	0.12857	1422	0.09134	280	0.0755172	513	0.0598	398	0.0443442	728	16009.9
SCMH1	413	4.71669e-09	0.0899704	798	0.108	414	0.087073	664	0.07176	605	0.0388475	578	803.692
IMAGE3451454	414	4.73507e-09	0.130096	1434	0.12424	545	0.0718577	463	0.07402	645	0.0275419	304	784.077
ZNF32	415	4.77476e-09	0.073626	541	0.1761	1019	0.149092	1325	0.05648	335	0.0218689	180	526.481
CLOCK	416	4.78719e-09	0.0672838	444	0.09132	278	0.0800965	569	0.07678	700	0.0633517	1230	943.942
RGS19IP1	417	4.8229e-09	0.182754	2082	0.078	193	0.0510069	246	0.07066	592	0.0469417	807	686.192
TCFL1	418	4.85312e-09	0.119355	1282	0.1237	539	0.0844776	623	0.06382	461	0.0304878	375	1572.15
AIP	419	4.86116e-09	0.114269	1187	0.13162	618	0.0968986	770	0.06518	491	0.0255902	264	1628.27
VAT1	420	4.86132e-09	0.136805	1520	0.20962	1315	0.24481	2088	0.03184	55	0.0108751	36	1653.17
ODAG	421	4.87722e-09	0.0967864	908	0.10842	419	0.0761826	527	0.0709	596	0.0430291	691	540.269
PWP1	422	4.88237e-09	0.0650411	405	0.13066	606	0.0453675	206	0.11564	1474	0.0547599	1033	734.538
NMNAT1	423	4.90287e-09	0.0466054	152	0.13232	630	0.0941818	739	0.08548	903	0.0493825	889	393.962
PIP5K2B	424	4.93677e-09	0.158991	1807	0.08508	237	0.0445763	201	0.07658	694	0.0534614	986	1482
ABCF3	425	4.94435e-09	0.0770412	583	0.1174	485	0.0905563	700	0.0611	417	0.0494053	891	998.231
FLJ33915	426	4.94562e-09	0.0869755	752	0.07856	197	0.0768408	532	0.06278	441	0.0750283	1501	353.577
PRPF31	427	4.95011e-09	0.0293779	30	0.16064	877	0.224891	1967	0.06556	497	0.035575	495	632.942
SIRT7	428	4.95409e-09	0.0937426	856	0.08584	240	0.129112	1136	0.0504	250	0.0473103	821	477.231
ZFYVE26	429	5.013e-09	0.114896	1196	0.14876	756	0.0363831	125	0.09784	1144	0.0412006	634	274.288
NFX1	430	5.03294e-09	0.0400748	95	0.11984	509	0.128887	1132	0.07206	616	0.0564235	1075	634.058
GNAI2	431	5.10082e-09	0.0893291	789	0.16926	954	0.107348	883	0.06352	453	0.0247403	245	770.423
RPL30	432	5.10324e-09	0.112396	1159	0.15824	855	0.130116	1150	0.04934	243	0.0223495	192	10264.9
FLJ36812	433	5.12526e-09	0.0389711	84	0.10574	392	0.0904292	698	0.08898	962	0.0772944	1543	506.288
MGC15677	434	5.12694e-09	0.111618	1149	0.14058	706	0.0732921	480	0.07554	673	0.0295108	353	564.846
FLJ21820	435	5.20375e-09	0.0572658	304	0.21404	1348	0.0687842	439	0.08996	981	0.0343086	466	643.942
PISD	436	5.20679e-09	0.377578	3191	0.06534	133	0.0390081	142	0.05788	353	0.046743	798	373.231
RFC3	437	5.21834e-09	0.100922	975	0.13862	684	0.0740999	497	0.09144	1013	0.0275286	303	308.115
KLF7	438	5.29421e-09	0.0733234	536	0.10546	386	0.11216	956	0.0716	601	0.0426321	676	1189.06
FLJ10569	439	5.50544e-09	0.0457769	142	0.13478	648	0.0850016	636	0.07924	768	0.0662467	1294	880.923
SPG4	440	5.5121e-09	0.277092	2835	0.10344	372	0.03519	121	0.07828	739	0.03491	478	216.288
MTMR3	441	5.5373e-09	0.0995655	953	0.11092	437	0.075183	510	0.08444	871	0.0394936	591	888.038
MGC14595	442	5.58111e-09	0.170223	1930	0.08888	259	0.06592	402	0.05894	385	0.0474772	826	399.654
PLAG1	443	5.59374e-09	0.36648	3157	0.0981	328	0.0802393	572	0.03518	92	0.0275623	305	49.5
KIAA1468	444	5.61059e-09	0.0507834	214	0.15918	861	0.0547713	283	0.09572	1097	0.0662001	1291	749.077
SCAP	445	5.61636e-09	0.144971	1623	0.09338	292	0.0759575	522	0.06406	468	0.0426362	678	1264.83
KIAA1627	446	5.62441e-09	0.0395415	91	0.13884	688	0.104526	850	0.09888	1165	0.0495668	894	879.308
MRPL9	447	5.62571e-09	0.107301	1076	0.12176	522	0.051243	250	0.0832	846	0.0505042	917	526.308
RPL37A	448	5.64274e-09	0.0883732	776	0.14754	739	0.0582308	317	0.0849	882	0.0437739	706	33224.9
NME6	449	5.65029e-09	0.0547921	261	0.13928	695	0.0965909	764	0.09112	1001	0.0420659	660	535.885
ACTB	450	5.67888e-09	0.0871544	757	0.11658	475	0.125459	1096	0.04122	147	0.0540449	1011	29362.7
CDK2AP1	451	5.69664e-09	0.166889	1895	0.10608	395	0.0586789	322	0.06802	538	0.0403139	603	2347.92
DOCK1	452	5.70172e-09	0.0701357	489	0.10256	366	0.0949188	751	0.058	359	0.0719985	1430	1069.77
FLJ20625	453	5.71477e-09	0.145824	1637	0.14882	758	0.182352	1656	0.0449	185	0.0160831	87	1731.4
WDR26	454	5.75747e-09	0.192531	2186	0.09626	316	0.0672055	422	0.06986	573	0.0330878	441	748.327
MGC23918	455	5.88928e-09	0.146449	1646	0.10252	365	0.101108	818	0.04534	192	0.0427872	683	634.462
SLC4A1AP	456	5.94176e-09	0.0850961	720	0.12922	595	0.135692	1199	0.0651	490	0.0305883	378	989.865
RPS12	457	5.94627e-09	0.122368	1319	0.12996	603	0.0655669	397	0.09026	986	0.0315939	404	7544.71
FLJ20211	458	5.95479e-09	0.228247	2517	0.11476	469	0.0460175	216	0.05274	282	0.0468408	803	296.904
SIAH1	459	5.97436e-09	0.161369	1828	0.10572	391	0.038732	140	0.0975	1139	0.0463719	788	901.077
SPUF	460	5.98342e-09	0.171889	1952	0.10658	401	0.0683695	432	0.06412	470	0.037255	533	2033.77
TUBD1	461	5.98776e-09	0.0773204	590	0.10052	347	0.0594967	326	0.1011	1200	0.0640456	1249	323.269
ERAL1	462	6.09704e-09	0.0583161	322	0.12282	531	0.176161	1599	0.05164	264	0.0467931	802	949.923
PIK3CB	463	6.11086e-09	0.129662	1429	0.098	327	0.0638431	371	0.06832	544	0.0551337	1042	589.058
UBAP1	464	6.12247e-09	0.110984	1141	0.11136	441	0.0656606	398	0.06726	526	0.0560905	1067	1077.96
EVER1	465	6.17602e-09	0.244899	2649	0.15716	845	0.143208	1274	0.03922	132	0.0142863	69	713.019
TFIP11	466	6.20738e-09	0.134618	1487	0.15438	807	0.0643826	377	0.0658	504	0.0352561	486	479.442
CPSF3	467	6.22292e-09	0.481542	3380	0.07946	200	0.0444245	200	0.06564	500	0.0278892	310	338.692
FLJ10587	468	6.37802e-09	0.0291613	28	0.12944	596	0.0915073	707	0.10824	1334	0.0853063	1723	703.115
EIF3S3	469	6.39384e-09	0.103586	1014	0.09822	329	0.0992282	792	0.06072	413	0.0521568	958	2358.25
ZNF358	470	6.42735e-09	0.260124	2742	0.07584	185	0.0411657	167	0.07548	672	0.0524326	963	387.115
PSARL	471	6.43857e-09	0.052986	246	0.1602	873	0.089834	694	0.10308	1243	0.0409606	624	821.423
CCND3	472	6.59428e-09	0.179769	2052	0.10272	368	0.0654972	395	0.0589	383	0.0462887	786	910.558
SEC15L1	473	6.60846e-09	0.117948	1264	0.15426	806	0.031187	95	0.13242	1740	0.0439791	714	508.038
COG1	474	6.63258e-09	0.0691646	472	0.17456	1005	0.101388	819	0.07238	621	0.0374338	541	1368.46
TSN	475	6.64737e-09	0.0731449	533	0.15446	809	0.0596487	327	0.08946	973	0.055136	1043	961.558
PRDM2	476	6.77767e-09	0.124779	1359	0.1223	526	0.0693921	446	0.08504	887	0.0376351	548	1334.85
NUP54	477	6.78547e-09	0.15261	1724	0.13122	615	0.138284	1227	0.04796	227	0.0255482	261	317.423
PCDHGC3	478	6.79251e-09	0.318703	3025	0.09006	266	0.0618778	350	0.06912	563	0.0276687	307	4134.71
RBMS2	479	6.84532e-09	0.161804	1834	0.13876	685	0.166996	1505	0.05146	262	0.017741	118	144.058
STX18	480	6.86202e-09	0.0917758	829	0.11258	448	0.0858198	648	0.06668	519	0.0580357	1112	1220.15
RPL12	481	6.92746e-09	0.268491	2790	0.09654	320	0.0533741	267	0.06744	530	0.0371282	529	6200.98
DCTN3	482	6.94603e-09	0.162768	1844	0.09964	342	0.050599	244	0.08578	907	0.0493426	887	2135.62
LOC143458	483	6.94828e-09	0.117735	1258	0.10476	377	0.0438013	196	0.09126	1005	0.0704732	1388	300.885
SLC25A17	484	6.95434e-09	0.0910679	817	0.13174	622	0.12414	1081	0.06808	540	0.0342971	464	296.673
FAU	485	7.00426e-09	0.339564	3083	0.084	228	0.0488067	231	0.05836	370	0.0431104	693	8186.65
ADPRT	486	7.04541e-09	0.0449817	138	0.15678	839	0.15013	1332	0.06048	411	0.0550193	1038	1111.1
PEX1	487	7.08079e-09	0.120234	1291	0.19028	1152	0.100296	809	0.0739	642	0.0208807	167	230.808
PEX11B	488	7.08733e-09	0.04523	140	0.16076	882	0.123567	1078	0.07798	732	0.0505834	919	870.25
UQCR	489	7.11264e-09	0.555863	3437	0.10138	353	0.061902	351	0.04406	174	0.0231407	212	4084.62
ZNF407	490	7.14559e-09	0.222683	2476	0.06512	132	0.061267	344	0.06194	429	0.0649312	1266	100.673
LOC51123	491	7.24672e-09	0.0592431	337	0.15718	846	0.0730462	473	0.1102	1379	0.048344	848	1193.29
MRPL16	492	7.25548e-09	0.0540086	253	0.16576	918	0.110679	937	0.07794	731	0.0469799	808	893.481
GNB2	493	7.30598e-09	0.116103	1214	0.14008	699	0.0637364	370	0.07624	688	0.0462281	785	1335.52
PSMC1	494	7.34862e-09	0.0780044	603	0.14866	754	0.138149	1225	0.05182	266	0.0442653	721	2510.71
B4GALT2	495	7.3743e-09	0.108695	1103	0.1318	624	0.08121	582	0.07882	754	0.040213	602	998.962
DCTN6	496	7.41256e-09	0.114391	1189	0.10362	374	0.0668841	420	0.08474	880	0.0551742	1046	1023.17
LOC51619	497	7.4762e-09	0.0564898	293	0.26056	1722	0.185807	1685	0.06542	495	0.0208951	170	3170.12
SERF2	498	7.51501e-09	0.595645	3461	0.12572	559	0.0301874	87	0.0674	528	0.0246642	244	3458.21
SLC12A2	499	7.55326e-09	0.0818374	680	0.1115	443	0.0812974	584	0.09084	992	0.0560492	1065	928
FLJ13479	500	7.59712e-09	0.169434	1920	0.08188	212	0.0829733	604	0.07278	625	0.0453455	760	55.0385
FLJ90652	501	7.61244e-09	0.238013	2597	0.13552	654	0.114226	981	0.05248	277	0.0196868	148	29.6923
MGC50559	502	7.63705e-09	0.124617	1356	0.0883	254	0.102304	825	0.0512	258	0.0662588	1297	313.846
GABPA	503	7.64233e-09	0.206743	2324	0.0939	296	0.0534651	269	0.08214	833	0.0448249	743	52.9423
DIRC2	504	7.66524e-09	0.05448	257	0.09544	308	0.0737594	494	0.10968	1366	0.0911233	1839	561.154
CPEB1	505	7.68374e-09	0.558682	3440	0.0764	187	0.106839	876	0.03234	62	0.0260531	274	355.327
SSRP1	506	7.70489e-09	0.113149	1174	0.09916	335	0.0917084	708	0.0728	626	0.0514344	935	648.519
WDR8	507	7.70494e-09	0.19183	2176	0.16724	935	0.084679	628	0.06604	511	0.0214756	177	100.077
MGC16028	508	7.72132e-09	0.0667013	432	0.12776	580	0.086523	656	0.10686	1309	0.0490039	866	842.942
MAML1	509	7.72389e-09	0.0525344	241	0.20982	1318	0.271435	2238	0.05826	366	0.0221577	187	1089.37
LOC90522	510	7.7546e-09	0.10748	1082	0.1736	997	0.0478695	225	0.08456	873	0.0513421	933	881.038
PDE6D	511	7.76279e-09	0.351531	3113	0.11402	460	0.0854286	645	0.06128	419	0.0184998	132	253.519
HMGB3	512	7.7962e-09	0.126643	1391	0.12814	584	0.0571324	308	0.0936	1059	0.0449237	748	669.404
FLJ34283	513	7.82303e-09	0.417661	3276	0.0751	182	0.0452431	205	0.064	466	0.043072	692	85.6538
PB1	514	7.83187e-09	0.0708109	501	0.13368	643	0.126303	1106	0.07868	748	0.0416329	649	738.25
MRPL18	515	7.84524e-09	0.0498097	200	0.1483	751	0.0880005	675	0.08274	839	0.07294	1447	1284.21
RAB3-GAP150	516	7.85065e-09	0.116741	1228	0.11928	501	0.0775831	541	0.07942	771	0.0457544	769	1060.4
PRO2730	517	7.85839e-09	0.156401	1772	0.13438	647	0.0858998	649	0.05474	307	0.0397629	594	1903.62
BBS4	518	7.88138e-09	0.123414	1339	0.119	497	0.0795374	565	0.07618	686	0.044289	722	325.269
FLJ11712	519	7.90236e-09	0.0679073	448	0.16212	888	0.181648	1650	0.04504	187	0.0438723	711	1114.19
FLJ14154	520	7.99179e-09	0.157106	1785	0.15178	781	0.111493	948	0.05202	268	0.0288959	337	2884.69
FBXO7	521	7.99612e-09	0.173946	1982	0.14292	718	0.0859397	651	0.07664	696	0.0244195	237	2398.85
TMOD3	522	8.04968e-09	0.28582	2884	0.13792	677	0.0318059	97	0.11354	1438	0.0282759	318	59.0385
ZFP95	523	8.06437e-09	0.129954	1433	0.15312	792	0.171163	1559	0.05854	375	0.0202256	156	352.135
TBC1D5	524	8.07726e-09	0.0517612	234	0.24074	1574	0.135333	1194	0.0537	298	0.0446013	736	1007.85
KIAA1804	525	8.16524e-09	0.0970089	911	0.139	689	0.104961	857	0.07188	608	0.0401349	599	407.154
SOS1	526	8.23998e-09	0.0437723	126	0.13304	639	0.0732238	477	0.12172	1559	0.0793863	1588	491.365
MR1	527	8.33761e-09	0.139888	1569	0.2102	1323	0.169314	1538	0.07772	717	0.0107751	35	635.038
SYNGR1	528	8.35179e-09	0.299659	2941	0.11498	470	0.0613939	346	0.0584	372	0.033807	452	2026.65
NICE-4	529	8.37144e-09	0.0486089	177	0.13728	671	0.137315	1218	0.08796	945	0.0519386	949	967.25
RPS10	530	8.38298e-09	0.303861	2951	0.07326	169	0.0550472	288	0.0619	428	0.0552644	1049	20707.8
PSMB4	531	8.43121e-09	0.12591	1383	0.14586	733	0.105441	864	0.06828	542	0.0318865	412	2335.27
CYB561	532	8.46606e-09	0.0683214	459	0.12828	586	0.0561427	298	0.1253	1622	0.0686652	1351	758.788
FLJ23451	533	8.50129e-09	0.173272	1974	0.08016	201	0.0948166	750	0.0562	328	0.0574372	1096	186.904
FLJ21919	534	8.50176e-09	0.0591015	336	0.13646	660	0.133291	1176	0.07064	590	0.0559847	1062	764.596
STK4	535	8.60911e-09	0.0863086	742	0.17452	1004	0.1232	1071	0.05626	330	0.0412347	635	338.096
CHST8	536	8.63e-09	0.248396	2675	0.06342	122	0.0621862	354	0.06506	489	0.0677091	1331	345.423
RLF	537	8.75097e-09	0.110847	1138	0.12998	604	0.039553	149	0.10302	1240	0.0745365	1491	423.365
ZFYVE1	538	8.77369e-09	0.0426018	111	0.17248	988	0.16825	1525	0.08486	881	0.0418188	654	907.038
HGS	539	8.77515e-09	0.0681953	454	0.16014	870	0.12327	1073	0.05642	333	0.0577728	1106	1319.38
ADPRHL2	540	8.78196e-09	0.0931999	844	0.17012	967	0.0883063	679	0.0781	736	0.04016	601	735.019
DDX5	541	8.78727e-09	0.157346	1790	0.09094	275	0.05926	324	0.08918	969	0.0581072	1115	2521.02
PTDSS1	542	8.80567e-09	0.198762	2258	0.12386	541	0.0300096	84	0.0987	1162	0.060386	1167	1909.62
CUGBP1	543	8.82665e-09	0.0787416	617	0.17366	998	0.107327	882	0.09824	1153	0.0306132	380	1578.62
CNR1	544	8.86415e-09	0.435287	3309	0.04668	52	0.0694304	447	0.04308	163	0.0729324	1446	604.577
KIAA1582	545	8.8768e-09	0.275613	2830	0.20134	1236	0.216594	1909	0.05336	293	0.0069212	6	154.346
RPL5	546	8.89308e-09	0.143506	1609	0.20372	1260	0.213033	1884	0.03828	125	0.0186528	137	5644.94
OIP106	547	8.9195e-09	0.101537	988	0.20176	1241	0.0820899	593	0.10754	1324	0.0246626	243	925.827
SNX25	548	8.9619e-09	0.145133	1626	0.18196	1067	0.0843963	621	0.05788	354	0.0347393	476	310.5
ANC_2H01	549	9.04368e-09	0.304714	2955	0.12198	524	0.0308918	92	0.0974	1137	0.0404368	606	116.885
ATP5O	550	9.09431e-09	0.0652551	409	0.15862	857	0.131506	1162	0.08046	794	0.0415227	645	3237.75
EPN2	551	9.10505e-09	0.192932	2198	0.08272	219	0.0745734	501	0.06752	532	0.0566586	1079	499.096
DNAJC9	552	9.1271e-09	0.136042	1510	0.13338	641	0.0801759	571	0.0732	633	0.0428576	687	219.788
BFAR	553	9.27372e-09	0.111967	1154	0.12022	510	0.068431	434	0.10524	1280	0.0478375	836	399.731
OSR1	554	9.33284e-09	0.0680815	451	0.19652	1198	0.121551	1058	0.0854	901	0.0336029	447	509.538
FLJ10276	555	9.33749e-09	0.0960733	897	0.15686	841	0.177432	1614	0.05162	263	0.0338283	453	975.135
WRNIP1	556	9.36181e-09	0.340014	3084	0.12188	523	0.0429633	182	0.06968	571	0.0377347	550	114.519
SMARCA4	557	9.38191e-09	0.144725	1622	0.14332	725	0.0694727	448	0.09644	1108	0.0337586	451	1164.04
FLJ38426	558	9.45486e-09	0.256649	2715	0.17168	981	0.0935067	726	0.07704	707	0.0148954	74	114.462
RAD23A	559	9.45526e-09	0.202469	2287	0.15564	825	0.0943991	742	0.07036	587	0.02259	203	1665.02
ORC5L	560	9.48824e-09	0.0936486	855	0.16652	924	0.0831337	606	0.08324	847	0.0439667	713	487.923
MGC2747	561	9.52783e-09	0.0670979	438	0.18934	1143	0.10363	835	0.11592	1481	0.0312187	391	746.615
PRPS1	562	9.54786e-09	0.0661358	424	0.18124	1061	0.089551	690	0.13706	1812	0.0324526	428	1259.31
BOMB	563	9.56281e-09	0.232704	2550	0.09426	299	0.0600785	336	0.07676	699	0.0472734	819	98.3654
ZNF136	564	9.59558e-09	0.057644	314	0.12442	549	0.0566638	302	0.13398	1770	0.0881245	1783	415.788
TNFRSF11A	565	9.59766e-09	0.392736	3222	0.08828	253	0.0814546	585	0.05352	296	0.0317531	409	82.5577
TENC1	566	9.59855e-09	0.0625891	376	0.16568	915	0.0786117	555	0.1013	1204	0.058124	1116	1438.42
PSMD2	567	9.72406e-09	0.080207	646	0.12622	564	0.0967032	766	0.08614	916	0.0576603	1103	1832.25
GCN5L2	568	9.72595e-09	0.0733983	538	0.17952	1044	0.221571	1938	0.07054	588	0.0236156	218	1274
SLC11A2	569	9.73527e-09	0.113385	1178	0.15274	790	0.0351615	120	0.13804	1832	0.0579138	1109	738.654
MLLT4	570	9.78548e-09	0.219469	2447	0.10126	352	0.0429893	184	0.0944	1074	0.0542567	1020	289.788
ING3	571	9.87018e-09	0.047572	167	0.22206	1412	0.115046	991	0.09982	1180	0.0406845	614	397.346
FLJ20618	572	9.87334e-09	0.130823	1443	0.1744	1002	0.110446	929	0.08844	951	0.022154	186	1477.06
TOR1B	573	9.87691e-09	0.11627	1220	0.0986	332	0.0542961	275	0.104	1264	0.0762938	1522	529.635
PIK3C2A	574	9.88754e-09	0.0481836	175	0.2107	1328	0.0596756	328	0.14956	2000	0.0545667	1028	844.212
PFDN2	575	9.89906e-09	0.175621	1994	0.08738	247	0.0825415	598	0.0658	505	0.0593912	1144	1059.54
GPAA1	576	9.92563e-09	0.308892	2974	0.10796	412	0.0730659	474	0.05954	393	0.0342121	462	1019.58
KPNA6	577	9.92573e-09	0.100239	959	0.2014	1237	0.134249	1184	0.06882	556	0.0266107	283	1140.54
TOPBP1	578	9.96056e-09	0.157592	1791	0.11708	480	0.0843223	619	0.06846	550	0.0467631	800	348.846
PSMD1	579	9.96339e-09	0.0495601	194	0.12952	598	0.107147	880	0.10362	1255	0.0699083	1375	1692.67
NUP153	580	9.98584e-09	0.117949	1265	0.10994	431	0.0899697	696	0.0784	744	0.054593	1029	396.404
TEX27	581	1.00145e-08	0.0422758	109	0.22816	1459	0.216783	1910	0.0699	576	0.0342619	463	2016.63
MYCBP	582	1.00609e-08	0.189396	2155	0.12546	557	0.0598357	332	0.09828	1155	0.0360038	507	403.923
E46L	583	1.00624e-08	0.170864	1940	0.12944	597	0.113355	971	0.05792	355	0.0346522	475	2813.46
PEX12	584	1.00705e-08	0.0553074	271	0.10552	387	0.0909341	704	0.10688	1311	0.0887821	1800	529.346
LSM2	585	1.00722e-08	0.196006	2231	0.11476	468	0.144833	1287	0.0442	177	0.0349774	479	534.038
FLJ13855	586	1.01204e-08	0.0305749	41	0.1944	1182	0.089189	687	0.13058	1706	0.0731075	1452	1772.02
COX5B	587	1.01228e-08	0.501826	3397	0.11854	495	0.0780194	547	0.04672	206	0.0233448	214	6763.81
ARHGAP1	588	1.01367e-08	0.249033	2677	0.12576	561	0.0621885	355	0.07638	689	0.034074	460	2019.5
TINF2	589	1.01439e-08	0.174267	1986	0.09056	270	0.0598055	330	0.0758	677	0.0709023	1398	174.577
CLCN7	590	1.01583e-08	0.0874006	762	0.18478	1097	0.122242	1064	0.06838	549	0.0376283	547	842.077
ZW10	591	1.01827e-08	0.0392975	88	0.16884	950	0.125795	1099	0.07294	629	0.0836392	1687	999.135
DKFZP586M1120	592	1.02175e-08	0.0744075	551	0.15368	799	0.260099	2170	0.04688	210	0.0366437	521	398.173
HRBL	593	1.02893e-08	0.132272	1458	0.12406	543	0.100079	805	0.0638	459	0.049106	876	455.365
MGC15396	594	1.03967e-08	0.402455	3244	0.15386	802	0.0604882	338	0.06406	467	0.0216677	179	142.423
PHF3	595	1.0466e-08	0.147503	1659	0.14316	722	0.0628616	366	0.09932	1176	0.0396962	593	472.25
RPS25	596	1.05194e-08	0.0909465	815	0.23718	1549	0.161378	1449	0.04796	228	0.0315077	402	2867.13
NDE1	597	1.05557e-08	0.222998	2478	0.10912	426	0.0937735	734	0.06438	479	0.0359307	505	520.865
PQBP1	598	1.05803e-08	0.137103	1526	0.14026	701	0.136794	1210	0.06338	448	0.0317332	407	542.365
PTPN4	599	1.06218e-08	0.146909	1654	0.0969	322	0.0822369	595	0.067	524	0.0677173	1332	462.231
TFPT	600	1.07042e-08	0.26109	2748	0.0957	312	0.0872416	670	0.06146	421	0.0399531	597	427.5
NDP52	601	1.07119e-08	0.0545383	258	0.15254	788	0.0778524	545	0.0993	1175	0.0832863	1682	816.673
TAS2R16	602	1.07185e-08	0.0580953	318	0.11276	449	0.136746	1207	0.07418	650	0.0806584	1613	393.154
DRD5	603	1.07496e-08	0.0435067	125	0.13928	694	0.151699	1354	0.08152	817	0.0717321	1421	1002.6
GA17	604	1.08651e-08	0.0695008	481	0.20904	1306	0.123289	1074	0.08466	878	0.0358285	502	705.25
FLJ37659	605	1.08716e-08	0.182595	2079	0.12504	553	0.119826	1044	0.0556	319	0.0357394	500	225.519
JM1	606	1.09364e-08	0.135684	1502	0.12146	520	0.0547325	282	0.08982	979	0.0675008	1325	210.423
HMGB1	607	1.10336e-08	0.275934	2831	0.137	668	0.0766945	530	0.06546	496	0.0290715	340	5938.85
CLTC	608	1.11238e-08	0.192707	2191	0.09284	287	0.0611435	342	0.08106	809	0.0627302	1221	5093.58
COPS3	609	1.1169e-08	0.186065	2122	0.1482	747	0.0868785	661	0.07402	646	0.031496	401	677.558
RAD21	610	1.11693e-08	0.0707706	500	0.1599	868	0.117504	1018	0.07528	666	0.0557968	1060	994.731
FLJ20241	611	1.11744e-08	0.132837	1463	0.12518	555	0.116714	1011	0.0643	475	0.0447766	739	373.423
RPL22	612	1.1269e-08	0.118571	1272	0.18204	1070	0.203404	1817	0.04772	223	0.0268964	289	5508.73
WDR12	613	1.12834e-08	0.079967	641	0.13166	620	0.0652119	390	0.1036	1254	0.0793236	1584	759.173
STAT6	614	1.12943e-08	0.188462	2147	0.1118	445	0.0957832	761	0.069	560	0.0405575	609	894.923
CKLFSF7	615	1.14516e-08	0.170251	1931	0.09594	314	0.126903	1112	0.06024	407	0.0458599	774	718.558
CSRP2BP	616	1.15223e-08	0.0493527	190	0.20324	1255	0.113759	978	0.1099	1373	0.0459464	777	554.654
FLJ10407	617	1.16651e-08	0.12366	1344	0.13246	632	0.0976311	778	0.09248	1036	0.0394418	589	229.808
UBN1	618	1.17857e-08	0.0669606	437	0.1179	488	0.104055	842	0.08534	898	0.0840661	1698	840.962
STUB1	619	1.18839e-08	0.106938	1071	0.16412	905	0.134178	1183	0.06936	569	0.0363825	514	2668.4
ANAPC11	620	1.19151e-08	0.167964	1906	0.1477	743	0.140033	1243	0.06004	401	0.0285658	324	1824.4
PHTF2	621	1.19214e-08	0.105986	1051	0.18612	1110	0.289671	2331	0.05486	310	0.0190169	141	256.538
DIAPH2	622	1.19455e-08	0.0911162	821	0.15674	838	0.0688922	441	0.12382	1594	0.0490325	868	649.365
GAK	623	1.19699e-08	0.0763872	574	0.1354	653	0.110975	941	0.07954	774	0.0655626	1275	1736.67
CGI-72	624	1.20005e-08	0.0427066	113	0.19158	1159	0.161279	1444	0.09262	1040	0.0491007	875	798.635
RPL27	625	1.20136e-08	0.108693	1102	0.15912	860	0.0983036	785	0.09326	1056	0.0378878	555	9000.35
SNAPC5	626	1.20217e-08	0.116384	1223	0.19296	1171	0.109881	919	0.08868	958	0.0274708	300	589.019
SCP2	627	1.20346e-08	0.0933587	846	0.30324	1984	0.163867	1470	0.0876	942	0.0148084	73	1139.83
ATP5C1	628	1.2043e-08	0.155204	1762	0.11678	477	0.0549017	286	0.09024	985	0.0670645	1311	4362.21
PCF11	629	1.20571e-08	0.0814057	671	0.1564	831	0.0745937	502	0.10326	1248	0.0614797	1190	356.519
TAF2	630	1.21616e-08	0.117471	1247	0.17538	1009	0.130698	1155	0.072	613	0.0313687	397	324
FLJ14753	631	1.21743e-08	0.057536	311	0.15342	796	0.0790096	561	0.09628	1105	0.0906611	1826	1122.83
ELP3	632	1.21802e-08	0.0960003	896	0.12254	529	0.109116	910	0.08058	799	0.0588851	1134	335.173
LTA4H	633	1.21903e-08	0.0947396	873	0.13856	681	0.0820889	592	0.08716	929	0.064902	1265	806.038
SH3GL3	634	1.22255e-08	0.133709	1472	0.12072	514	0.0934395	725	0.07672	698	0.052833	979	2137.29
C1GALT1	635	1.22639e-08	0.0947533	874	0.17678	1026	0.068683	437	0.1028	1234	0.0518528	944	238.75
TCEB1	636	1.22919e-08	0.121698	1312	0.1283	587	0.075065	506	0.09694	1121	0.0540985	1013	1534.96
CDIPT	637	1.23009e-08	0.157732	1792	0.13292	637	0.156714	1408	0.05834	369	0.0320898	419	2081.67
FXC1	638	1.23032e-08	0.0372922	72	0.16134	883	0.121535	1057	0.08514	891	0.0988185	1961	516.846
HSPC163	639	1.23088e-08	0.264089	2767	0.16428	906	0.0399506	156	0.09502	1083	0.0373729	538	188.481
METTL3	640	1.23226e-08	0.180896	2065	0.2254	1434	0.122994	1069	0.05998	400	0.0204853	159	692.904
CDC40	641	1.23235e-08	0.1748	1989	0.1803	1049	0.176619	1605	0.06174	425	0.0179311	122	591
SET7	642	1.23288e-08	0.101306	982	0.22278	1414	0.15136	1350	0.08058	800	0.0223968	194	863.462
XAB1	643	1.23338e-08	0.183386	2091	0.20466	1269	0.194804	1747	0.03386	74	0.0249132	250	495.827
BCAS2	644	1.23466e-08	0.156868	1779	0.12794	581	0.110175	923	0.06898	558	0.0404778	608	513.788
STIM2	645	1.24452e-08	0.169966	1927	0.09948	339	0.0618533	349	0.09302	1049	0.0639704	1247	255.827
PPP2R5A	646	1.24598e-08	0.154715	1751	0.12228	525	0.121521	1056	0.0575	344	0.0471327	813	798.192
ACVR1B	647	1.24637e-08	0.140431	1576	0.16354	900	0.0522789	260	0.10518	1278	0.0493533	888	1915.98
PPP1R15A	648	1.25062e-08	0.0862575	741	0.1391	691	0.0910766	705	0.0744	653	0.0769198	1537	825.769
DDAH2	649	1.26104e-08	0.403684	3246	0.11054	435	0.0514099	253	0.0805	796	0.0341459	461	491.481
URG4	650	1.26194e-08	0.178631	2034	0.10516	383	0.0661572	407	0.09374	1063	0.0541681	1018	698.558
RPL3	651	1.26598e-08	0.144704	1621	0.12118	517	0.125746	1097	0.04806	229	0.059738	1150	13209.3
KIAA1190	652	1.26766e-08	0.196609	2239	0.0888	257	0.0759598	523	0.07196	611	0.0664244	1299	348.808
FBXW1B	653	1.26823e-08	0.136637	1518	0.10504	382	0.0606751	339	0.10248	1226	0.0710624	1401	784.962
SNRPD1	654	1.26853e-08	0.0747832	556	0.1229	533	0.0842316	618	0.0975	1140	0.0840388	1696	375.923
SNRPG	655	1.26935e-08	0.116566	1226	0.15136	776	0.0928312	718	0.079	760	0.0490561	871	738.404
UNC84B	656	1.27056e-08	0.145087	1624	0.121	516	0.085083	637	0.07024	583	0.0605575	1169	1231.71
APBA2BP	657	1.27158e-08	0.186779	2129	0.16524	913	0.156018	1404	0.0533	290	0.0247749	246	947.769
FLJ10006	658	1.27245e-08	0.0507659	213	0.18034	1050	0.174982	1586	0.09696	1124	0.0409644	625	897.692
PEX26	659	1.27254e-08	0.0370813	68	0.18968	1145	0.215956	1903	0.08622	917	0.0485887	853	527.25
ZNF259	660	1.27629e-08	0.10628	1058	0.15498	814	0.0428062	181	0.12036	1531	0.0752055	1505	431.654
KHSRP	661	1.28034e-08	0.0692824	474	0.15672	837	0.0879968	674	0.07826	738	0.0856222	1734	866.673
USP4	662	1.28259e-08	0.0563632	292	0.27868	1836	0.0750463	505	0.09304	1050	0.0584797	1125	1154.42
ARF5	663	1.28368e-08	0.18847	2148	0.09698	323	0.105805	868	0.0787	750	0.0421762	667	1451.69
EIF3S10	664	1.28508e-08	0.121275	1304	0.17602	1017	0.0513921	252	0.08902	965	0.0658002	1281	561.269
LCMR1	665	1.28945e-08	0.0800955	644	0.1455	730	0.112873	965	0.08862	956	0.0553128	1051	1089.62
RNMT	666	1.29216e-08	0.112299	1158	0.16302	897	0.110676	936	0.08426	867	0.0378479	552	785.288
TUWD12	667	1.29762e-08	0.0905488	807	0.16746	937	0.058156	316	0.13762	1823	0.053468	987	241.712
DNAJA3	668	1.30196e-08	0.100258	960	0.10558	389	0.111886	954	0.07176	606	0.0766043	1528	1384.08
USP30	669	1.30846e-08	0.0950583	879	0.14148	712	0.119025	1038	0.10686	1310	0.0382505	561	462.385
QRSL1	670	1.3202e-08	0.0383751	78	0.25354	1665	0.167295	1510	0.08906	967	0.0455401	764	424.981
PHB	671	1.32433e-08	0.271779	2810	0.14026	702	0.0763747	528	0.07738	713	0.0293957	347	649.019
UBL5	672	1.34074e-08	0.117004	1235	0.1871	1119	0.100583	811	0.0817	825	0.0372679	534	1085
ELAVL2	673	1.34238e-08	0.242425	2636	0.09368	294	0.0787461	558	0.0609	415	0.0616337	1195	204.346
FASTK	674	1.35255e-08	0.399264	3236	0.09132	279	0.0927497	715	0.05494	312	0.0364035	515	1159.69
GPR21	675	1.35344e-08	0.101787	991	0.1457	732	0.106864	877	0.08534	899	0.0500401	903	1159.6
THEA	676	1.35748e-08	0.258506	2732	0.16016	871	0.120243	1047	0.04688	209	0.0290855	341	421.154
UBE1	677	1.36308e-08	0.0808501	660	0.19764	1209	0.154011	1382	0.0631	445	0.0438935	712	2541.37
PRKRIR	678	1.36317e-08	0.0585452	325	0.10224	363	0.0971092	772	0.10172	1212	0.115288	2185	624
LOC115509	679	1.36815e-08	0.271731	2809	0.1724	987	0.161259	1443	0.04576	194	0.0197909	149	653.5
TERF2	680	1.37952e-08	0.0736346	542	0.14872	755	0.108942	906	0.08602	914	0.0672199	1314	1056
PIGL	681	1.38534e-08	0.0478959	170	0.35496	2245	0.242838	2078	0.06156	424	0.027257	295	802.192
OPRS1	682	1.3864e-08	0.241919	2634	0.08386	226	0.0642399	376	0.07194	610	0.073944	1469	642.692
THAP4	683	1.39185e-08	0.111732	1150	0.17086	971	0.194059	1741	0.05836	371	0.0321913	423	1051.33
NDUFAB1	684	1.39561e-08	0.378492	3194	0.10562	390	0.0578221	312	0.05598	325	0.0539325	1005	3808.71
NDUFB3	685	1.39603e-08	0.142781	1602	0.12498	552	0.107529	887	0.06606	512	0.0550725	1040	1209
MGC10433	686	1.407e-08	0.108045	1090	0.12094	515	0.110955	940	0.08898	963	0.0545378	1026	682.077
SMAP1	687	1.4144e-08	0.178554	2031	0.11916	499	0.0718035	462	0.07584	678	0.0610441	1176	430.212
UNC5C	688	1.41535e-08	0.135437	1498	0.0929	289	0.067771	428	0.09544	1092	0.0869663	1760	149.538
MAPK9	689	1.41992e-08	0.112463	1162	0.22868	1467	0.196344	1765	0.07466	656	0.0188338	139	717.231
DAZAP2	690	1.42158e-08	0.172092	1953	0.1081	415	0.0534413	268	0.09894	1167	0.0722688	1438	2417.62
MGC10540	691	1.42639e-08	0.31326	2997	0.11028	433	0.0792825	563	0.06662	518	0.0390904	583	429.558
CRYGS	692	1.42867e-08	0.0979099	928	0.10798	413	0.0827068	601	0.09132	1009	0.0894682	1812	387.346
RAB1B	693	1.43539e-08	0.225569	2492	0.12662	570	0.0841681	616	0.06334	447	0.0471389	814	1018.19
SIRT2	694	1.43645e-08	0.125228	1369	0.11126	438	0.104991	858	0.07354	639	0.0667711	1305	2551.98
TRAPPC4	695	1.4391e-08	0.0760535	572	0.12966	601	0.0736952	491	0.11816	1508	0.0838051	1690	1271.37
FECH	696	1.43967e-08	0.0510269	218	0.18926	1142	0.0733894	483	0.1428	1911	0.071131	1405	794.538
FLJ20531	697	1.44009e-08	0.0570967	300	0.18334	1086	0.188916	1704	0.08382	861	0.0434431	699	966.654
CNOT7	698	1.44112e-08	0.0901174	800	0.14296	719	0.0736742	490	0.10938	1356	0.0694126	1366	968.058
MGC2477	699	1.44466e-08	0.224534	2485	0.1317	621	0.101038	817	0.05596	324	0.0432065	695	411.269
PSPC1	700	1.44514e-08	0.0725863	525	0.1826	1078	0.093669	731	0.09924	1173	0.0586526	1129	460.865
CAPNS1	701	1.44712e-08	0.244118	2644	0.17266	989	0.16258	1456	0.05278	285	0.0200074	152	3278.31
TFCP2	702	1.44943e-08	0.0783389	611	0.16278	892	0.17323	1571	0.065	488	0.0504774	914	833.308
SFRS9	703	1.44973e-08	0.0815279	673	0.14132	709	0.152263	1364	0.0669	523	0.0617694	1201	2365.62
ATP5J	704	1.44999e-08	0.159665	1813	0.12536	556	0.118496	1030	0.05042	252	0.0606323	1171	1887.75
OR2H1	705	1.45648e-08	0.194499	2214	0.10328	370	0.0580707	314	0.096	1098	0.0650366	1270	208.385
ARHGAP12	706	1.46185e-08	0.0795899	634	0.18192	1066	0.0895827	692	0.10272	1230	0.0548656	1035	491.519
MAPK12	707	1.46935e-08	0.104583	1036	0.16068	879	0.197407	1775	0.0657	501	0.0337122	450	920.288
MGC23937	708	1.47427e-08	0.0981873	933	0.11816	490	0.0838266	612	0.09284	1045	0.081649	1638	343.231
UQCRC1	709	1.47712e-08	0.793595	3537	0.08886	258	0.0341709	114	0.07776	721	0.0394196	588	2768.52
AP3S1	710	1.48014e-08	0.0973068	916	0.11978	507	0.0931291	720	0.0858	908	0.0794727	1593	2323.67
SLC25A5	711	1.48987e-08	0.256691	2716	0.08678	244	0.0600124	335	0.08412	866	0.066251	1296	3206.29
MPP5	712	1.49166e-08	0.0428486	117	0.18228	1074	0.124049	1079	0.09844	1158	0.0782068	1559	797.481
PPP1R11	713	1.49801e-08	0.0513188	224	0.14824	749	0.104206	846	0.1174	1505	0.0804871	1608	2307.67
FLJ10871	714	1.50634e-08	0.158256	1797	0.11144	442	0.0936106	729	0.07322	635	0.0623138	1211	537.288
MASA	715	1.50909e-08	0.208191	2340	0.18234	1075	0.0733672	481	0.07002	579	0.0386956	576	981.673
BET1	716	1.51615e-08	0.0669204	436	0.17274	990	0.118695	1033	0.09494	1081	0.0582	1118	354.827
PSMB1	717	1.51988e-08	0.0466621	153	0.14766	741	0.184364	1674	0.0786	747	0.0761202	1518	3215.75
ATP5F1	718	1.52213e-08	0.128659	1427	0.13214	628	0.0946963	748	0.07586	679	0.0623229	1212	2439.27
PSMB6	719	1.52816e-08	0.184127	2100	0.12622	565	0.103194	833	0.07438	651	0.0428378	686	1320.9
KIAA0652	720	1.53285e-08	0.0672052	440	0.16868	949	0.232805	2019	0.0584	373	0.0497329	899	1851.96
HEY1	721	1.53355e-08	0.141529	1586	0.1821	1072	0.103642	836	0.0855	904	0.0335781	446	1391.98
RRM2B	722	1.53935e-08	0.243675	2643	0.10698	403	0.0868746	660	0.07132	597	0.0476581	832	182.212
TINP1	723	1.54087e-08	0.0777349	599	0.2052	1273	0.164491	1479	0.07644	692	0.0384171	566	1327.73
ANKRA2	724	1.55379e-08	0.0550694	266	0.21738	1373	0.227656	1987	0.1053	1282	0.0270751	293	437.212
LSM10	725	1.55742e-08	0.158852	1804	0.12438	548	0.126331	1108	0.05802	360	0.053776	1002	904.115
PP591	726	1.55959e-08	0.0903185	802	0.1635	899	0.0982579	783	0.0778	724	0.069085	1358	510.808
FVT1	727	1.55969e-08	0.117717	1257	0.16932	957	0.136996	1212	0.0816	820	0.0350031	481	598.404
MGC8407	728	1.56366e-08	0.258678	2736	0.13646	661	0.142771	1266	0.05302	289	0.0292626	344	1744.37
CHERP	729	1.5682e-08	0.149413	1680	0.17992	1047	0.168662	1528	0.06804	539	0.0254196	259	756.308
VAPA	730	1.57234e-08	0.106551	1062	0.20828	1296	0.115454	999	0.07402	647	0.0414569	644	2539.4
UGCGL2	731	1.57401e-08	0.198189	2254	0.19948	1222	0.176955	1607	0.03838	128	0.0293141	346	255.942
APXL	732	1.57844e-08	0.0539716	252	0.1977	1210	0.295696	2353	0.07996	780	0.0312861	394	853.692
DKFZP434B0335	733	1.58803e-08	0.358621	3135	0.0902	268	0.0853124	641	0.06418	473	0.0448354	744	267.442
FLJ13448	734	1.59358e-08	0.0348604	60	0.18876	1138	0.110739	939	0.11326	1431	0.0965541	1932	949.981
FLJ10849	735	1.59713e-08	0.161694	1832	0.17094	973	0.0339953	113	0.13684	1809	0.0621134	1210	953.096
NOLC1	736	1.60314e-08	0.0895291	793	0.11738	483	0.0927411	714	0.09324	1055	0.0882172	1786	1101.33
PABPN1	737	1.61882e-08	0.0726156	527	0.18576	1105	0.130078	1149	0.10892	1344	0.0423565	670	3338.63
SUGT1	738	1.62887e-08	0.143942	1616	0.19488	1186	0.0655424	396	0.10526	1281	0.0420883	663	451.077
KIAA0483	739	1.6326e-08	0.0308114	42	0.18546	1103	0.118856	1036	0.11338	1435	0.106017	2056	429.788
NIPA2	740	1.64184e-08	0.174845	1990	0.29872	1957	0.125211	1095	0.05886	381	0.0213287	175	637.019
KIAA1712	741	1.64384e-08	0.0751812	561	0.3484	2215	0.190202	1713	0.06998	578	0.0235776	217	325.346
RPS29	742	1.65893e-08	0.198067	2251	0.11336	454	0.0625163	362	0.07728	712	0.0764734	1525	9267.56
ATF2	743	1.65968e-08	0.132905	1465	0.14696	736	0.0750667	507	0.10092	1197	0.0560887	1066	458.404
RAP1A	744	1.66595e-08	0.209941	2359	0.1554	821	0.0802643	574	0.07686	702	0.041391	641	1190.06
RPS23	745	1.67233e-08	0.118187	1269	0.11714	481	0.0750388	504	0.10284	1236	0.0782736	1562	9534.12
PRKAG1	746	1.67282e-08	0.112425	1161	0.16018	872	0.0901262	697	0.09198	1023	0.0560337	1063	1059.62
MTCP1	747	1.68538e-08	0.204118	2302	0.10762	408	0.0641817	374	0.0939	1067	0.0636592	1238	557.5
MRPL33	748	1.69106e-08	0.15139	1704	0.12574	560	0.164227	1473	0.0623	437	0.0434182	698	1573.48
EMILIN3	749	1.72169e-08	0.0872073	759	0.15216	784	0.0757397	518	0.12704	1648	0.0674301	1322	182.712
MKRN2	750	1.72453e-08	0.113908	1183	0.13282	636	0.082823	602	0.08428	869	0.0816571	1639	360.654
PIP5K1A	751	1.72793e-08	0.0650573	406	0.2425	1584	0.458549	2821	0.04246	158	0.0281299	314	972.442
CDS2	752	1.72927e-08	0.123913	1346	0.27834	1833	0.207652	1848	0.05904	386	0.0204505	157	613.827
FLJ20308	753	1.72984e-08	0.0658807	418	0.16724	933	0.205923	1834	0.0778	725	0.0490049	867	3326
ZNF84	754	1.73149e-08	0.241058	2621	0.12292	534	0.0798983	566	0.08736	934	0.041864	656	109.327
FLJ13614	755	1.73391e-08	0.176355	2003	0.12286	532	0.155339	1398	0.0578	351	0.044569	735	121.885
TFDP1	756	1.74052e-08	0.163334	1847	0.12396	542	0.0660214	403	0.08804	948	0.0739558	1470	567.615
KIAA0157	757	1.74083e-08	0.15164	1707	0.14316	723	0.115739	1002	0.06874	553	0.0504021	910	423
WBSCR1	758	1.74295e-08	0.152437	1721	0.1595	864	0.124411	1084	0.06606	513	0.0436164	702	2575.06
SDCCAG8	759	1.744e-08	0.167009	1897	0.15748	848	0.0735104	486	0.10228	1222	0.0441017	715	1562.46
PTPN9	760	1.74572e-08	0.09032	803	0.14766	742	0.142475	1262	0.05824	365	0.078883	1573	759.788
TBP	761	1.7496e-08	0.209904	2358	0.1548	813	0.0619645	352	0.0835	852	0.0520396	954	480.135
TIMM9	762	1.75173e-08	0.0419547	106	0.2142	1349	0.201637	1804	0.07602	684	0.0635896	1236	900
ARHGAP10	763	1.75549e-08	0.0827335	696	0.1542	805	0.109777	918	0.09688	1119	0.0646997	1262	315.558
KIAA0763	764	1.75856e-08	0.256997	2717	0.15502	815	0.136521	1204	0.06302	444	0.0256554	267	1396.23
WDR5B	765	1.76054e-08	0.0946266	869	0.19648	1197	0.0707846	455	0.10944	1359	0.0611243	1179	461.808
LSM8	766	1.76144e-08	0.206202	2314	0.18298	1084	0.0845154	624	0.06562	499	0.0420933	664	244.288
C1QTNF7	767	1.77064e-08	0.205772	2312	0.08506	236	0.0982695	784	0.0654	494	0.0787111	1570	96.6731
LOC56270	768	1.7753e-08	0.104521	1033	0.1655	914	0.182514	1660	0.06924	566	0.0406099	611	1620.83
PPP4R1	769	1.7771e-08	0.15673	1777	0.1133	453	0.0800035	568	0.09088	994	0.0688283	1354	724.808
COG2	770	1.79781e-08	0.0406804	97	0.30934	2026	0.297865	2358	0.0798	778	0.030055	362	935.865
FLJ20436	771	1.81164e-08	0.307281	2966	0.11946	504	0.0647217	382	0.07804	733	0.048861	861	302.577
HT007	772	1.82731e-08	0.126595	1390	0.17	964	0.0689581	443	0.10658	1298	0.0577699	1105	1159.23
DNM2	773	1.83533e-08	0.184251	2101	0.16314	898	0.0682586	431	0.10682	1305	0.0418744	657	378.712
FLJ25005	774	1.83898e-08	0.142808	1603	0.16074	881	0.086887	662	0.07534	669	0.0611977	1183	533.519
TARDBP	775	1.8405e-08	0.0869535	751	0.1395	697	0.0657606	399	0.13332	1756	0.0865424	1751	777.365
LIMD1	776	1.84056e-08	0.0872054	758	0.1747	1006	0.145529	1297	0.08204	831	0.0506002	920	660.462
MPP1	777	1.84262e-08	0.149503	1682	0.2836	1866	0.357471	2581	0.06434	478	0.0094487	23	692.596
PSMD11	778	1.84867e-08	0.0537815	250	0.1379	676	0.115571	1000	0.12136	1550	0.0888692	1802	824.192
KIAA0052	779	1.85298e-08	0.0667298	433	0.2086	1300	0.0686995	438	0.11384	1445	0.0851144	1722	665.192
FLJ10647	780	1.85897e-08	0.421488	3285	0.12822	585	0.0389503	141	0.0899	980	0.049122	877	144.038
TFE3	781	1.8695e-08	0.134985	1494	0.1827	1080	0.207805	1851	0.0635	452	0.0287267	328	511.481
MYNN	782	1.8722e-08	0.118021	1266	0.14812	746	0.0757063	516	0.09698	1126	0.0729423	1448	304.962
CGI-09	783	1.87823e-08	0.0505533	212	0.19014	1151	0.111833	952	0.12794	1665	0.0682913	1344	262.615
SEC14L2	784	1.88463e-08	0.24198	2635	0.10966	430	0.123093	1070	0.05824	364	0.0495404	893	391.115
UBE2H	785	1.89631e-08	0.129917	1432	0.17802	1032	0.0639044	372	0.10802	1332	0.0593955	1145	860.115
GNAS	786	1.90505e-08	0.149183	1677	0.14928	761	0.111121	944	0.07828	741	0.0491759	880	18071.9
ATP5L	787	1.9114e-08	0.204723	2306	0.14702	737	0.0887209	684	0.06882	555	0.0520096	951	3388.62
P38IP	788	1.91272e-08	0.286327	2890	0.1203	511	0.0563857	300	0.08726	932	0.056436	1076	779.731
MBIP	789	1.91869e-08	0.141818	1588	0.08786	250	0.0895482	689	0.09232	1031	0.0931416	1875	164.288
APG5L	790	1.9198e-08	0.0342731	57	0.17062	969	0.108229	894	0.14256	1906	0.106401	2065	481.865
SNX13	791	1.92054e-08	0.0440961	129	0.1835	1087	0.0627094	365	0.17624	2357	0.10739	2087	568.673
LANCL2	792	1.92088e-08	0.183659	2095	0.16456	908	0.127765	1121	0.07782	728	0.0319649	416	550
ZFR	793	1.9276e-08	0.192182	2181	0.13218	629	0.084068	613	0.09264	1041	0.0487219	858	1255.83
RARSL	794	1.9288e-08	0.140396	1575	0.19274	1168	0.0418476	171	0.1141	1449	0.0746484	1493	525.269
MRPL48	795	1.94424e-08	0.142695	1601	0.1699	962	0.157111	1412	0.0623	436	0.0409701	626	593.519
FLJ22624	796	1.95581e-08	0.12498	1364	0.19868	1215	0.342226	2525	0.04776	224	0.0240974	227	326.308
UQCRFS1	797	1.95651e-08	0.325406	3046	0.1185	494	0.0714196	460	0.07468	657	0.0475699	829	4168.44
ARFIP1	798	1.96067e-08	0.103368	1011	0.16642	922	0.108012	892	0.10146	1208	0.0520073	950	339.712
HT036	799	1.97201e-08	0.234137	2560	0.13876	686	0.0824838	597	0.07414	649	0.0496328	896	877.385
MADP-1	800	1.97284e-08	0.306226	2962	0.15462	811	0.134603	1188	0.0489	237	0.0316545	406	1231.73
GNA11	801	1.97297e-08	0.0681035	452	0.29074	1911	0.190621	1717	0.09064	990	0.0288384	333	1642.46
NDEL1	802	1.97688e-08	0.209514	2352	0.09058	271	0.0650117	389	0.0991	1170	0.080851	1614	986.077
TP53AP1	803	1.97979e-08	0.148057	1663	0.1898	1148	0.155128	1393	0.08526	896	0.0266362	284	934.019
PSEN1	804	1.98052e-08	0.106253	1057	0.25308	1662	0.127242	1114	0.1037	1258	0.0279116	311	717.212
SITPEC	805	1.98137e-08	0.580946	3455	0.1017	358	0.127817	1122	0.04738	216	0.027691	308	397.423
FLJ12517	806	1.98272e-08	0.214837	2405	0.17862	1037	0.331571	2487	0.03402	75	0.0229048	210	186.346
FKBP9	807	1.98303e-08	0.12589	1382	0.20592	1275	0.200207	1795	0.0732	634	0.0261014	276	881.808
MAN1A2	808	1.98686e-08	0.140038	1572	0.10818	416	0.080714	581	0.07806	734	0.10409	2033	1142.56
HSA9761	809	1.9875e-08	0.0686099	463	0.15518	817	0.0933139	721	0.09722	1128	0.102896	2019	570.577
DKFZP564A022	810	1.99268e-08	0.181892	2075	0.15654	833	0.0719606	464	0.08018	787	0.0606532	1172	171.212
NOL5A	811	1.99302e-08	0.0671049	439	0.14976	764	0.184209	1672	0.07498	661	0.0717993	1423	1158.52
FLJ12529	812	1.99891e-08	0.054849	263	0.20888	1304	0.160664	1437	0.08802	947	0.0616943	1199	1467.79
GCAT	813	2.00398e-08	0.228314	2519	0.11466	466	0.108305	897	0.06354	454	0.0556248	1058	924.288
MMRP19	814	2.01261e-08	0.104132	1027	0.22846	1463	0.151264	1349	0.07908	763	0.0353654	489	298.481
DJ122O8.2	815	2.02077e-08	0.127209	1404	0.17326	993	0.0966364	765	0.08862	955	0.0535354	991	172.154
FBXL7	816	2.02661e-08	0.0548497	264	0.20334	1256	0.105707	866	0.1134	1436	0.0758003	1513	646.077
TTF1	817	2.02694e-08	0.0781963	610	0.1895	1144	0.138739	1229	0.11272	1425	0.0437382	705	443.962
FLJ22313	818	2.0337e-08	0.0771217	585	0.221	1402	0.0926292	713	0.12572	1626	0.0512368	931	255.538
KIF3B	819	2.03592e-08	0.147658	1660	0.17676	1025	0.0989054	789	0.0922	1028	0.0427746	681	697.558
STXBP3	820	2.0396e-08	0.201272	2279	0.2282	1462	0.07828	553	0.08046	793	0.0352559	485	388.442
GTF2F1	821	2.04683e-08	0.0383653	77	0.37954	2364	0.240085	2062	0.08212	832	0.0356523	498	787.865
ZFYVE20	822	2.05293e-08	0.0679902	450	0.23598	1537	0.237529	2047	0.07542	671	0.0357163	499	135.365
USP10	823	2.05313e-08	0.063125	378	0.2071	1287	0.120713	1050	0.12198	1566	0.0533345	984	490.462
PXMP3	824	2.05984e-08	0.0706272	497	0.14912	760	0.100916	815	0.11816	1509	0.0820183	1648	414.885
ARHGDIA	825	2.06586e-08	0.110374	1130	0.17962	1045	0.0544431	277	0.14852	1981	0.0644415	1255	2331.87
BRD7	826	2.06748e-08	0.272837	2817	0.11844	493	0.0480815	226	0.10352	1253	0.0642767	1252	307.077
RY1	827	2.09869e-08	0.0833869	704	0.27706	1823	0.114574	985	0.0806	801	0.0491895	882	777.962
SMS	828	2.10333e-08	0.0932955	845	0.13908	690	0.12342	1076	0.09128	1006	0.0719509	1427	569.058
PHIP	829	2.10788e-08	0.228229	2516	0.12652	569	0.0845313	625	0.09108	1000	0.0474122	824	392.538
ATPAF1	830	2.12414e-08	0.0467698	154	0.2213	1404	0.0860397	653	0.13612	1801	0.0876256	1775	1429.5
PAIP1	831	2.1274e-08	0.135825	1505	0.1283	588	0.0734606	485	0.10778	1330	0.0771021	1540	971.846
HT014	832	2.12972e-08	0.312378	2990	0.13178	623	0.066664	416	0.07502	662	0.0517297	940	411.269
DTNBP1	833	2.13261e-08	0.513662	3408	0.1618	886	0.0828572	603	0.09382	1065	0.0165061	94	327.115
ESD	834	2.13369e-08	0.0681803	453	0.22962	1479	0.181525	1646	0.08498	885	0.0441798	718	1927.48
ZNF263	835	2.13577e-08	0.0208672	4	0.27728	1825	0.167396	1515	0.1211	1546	0.0910535	1838	642.788
RPL23	836	2.1402e-08	0.172554	1963	0.16048	875	0.113207	969	0.06768	534	0.0504417	912	4447.29
ASB1	837	2.14366e-08	0.043247	123	0.19896	1218	0.14816	1319	0.1166	1490	0.0721139	1433	1337.44
ATP6V1G1	838	2.1464e-08	0.0672458	442	0.12774	579	0.150203	1333	0.09824	1154	0.0846773	1713	1497.54
NDUFA8	839	2.14698e-08	0.165183	1872	0.1744	1003	0.113242	970	0.0803	790	0.0409835	627	2215.17
UBB	840	2.14893e-08	0.101662	990	0.13234	631	0.129449	1142	0.07228	620	0.0853634	1729	26083.4
SCLY	841	2.16207e-08	0.151505	1705	0.17532	1008	0.139865	1239	0.06284	443	0.0463106	787	980.404
MGC61550	842	2.17099e-08	0.119401	1284	0.13664	663	0.127359	1117	0.07132	598	0.0732564	1457	408.865
GIT1	843	2.17706e-08	0.0855652	729	0.15238	787	0.182704	1661	0.0805	798	0.0567698	1081	893.731
ZNF239	844	2.17748e-08	0.0489405	182	0.15546	823	0.140912	1249	0.107	1315	0.0949185	1898	456.712
CKLFSF1	845	2.17864e-08	0.767627	3531	0.13762	675	0.147254	1314	0.03674	112	0.0190617	142	314.269
RPN2	846	2.18724e-08	0.225576	2493	0.09198	283	0.0654774	394	0.10146	1207	0.0793486	1587	1679.96
CBX6	847	2.1901e-08	0.309519	2979	0.15608	828	0.0925455	711	0.07782	727	0.0314774	400	2389.04
ARL6IP2	848	2.19507e-08	0.0498004	199	0.18484	1098	0.0803444	575	0.14032	1863	0.105769	2050	619.865
RPL15	849	2.19768e-08	0.115597	1204	0.16714	931	0.085736	646	0.0903	987	0.073469	1461	8170.33
RNF3	850	2.19807e-08	0.110873	1139	0.21442	1352	0.161478	1450	0.08946	974	0.0320054	418	515.288
UMPS	851	2.20004e-08	0.0759716	571	0.1373	672	0.0971824	773	0.12002	1528	0.0904238	1822	458.635
GL004	852	2.20438e-08	0.151125	1700	0.177	1027	0.102272	824	0.08402	863	0.0479567	839	1035.96
HSA272196	853	2.2122e-08	0.273326	2821	0.19818	1213	0.136929	1211	0.0477	222	0.0312668	393	3124.9
FLJ13213	854	2.21666e-08	0.0926207	839	0.16172	885	0.119626	1041	0.10858	1338	0.0569729	1086	462.192
PPP2CA	855	2.22133e-08	0.201244	2277	0.178	1031	0.0621029	353	0.09256	1039	0.0539449	1006	1377.44
LOC136263	856	2.22345e-08	0.281024	2859	0.12588	562	0.0436022	193	0.13454	1780	0.0535775	994	93.8269
LSM5	857	2.22371e-08	0.0618986	372	0.22404	1422	0.217978	1921	0.08628	918	0.0426348	677	388.788
DDX47	858	2.22418e-08	0.178173	2025	0.17938	1043	0.143263	1276	0.06898	559	0.0352137	483	521.981
DSCAML1	859	2.22656e-08	0.163597	1849	0.17148	978	0.218408	1924	0.0471	211	0.0385808	569	334.385
TRIAD3	860	2.22885e-08	0.0713167	507	0.24942	1635	0.155916	1401	0.09174	1018	0.0438051	709	738.365
ARF3	861	2.25186e-08	0.206928	2327	0.15764	849	0.0994987	797	0.07348	638	0.0472156	817	3100.77
FLJ21103	862	2.25369e-08	0.2337	2557	0.12888	592	0.0884039	680	0.09696	1123	0.0436517	704	410.788
WDFY1	863	2.26101e-08	0.0398342	93	0.1526	789	0.123246	1072	0.1162	1484	0.129875	2375	859.038
ZNF434	864	2.26312e-08	0.0571391	301	0.18764	1123	0.102824	830	0.14126	1884	0.0726689	1444	787.75
ZNF297B	865	2.27209e-08	0.0773627	591	0.20214	1246	0.124718	1088	0.12396	1598	0.0469946	809	596.154
NDUFB8	866	2.2731e-08	0.208204	2341	0.28628	1882	0.238319	2050	0.04652	204	0.0172011	102	3393.52
HT008	867	2.27768e-08	0.206687	2323	0.17574	1015	0.134899	1190	0.06726	527	0.0345588	473	1179.37
XRCC1	868	2.28542e-08	0.155086	1759	0.17896	1040	0.207887	1853	0.0791	765	0.0250408	254	262.038
UBE2V2	869	2.28681e-08	0.146659	1649	0.16864	948	0.0724402	470	0.11228	1415	0.0568452	1084	353.596
SF3B1	870	2.30702e-08	0.162204	1837	0.12234	528	0.0545127	278	0.14084	1877	0.0757208	1511	2096.48
SHANK2	871	2.31552e-08	0.170606	1936	0.13688	667	0.0536588	272	0.12958	1692	0.07131	1412	749.058
UBL3	872	2.32531e-08	0.265996	2778	0.10502	381	0.0663989	409	0.07828	740	0.0800825	1601	1531.79
CAMLG	873	2.3261e-08	0.186881	2134	0.20516	1272	0.1074	884	0.0804	792	0.0351339	482	1174.79
FLJ11280	874	2.337e-08	0.331077	3065	0.13618	657	0.0664895	411	0.09552	1093	0.0408117	621	865.692
MGC21416	875	2.34425e-08	0.0429605	120	0.27206	1788	0.197509	1778	0.07476	658	0.0679249	1336	634.519
RAD51L3	876	2.34809e-08	0.0261147	17	0.17898	1041	0.166915	1503	0.11162	1405	0.134835	2421	463.019
PPP1CC	877	2.35153e-08	0.189869	2160	0.11738	484	0.0875613	671	0.08076	803	0.0746122	1492	1860.79
HMG2L1	878	2.36237e-08	0.122504	1325	0.16836	946	0.237258	2043	0.06438	480	0.0374974	543	601.827
ELF2	879	2.36549e-08	0.078043	606	0.11546	471	0.097928	780	0.10422	1269	0.128621	2362	754.923
KIAA1055	880	2.36711e-08	0.056705	295	0.21284	1340	0.151654	1353	0.13186	1730	0.0490446	869	820.769
AP1S2	881	2.36975e-08	0.117761	1261	0.1518	782	0.0719922	465	0.1311	1715	0.0702354	1383	816.346
H326	882	2.3875e-08	0.0585512	326	0.21608	1363	0.0996533	799	0.11652	1489	0.0812674	1627	600.423
MGC10870	883	2.38786e-08	0.0599693	348	0.27292	1794	0.393472	2684	0.0592	389	0.0313202	395	577.346
STK38L	884	2.3901e-08	0.054156	254	0.18776	1124	0.129517	1144	0.10992	1374	0.0825615	1661	622.712
ILKAP	885	2.40232e-08	0.158509	1801	0.11922	500	0.110656	935	0.09164	1016	0.0626876	1219	372.019
APLP2	886	2.4043e-08	0.165037	1869	0.13834	678	0.0945531	747	0.08302	842	0.0670834	1312	3838.77
RPF1	887	2.40589e-08	0.0987899	942	0.19182	1160	0.118148	1025	0.09168	1017	0.0586114	1128	621.635
TRAP1	888	2.40636e-08	0.0905312	806	0.16206	887	0.134636	1189	0.08878	959	0.0686162	1349	1988.35
KLHDC3	889	2.43109e-08	0.0822815	685	0.27452	1801	0.360398	2590	0.05196	267	0.0287401	329	1851.31
CSNK1G1	890	2.43125e-08	0.162039	1836	0.15526	818	0.192662	1731	0.06476	482	0.0387314	577	397.596
EIF3S2	891	2.43183e-08	0.0703871	492	0.30308	1983	0.215923	1902	0.06836	547	0.0386187	571	1606.94
HKE2	892	2.43287e-08	0.0801339	645	0.23454	1524	0.115345	994	0.09566	1095	0.0586643	1130	516.25
HINT2	893	2.43383e-08	0.25007	2679	0.1405	703	0.121558	1059	0.06432	477	0.0443035	724	1039.48
CIZ1	894	2.43982e-08	0.221312	2461	0.1263	567	0.0460059	215	0.10942	1358	0.0867072	1755	587.962
DKFZP586L0724	895	2.44521e-08	0.0393604	89	0.20936	1311	0.107806	890	0.14396	1922	0.0956081	1911	531.846
HERC1	896	2.44562e-08	0.16473	1863	0.1676	938	0.0970891	771	0.10974	1369	0.0415742	647	968.212
ZNF45	897	2.44911e-08	0.093569	850	0.18788	1127	0.164485	1478	0.09656	1110	0.0438619	710	230.288
RPL10A	898	2.44952e-08	0.191281	2172	0.1363	659	0.114146	980	0.07906	762	0.0520608	955	2359.02
AFG3L2	899	2.45712e-08	0.0799069	639	0.25366	1668	0.153501	1375	0.09104	999	0.0433773	697	752.558
SARS	900	2.46757e-08	0.0809521	661	0.14748	738	0.108599	900	0.11718	1500	0.0812168	1624	2287.98
FLJ11184	901	2.46795e-08	0.1445	1618	0.1649	909	0.12992	1147	0.06344	449	0.0628381	1224	104.25
EIF3S6	902	2.46922e-08	0.178833	2037	0.12352	537	0.103788	838	0.07808	735	0.0689765	1356	1575.15
KHDRBS1	903	2.50763e-08	0.10349	1012	0.18178	1065	0.209518	1863	0.07058	589	0.0450745	751	1360.25
MJD	904	2.51235e-08	0.12287	1331	0.18058	1052	0.0954349	756	0.13928	1851	0.0425976	674	250.596
FTSJ2	905	2.51659e-08	0.0604321	355	0.22166	1410	0.206464	1837	0.08492	883	0.0535819	995	373.615
MRPS11	906	2.52849e-08	0.361144	3142	0.09008	267	0.0922095	710	0.06254	438	0.067396	1320	413.365
IHPK2	907	2.52887e-08	0.10383	1019	0.14152	713	0.0977371	779	0.10672	1302	0.0825082	1659	696.115
ANP32B	908	2.53739e-08	0.159262	1811	0.17912	1042	0.0648673	385	0.10016	1185	0.0684582	1347	1785.75
SRR	909	2.5441e-08	0.0486644	179	0.39016	2401	0.436132	2777	0.05832	368	0.0263427	280	861.481
ATP6V0C	910	2.54411e-08	0.170537	1933	0.13368	644	0.0926014	712	0.10336	1249	0.0583035	1121	7303.54
FLJ36754	911	2.55082e-08	0.114265	1186	0.14828	750	0.0799907	567	0.12142	1552	0.0775122	1546	154.904
PDCD6IP	912	2.55863e-08	0.116387	1224	0.18986	1149	0.0998478	801	0.10084	1195	0.057506	1099	1196.63
HCAP-G	913	2.56564e-08	0.305547	2958	0.08116	207	0.081516	586	0.07994	779	0.0793932	1589	189.788
AP3S2	914	2.57227e-08	0.100885	973	0.18594	1108	0.106674	875	0.08636	920	0.0744321	1485	1580.33
VDAC2	915	2.57644e-08	0.134836	1491	0.09458	303	0.108535	899	0.09142	1012	0.101816	2007	3130.69
GABARAPL2	916	2.58727e-08	0.21675	2417	0.09882	333	0.0871498	668	0.07376	641	0.0939647	1880	3201.19
ST7L	917	2.59149e-08	0.0867695	749	0.13116	613	0.177299	1612	0.06396	465	0.100411	1985	466.769
NDUFA10	918	2.59769e-08	0.13032	1435	0.15678	840	0.125793	1098	0.08902	966	0.056775	1082	1958.29
RPS6KA2	919	2.60567e-08	0.123602	1343	0.1504	767	0.146628	1308	0.08918	970	0.0536017	996	1030.65
BRD1	920	2.63426e-08	0.24472	2648	0.12262	530	0.104195	845	0.08346	850	0.0504796	915	644.788
LOC90736	921	2.63902e-08	0.0551773	267	0.2252	1432	0.145846	1302	0.13102	1714	0.0555771	1057	549.962
HCF-2	922	2.64531e-08	0.448165	3327	0.10552	388	0.0737004	492	0.0845	872	0.044915	747	348.154
NDUFV2	923	2.65083e-08	0.166839	1894	0.2515	1650	0.177335	1613	0.08926	971	0.0199578	150	1470.12
BTBD2	924	2.65884e-08	0.369012	3164	0.13706	669	0.141663	1254	0.04836	231	0.038372	564	423.327
ARF6	925	2.66415e-08	0.167304	1901	0.13652	662	0.0806573	580	0.0978	1143	0.0739418	1468	812.712
DBC-1	926	2.67608e-08	0.463194	3355	0.11432	462	0.0644275	378	0.09524	1088	0.041185	633	31.7308
ARCN1	927	2.68182e-08	0.124235	1348	0.15926	862	0.104609	852	0.08638	921	0.0750085	1500	758.135
FLJ20303	928	2.68622e-08	0.142455	1599	0.15438	808	0.129376	1140	0.096	1099	0.0491771	881	135.942
FLJ13386	929	2.69239e-08	0.101454	985	0.35502	2247	0.273807	2255	0.0581	362	0.0234969	215	271.769
CHST12	930	2.69412e-08	0.181657	2071	0.17504	1007	0.0736323	489	0.1045	1272	0.0550626	1039	143.942
FBXL11	931	2.71363e-08	0.145684	1634	0.13622	658	0.0653268	392	0.13264	1743	0.0789126	1575	897.731
MAPRE1	932	2.71651e-08	0.234597	2565	0.19036	1153	0.0508975	245	0.11128	1395	0.0537051	999	1049.85
POLR2K	933	2.7181e-08	0.0664266	430	0.23938	1566	0.132001	1168	0.11702	1497	0.0553367	1052	540.058
KIAA0828	934	2.72266e-08	0.11686	1232	0.16724	934	0.100614	812	0.08384	862	0.0825839	1662	733.038
SUPT5H	935	2.72766e-08	0.0954175	883	0.21044	1325	0.177214	1610	0.07014	580	0.0546494	1031	1234.35
SLC39A1	936	2.73172e-08	0.39134	3220	0.0965	319	0.0741525	498	0.07774	719	0.0627478	1222	261.577
ATP5J2	937	2.73932e-08	0.370403	3169	0.1312	614	0.0942959	741	0.06924	565	0.0431718	694	3171.02
ATP5G3	938	2.74021e-08	0.644352	3485	0.1283	589	0.0688542	440	0.07542	670	0.0319177	415	3876.54
MGC10233	939	2.74487e-08	0.0366219	67	0.1816	1063	0.131601	1164	0.11144	1400	0.140728	2489	806.154
MYL6	940	2.75491e-08	0.265776	2775	0.14276	717	0.191649	1725	0.06034	409	0.031397	398	3984.79
KIN	941	2.76046e-08	0.190361	2164	0.21148	1333	0.0806279	579	0.13942	1853	0.0305028	376	102.404
HNRPR	942	2.76518e-08	0.196433	2238	0.15028	766	0.079518	564	0.10274	1231	0.0573347	1093	1018.4
UBE2D2	943	2.79193e-08	0.176582	2007	0.25362	1667	0.0881485	676	0.11054	1384	0.031993	417	1103.79
ZNF232	944	2.80108e-08	0.117472	1248	0.26854	1768	0.151916	1358	0.07554	674	0.0386918	575	379.904
CTNND1	945	2.8061e-08	0.055216	270	0.18582	1106	0.194495	1744	0.08724	931	0.0806002	1611	849.827
MGC3248	946	2.8075e-08	0.0606042	358	0.20368	1259	0.139571	1237	0.10016	1186	0.0813567	1631	502.308
MAPK14	947	2.81071e-08	0.0273388	21	0.18402	1091	0.137548	1221	0.15838	2136	0.128242	2358	656.596
ALMS1	948	2.82103e-08	0.0613024	367	0.18786	1126	0.142426	1261	0.10996	1375	0.0782144	1560	1304.29
SNRPB2	949	2.8314e-08	0.123277	1336	0.17736	1028	0.154514	1387	0.07254	623	0.057774	1107	820.885
ADIPOR1	950	2.84368e-08	0.0414082	99	0.24452	1601	0.156004	1402	0.11112	1393	0.0810154	1617	1181.37
FLJ20331	951	2.84623e-08	0.0799806	642	0.22612	1444	0.123454	1077	0.14068	1873	0.0453133	759	782.904
SFRS10	952	2.86256e-08	0.121516	1309	0.2392	1563	0.0644331	379	0.17174	2302	0.0445034	733	1233.35
TANK	953	2.87248e-08	0.042881	119	0.241	1576	0.14279	1267	0.14764	1968	0.065931	1284	885.385
TXNL2	954	2.8758e-08	0.0438069	127	0.19268	1167	0.101559	821	0.14756	1967	0.113687	2164	1332.44
NDUFV1	955	2.87696e-08	0.176486	2006	0.13112	612	0.107131	879	0.0944	1075	0.0614729	1189	2422.85
RPS9	956	2.88023e-08	0.473635	3374	0.11468	467	0.0945023	744	0.06906	561	0.0406295	612	5814.12
HSPC023	957	2.89072e-08	0.27264	2815	0.11874	496	0.0929577	719	0.08006	781	0.0599977	1159	1437.46
NSFL1C	958	2.89857e-08	0.0502859	206	0.21578	1361	0.167361	1513	0.1217	1558	0.0655839	1276	1249.46
NDST1	959	2.91699e-08	0.112417	1160	0.20392	1263	0.131124	1157	0.07362	640	0.0659141	1283	909.712
DKFZP761D0211	960	2.92509e-08	0.113129	1173	0.17316	992	0.212785	1883	0.0567	336	0.0618884	1203	948.154
LRRFIP2	961	2.9276e-08	0.056967	297	0.19226	1163	0.136151	1201	0.11506	1465	0.0853236	1724	648.481
RBX1	962	2.92939e-08	0.117264	1243	0.17168	980	0.108298	896	0.11354	1439	0.0591749	1141	998.231
ARFRP1	963	2.93112e-08	0.0896736	794	0.10288	369	0.13371	1178	0.09674	1116	0.122824	2278	945.981
LAPTM4A	964	2.9837e-08	0.359513	3139	0.1145	463	0.0647599	383	0.0787	749	0.0711165	1404	2721.19
FLJ11259	965	2.98379e-08	0.0667459	434	0.16818	943	0.0940864	737	0.16254	2190	0.0869156	1759	982.558
RAB22A	966	2.98726e-08	0.0459332	143	0.38184	2378	0.227978	1989	0.09834	1157	0.037989	556	715.327
ADCY2	967	2.98733e-08	0.311486	2984	0.0965	318	0.0750687	508	0.0895	975	0.0739694	1471	1201.73
FZD8	968	2.99901e-08	0.363859	3148	0.16376	902	0.149619	1328	0.0668	520	0.025182	257	136.981
EPLIN	969	3.00441e-08	0.0837023	706	0.23652	1541	0.150499	1336	0.09694	1122	0.0520154	953	1142.81
RBBP6	970	3.01032e-08	0.179566	2045	0.18656	1115	0.091192	706	0.1056	1285	0.0466622	794	409.5
BCS1L	971	3.02962e-08	0.113695	1181	0.294	1933	0.11486	988	0.10662	1300	0.037009	527	1205.35
ASH1L	972	3.03222e-08	0.061907	373	0.16052	876	0.0967212	767	0.15516	2088	0.101673	2005	940.808
SOCS5	973	3.03594e-08	0.0730831	531	0.18208	1071	0.110656	934	0.12216	1569	0.0843971	1705	578.615
RFX1	974	3.04155e-08	0.513042	3405	0.11608	472	0.0990898	790	0.06036	410	0.0426994	679	41.1538
TGOLN2	975	3.0542e-08	0.136652	1519	0.207	1286	0.0636859	369	0.13424	1774	0.063154	1228	1584.62
RPP14	976	3.06925e-08	0.102955	1005	0.20026	1227	0.170017	1545	0.08304	844	0.052726	975	449.346
FLJ11220	977	3.06948e-08	0.0318187	47	0.24376	1597	0.177696	1615	0.14984	2003	0.0743243	1484	701.442
EPM2A	978	3.07432e-08	0.164179	1857	0.18218	1073	0.141729	1255	0.07178	607	0.0505222	918	319.115
API5	979	3.08704e-08	0.0879869	773	0.15314	793	0.0849388	635	0.1262	1638	0.106877	2078	994.596
BC-2	980	3.09844e-08	0.221146	2459	0.17342	996	0.125086	1094	0.0793	769	0.0407286	618	723.115
PPIA	981	3.10999e-08	0.139827	1567	0.19618	1193	0.0955624	757	0.086	913	0.068983	1357	13423.2
BVES	982	3.11244e-08	0.0480705	171	0.22876	1470	0.268185	2220	0.10484	1275	0.050338	908	715.615
GRINL1A	983	3.11309e-08	0.0748676	557	0.21106	1331	0.202403	1811	0.07846	745	0.0620357	1206	666.846
P14	984	3.11807e-08	0.23669	2584	0.13082	608	0.0648981	386	0.10116	1202	0.0767019	1530	803.154
PEX6	985	3.12735e-08	0.0847294	712	0.2049	1270	0.103885	839	0.1724	2314	0.0502949	907	384.135
RPL36AL	986	3.14256e-08	0.0879004	771	0.20008	1224	0.116534	1008	0.10146	1209	0.075571	1508	993.269
NFE2L1	987	3.14332e-08	0.0672676	443	0.1969	1206	0.116641	1009	0.11478	1462	0.0886407	1795	3101.02
LSM3	988	3.14992e-08	0.127119	1400	0.13912	692	0.10883	902	0.0948	1079	0.0863298	1748	943.885
PNKP	989	3.15349e-08	0.145708	1636	0.23082	1495	0.24812	2106	0.10682	1306	0.0176903	115	458.135
GAPD	990	3.1581e-08	0.20954	2353	0.13958	698	0.133741	1180	0.05876	380	0.0687074	1353	30857.2
PPM1D	991	3.18416e-08	0.0983299	935	0.13302	638	0.11113	945	0.10702	1316	0.102355	2014	324.481
FLJ12895	992	3.19068e-08	0.155041	1756	0.11456	464	0.0848916	633	0.11446	1458	0.0924486	1861	2119.65
EPOR	993	3.20209e-08	0.0922334	833	0.20204	1245	0.215342	1899	0.07642	691	0.0522141	959	5892.83
DHFR	994	3.22593e-08	0.0559253	285	0.2527	1659	0.136777	1209	0.10142	1205	0.0822846	1654	381.615
RPS24	995	3.24355e-08	0.170797	1938	0.15106	774	0.0927657	716	0.1003	1187	0.0675643	1326	8423.5
POLR3K	996	3.24531e-08	0.104016	1025	0.16436	907	0.145713	1299	0.10278	1233	0.0633827	1231	521.885
LARP	997	3.29037e-08	0.0682979	458	0.25028	1640	0.191154	1722	0.09538	1091	0.0527941	978	2060.27
BCL2L13	998	3.30745e-08	0.0789356	619	0.21958	1393	0.113623	976	0.12588	1629	0.0667144	1304	379.269
PPIL5	999	3.31709e-08	0.375197	3182	0.09892	334	0.0678091	429	0.09344	1057	0.0705356	1390	476.558
FLJ10460	1000	3.32683e-08	0.132433	1460	0.1887	1137	0.14286	1268	0.08568	906	0.054386	1023	1893.63
CDC23	1001	3.34206e-08	0.0695906	484	0.29068	1910	0.115923	1005	0.1139	1447	0.0625705	1216	295.058
RPL17	1002	3.34264e-08	0.172733	1966	0.15714	843	0.181197	1642	0.07668	697	0.0443209	726	4618.58
SAS	1003	3.35538e-08	0.0637768	387	0.1368	665	0.135464	1196	0.10752	1323	0.132037	2393	1139.29
PA2G4	1004	3.36108e-08	0.0449004	136	0.20438	1266	0.11188	953	0.142	1895	0.115283	2184	961.5
KLIP1	1005	3.36499e-08	0.703197	3507	0.11176	444	0.188413	1702	0.03566	98	0.0318672	411	921.288
USP32	1006	3.36961e-08	0.202948	2292	0.14458	729	0.190699	1718	0.0597	397	0.0504405	911	530.962
MRPL35	1007	3.38738e-08	0.137886	1538	0.16772	940	0.0784616	554	0.12288	1575	0.0759688	1516	80.1923
HRI	1008	3.39755e-08	0.0767073	578	0.31542	2058	0.376499	2633	0.0679	537	0.0274676	299	1368.79
NCALD	1009	3.45577e-08	0.342872	3090	0.20366	1258	0.170722	1554	0.0707	593	0.0205028	160	1450.17
ITGB4BP	1010	3.46158e-08	0.317952	3021	0.15904	858	0.0882277	678	0.07612	685	0.0509704	928	1216.37
DCTN4	1011	3.46825e-08	0.0634869	382	0.22136	1406	0.11064	933	0.11506	1464	0.0969409	1937	408.827
FLJ11336	1012	3.46861e-08	0.164459	1859	0.18278	1082	0.289168	2328	0.0438	170	0.0455574	765	233.692
DLST	1013	3.47047e-08	0.135318	1496	0.18788	1128	0.228486	1992	0.08996	982	0.0332092	444	575
NPEPPS	1014	3.49125e-08	0.0427699	115	0.24358	1595	0.148472	1323	0.1424	1900	0.0792613	1579	953.615
NXF1	1015	3.50608e-08	0.0808303	659	0.15788	851	0.0781702	551	0.15418	2075	0.11399	2168	1013.75
MGC17337	1016	3.50667e-08	0.257376	2722	0.16518	912	0.110091	922	0.0865	923	0.0433128	696	41.5385
HSPC039	1017	3.52809e-08	0.0657069	415	0.23958	1569	0.114694	987	0.10672	1303	0.0915602	1844	531.212
HTCD37	1018	3.53011e-08	0.0525779	242	0.16718	932	0.192169	1727	0.09626	1104	0.108564	2102	757.481
FLJ30656	1019	3.5342e-08	0.0235885	8	0.23252	1515	0.129155	1138	0.14156	1887	0.176236	2768	951.808
TCTE3	1020	3.54755e-08	0.588464	3459	0.1015	355	0.0585544	321	0.08462	876	0.0599412	1157	134.558
HSPC009	1021	3.57563e-08	0.307555	2968	0.18806	1132	0.133266	1175	0.07874	752	0.0294599	351	2257.17
DNAJC7	1022	3.57582e-08	0.12543	1371	0.13002	605	0.0886339	683	0.10408	1265	0.118854	2236	737.058
EIF3S7	1023	3.58042e-08	0.173822	1979	0.18054	1051	0.21012	1865	0.05752	345	0.0472046	816	1047.21
FLJ33167	1024	3.58152e-08	0.0635985	384	0.36304	2282	0.386531	2662	0.06588	508	0.030461	372	535.942
COX7A2L	1025	3.59117e-08	0.0760821	573	0.16654	925	0.214385	1893	0.06986	574	0.0946295	1892	1964.69
DRG1	1026	3.5933e-08	0.461731	3352	0.1328	635	0.106052	870	0.04924	241	0.0561155	1068	2200.92
SNRK	1027	3.63649e-08	0.128425	1418	0.16234	889	0.08458	626	0.12446	1607	0.0828562	1668	828.788
RAD1	1028	3.64522e-08	0.084749	713	0.17866	1038	0.181656	1651	0.09208	1026	0.0719716	1428	533.192
TBCA	1029	3.64976e-08	0.141023	1581	0.36772	2316	0.545182	2981	0.03986	136	0.0161955	91	1633.85
RPS3A	1030	3.66754e-08	0.126075	1386	0.16644	923	0.168819	1531	0.07886	755	0.0656486	1277	14281.5
BZW2	1031	3.66954e-08	0.202764	2289	0.19712	1207	0.115444	998	0.11552	1472	0.0344252	467	794.077
DKFZP434K1421	1032	3.67194e-08	0.119027	1278	0.13532	652	0.108244	895	0.1091	1349	0.0965336	1931	223.615
UBE2R2	1033	3.67533e-08	0.251655	2690	0.18408	1092	0.160359	1432	0.05944	392	0.0416223	648	1844.54
DAP3	1034	3.67785e-08	0.418304	3279	0.19054	1155	0.1813	1644	0.05574	320	0.0228333	208	120.288
PAM	1035	3.70423e-08	0.19354	2205	0.12756	577	0.145276	1292	0.06934	567	0.074482	1487	1043.96
SPRED1	1036	3.70897e-08	0.210165	2363	0.18634	1114	0.111659	950	0.10988	1372	0.0386001	570	235.923
FLJ10546	1037	3.72022e-08	0.197664	2248	0.11722	482	0.0717913	461	0.13406	1771	0.0834224	1685	235.558
NCOA6IP	1038	3.73177e-08	0.0496777	196	0.22772	1454	0.13752	1220	0.1321	1734	0.0908026	1830	434.385
CGI-27	1039	3.73913e-08	0.344349	3096	0.13252	633	0.0483638	227	0.09988	1181	0.0848216	1716	580.769
MRPS27	1040	3.74104e-08	0.138408	1551	0.19714	1208	0.1362	1202	0.08426	868	0.0597413	1152	569.942
AKAP13	1041	3.74981e-08	0.0491901	186	0.2468	1615	0.153945	1381	0.1432	1915	0.0700636	1379	740.885
HKR1	1042	3.78118e-08	0.148082	1664	0.1586	856	0.128886	1131	0.09688	1120	0.0644757	1257	477.596
ANGPTL2	1043	3.79632e-08	0.131919	1457	0.15308	791	0.110342	926	0.10348	1251	0.0823294	1657	1146.65
POP4	1044	3.80014e-08	0.0738445	544	0.22478	1430	0.167386	1514	0.09182	1021	0.0744876	1488	742.019
ASB8	1045	3.81146e-08	0.130584	1441	0.17564	1014	0.0904764	699	0.12154	1555	0.0755681	1506	295.904
ATP5B	1046	3.82592e-08	0.228931	2523	0.10778	410	0.0957013	759	0.08848	952	0.0915684	1845	9265.42
KIAA1117	1047	3.83425e-08	0.192818	2194	0.12904	593	0.0751144	509	0.13346	1761	0.0768687	1535	375.558
DBP	1048	3.83826e-08	0.16652	1886	0.2392	1564	0.0302467	88	0.19432	2554	0.0819832	1647	474.135
CDK10	1049	3.85794e-08	0.261323	2750	0.16942	959	0.102703	829	0.0872	930	0.0486553	855	392.885
GOLGA4	1050	3.8633e-08	0.176306	2000	0.20932	1310	0.0846515	627	0.08732	933	0.0708185	1396	440.808
STX3A	1051	3.86741e-08	0.0855211	727	0.25226	1655	0.259836	2166	0.08592	909	0.0401532	600	616.019
RPS21	1052	3.88722e-08	0.217259	2425	0.22592	1441	0.127831	1123	0.09248	1037	0.0334995	445	6448.98
MAT2B	1053	3.91241e-08	0.0511164	220	0.18094	1056	0.200833	1800	0.09284	1046	0.113447	2160	1682.52
UST	1054	3.95212e-08	0.100834	970	0.25898	1709	0.15346	1374	0.10698	1313	0.046097	780	513.442
PPFIA1	1055	3.95373e-08	0.099232	948	0.26926	1770	0.198242	1782	0.10174	1213	0.036687	522	424.115
CLNS1A	1056	3.97178e-08	0.12547	1372	0.15384	801	0.103049	831	0.10684	1308	0.0934573	1878	585.596
POLK	1057	3.97505e-08	0.26135	2751	0.1479	745	0.0773595	539	0.11056	1385	0.0601251	1161	151.596
OCIA	1058	3.97511e-08	0.176615	2008	0.12742	574	0.108878	905	0.10428	1270	0.0777967	1551	2367.31
CHFR	1059	3.99621e-08	0.0297472	33	0.2499	1637	0.30311	2382	0.10236	1225	0.0866405	1753	843.154
LOC128977	1060	4.00314e-08	0.134058	1477	0.19406	1176	0.0675908	425	0.12998	1699	0.0875837	1772	248.019
PEF	1061	4.0093e-08	0.131169	1448	0.18592	1107	0.0993554	794	0.10928	1352	0.0757172	1510	868.462
DVL3	1062	4.02522e-08	0.0682545	456	0.25982	1718	0.213656	1888	0.09362	1060	0.0567436	1080	724.75
PTD008	1063	4.02745e-08	0.20788	2338	0.17334	995	0.141891	1256	0.0801	785	0.049175	878	1263.4
REV1L	1064	4.02909e-08	0.0930491	841	0.26186	1730	0.14966	1329	0.1172	1502	0.0471419	815	410.038
SLC12A5	1065	4.05144e-08	0.389009	3216	0.10734	406	0.0851351	638	0.0805	797	0.0707944	1395	1960.92
GALNT1	1066	4.07257e-08	0.0298914	34	0.24476	1604	0.200338	1798	0.16442	2209	0.0845045	1707	1003.23
LSM6	1067	4.07405e-08	0.0848181	714	0.16928	955	0.137777	1222	0.12562	1625	0.0819806	1646	563.692
MNT	1068	4.08173e-08	0.204727	2307	0.18098	1057	0.0836805	610	0.12488	1614	0.0527153	974	564.712
GALK2	1069	4.08247e-08	0.165709	1876	0.23144	1503	0.0778663	546	0.12764	1660	0.0535571	993	197.481
NEDD8	1070	4.11984e-08	0.165757	1877	0.16372	901	0.170392	1548	0.0824	836	0.0540686	1012	1299.63
TAF7	1071	4.13107e-08	0.162737	1843	0.16902	951	0.11453	984	0.10952	1361	0.0598742	1155	703.212
LOXL4	1072	4.14218e-08	0.110945	1140	0.25976	1717	0.337143	2507	0.05964	395	0.0357449	501	53.8269
UBXD1	1073	4.15407e-08	0.0984614	938	0.18152	1062	0.110604	932	0.14352	1917	0.0732174	1456	713.269
MGC29784	1074	4.17169e-08	0.21837	2439	0.2891	1898	0.234106	2024	0.05862	377	0.0240785	225	561.692
UROS	1075	4.18096e-08	0.164873	1865	0.17206	984	0.0788632	559	0.13144	1721	0.0710983	1403	1093.5
CROT	1076	4.22082e-08	0.106219	1056	0.11418	461	0.158276	1423	0.08374	859	0.131302	2381	481.442
B4GALT6	1077	4.2329e-08	0.185013	2109	0.21028	1324	0.0955877	758	0.12414	1602	0.0458501	773	262.5
TSTA3	1078	4.26176e-08	0.221086	2457	0.19298	1172	0.287917	2318	0.05506	313	0.0315085	403	689.788
CUGBP2	1079	4.26594e-08	0.345177	3100	0.1733	994	0.117104	1013	0.08328	848	0.036566	519	2253.94
PRKWNK1	1080	4.28382e-08	0.121929	1315	0.25728	1696	0.0805089	577	0.12734	1656	0.0666076	1302	1885.92
CRKL	1081	4.29684e-08	0.104015	1024	0.2091	1307	0.118108	1024	0.11732	1504	0.0712959	1411	808.712
GEMIN7	1082	4.30238e-08	0.228953	2524	0.15532	819	0.210242	1866	0.05906	387	0.0487234	859	278.115
NDUFA6	1083	4.31029e-08	0.256557	2712	0.18884	1140	0.212133	1877	0.05582	322	0.0375704	546	1277.75
MGC12981	1084	4.31075e-08	0.0504545	210	0.37712	2357	0.273803	2254	0.1085	1337	0.0381348	558	1816.15
HIRIP5	1085	4.31416e-08	0.056239	289	0.2914	1914	0.175391	1590	0.11868	1515	0.063241	1229	364.135
MDM1	1086	4.34975e-08	0.136912	1522	0.28642	1883	0.122703	1067	0.10904	1347	0.0414565	643	264.154
PPAT	1087	4.36618e-08	0.0655307	412	0.33174	2138	0.232843	2020	0.08854	954	0.048716	857	441.423
CDV-1	1088	4.37369e-08	0.0656052	414	0.2184	1385	0.229098	1998	0.10814	1333	0.0616121	1194	492.519
RNF34	1089	4.38057e-08	0.0729787	530	0.18848	1135	0.131249	1159	0.10372	1259	0.116984	2211	1250.37
PIN4	1090	4.3841e-08	0.061177	364	0.23056	1489	0.122354	1065	0.10106	1198	0.125698	2316	899.923
PBP	1091	4.38589e-08	0.200074	2267	0.18526	1100	0.115378	996	0.0866	924	0.0592188	1142	9269.13
PSMD10	1092	4.41892e-08	0.11287	1168	0.25602	1686	0.143557	1280	0.07586	680	0.0702171	1382	752.904
NIT1	1093	4.424e-08	0.0893772	790	0.2561	1688	0.191846	1726	0.08824	950	0.0570921	1089	1607.79
RNF139	1094	4.43232e-08	0.265955	2777	0.16924	953	0.127381	1118	0.08304	843	0.0465526	792	560.077
LOC57149	1095	4.43594e-08	0.10847	1096	0.15566	826	0.15459	1388	0.09924	1174	0.085634	1735	604.154
DD5	1096	4.455e-08	0.125967	1385	0.15724	847	0.103938	841	0.11356	1440	0.0952895	1905	1301.17
FLJ38991	1097	4.48089e-08	0.2386	2602	0.21596	1362	0.170583	1551	0.06822	541	0.0373669	537	140.615
GAS41	1098	4.53919e-08	0.226703	2503	0.18116	1060	0.208256	1855	0.07064	591	0.0375685	545	100.173
CCR1	1099	4.54537e-08	0.101197	979	0.21732	1371	0.0755323	514	0.16036	2168	0.0853274	1725	434.462
RPS6	1100	4.55735e-08	0.12755	1408	0.24708	1617	0.127108	1113	0.08498	884	0.0669452	1308	9930.38
RNF138	1101	4.57245e-08	0.334446	3072	0.13912	693	0.104895	856	0.08752	939	0.053529	990	380.115
TAF11	1102	4.57667e-08	0.183652	2094	0.19682	1205	0.100186	807	0.11064	1387	0.0571191	1091	307.269
RRAGC	1103	4.57846e-08	0.0439999	128	0.26372	1745	0.387923	2668	0.08076	804	0.0629793	1225	1268.29
GLTP	1104	4.596e-08	0.155944	1768	0.24696	1616	0.216338	1906	0.06834	546	0.0403638	605	298.788
ARPC4	1105	4.60569e-08	0.410531	3263	0.0957	313	0.0905913	701	0.08738	936	0.0740548	1474	936.769
SNX12	1106	4.61013e-08	0.157766	1794	0.23532	1533	0.26663	2213	0.0574	343	0.0405728	610	403.635
LY86	1107	4.61899e-08	0.179703	2049	0.20946	1313	0.0431574	185	0.19738	2584	0.0720357	1431	563.423
RANBP9	1108	4.62067e-08	0.256608	2714	0.16278	893	0.074343	499	0.10978	1370	0.0677776	1333	1282.94
NCOA6	1109	4.62307e-08	0.139711	1565	0.10934	427	0.126232	1104	0.09236	1033	0.129803	2374	834.712
LOC162427	1110	4.63018e-08	0.149835	1684	0.195	1188	0.27543	2266	0.06272	440	0.0458721	776	1055.19
NAGLU	1111	4.64307e-08	0.326605	3048	0.1566	835	0.0464783	217	0.1217	1557	0.0802538	1603	349.615
FLJ10803	1112	4.6528e-08	0.0255754	14	0.29302	1925	0.275153	2262	0.15048	2018	0.074982	1499	943.135
ANAPC5	1113	4.65309e-08	0.0975173	921	0.2791	1839	0.165698	1495	0.13666	1807	0.0377535	551	2320.46
RSC1A1	1114	4.65867e-08	0.125925	1384	0.2098	1317	0.143213	1275	0.08598	911	0.0716107	1419	167.519
CHP	1115	4.66554e-08	0.202185	2283	0.29944	1961	0.39804	2696	0.04084	143	0.0237053	221	1236.54
PRKCB1	1116	4.67349e-08	0.391252	3219	0.18542	1101	0.0728142	472	0.12644	1642	0.0349899	480	2540.12
RBM7	1117	4.68277e-08	0.071424	508	0.18568	1104	0.118938	1037	0.14892	1986	0.0996864	1973	373.327
POLR2B	1118	4.69094e-08	0.123283	1337	0.15568	827	0.170625	1553	0.10596	1293	0.0676014	1327	1137.63
H41	1119	4.69253e-08	0.11688	1233	0.2095	1314	0.145437	1296	0.09946	1178	0.066248	1295	720.173
ING1L	1120	4.69391e-08	0.0876725	768	0.17576	1016	0.107244	881	0.12498	1618	0.113646	2161	387.308
STIP1	1121	4.69691e-08	0.101793	992	0.16572	916	0.0840884	614	0.16384	2207	0.10106	1995	465.135
RPL35A	1122	4.70203e-08	0.0780146	604	0.38056	2370	0.131487	1161	0.10296	1237	0.0584993	1126	3912.98
LOC129285	1123	4.72175e-08	0.054542	259	0.2575	1697	0.112205	958	0.18262	2427	0.082045	1650	622.25
SLC35E1	1124	4.74592e-08	0.0858032	733	0.16932	956	0.0893444	688	0.16122	2176	0.113406	2159	2197.54
WAC	1125	4.74637e-08	0.103861	1020	0.22848	1465	0.140414	1245	0.12208	1568	0.0583475	1122	1604.87
AP2A2	1126	4.75287e-08	0.0749794	559	0.27194	1786	0.133388	1177	0.11238	1419	0.0777588	1550	1671.48
GMPR2	1127	4.78485e-08	0.192161	2180	0.1595	865	0.101811	822	0.09936	1177	0.0771701	1541	625.808
COPB	1128	4.78745e-08	0.0784296	613	0.22582	1438	0.203044	1815	0.0979	1149	0.0679993	1338	1160.73
LZIC	1129	4.79558e-08	0.130448	1438	0.21796	1383	0.171527	1560	0.09016	984	0.0545377	1025	328.769
EIF2S2	1130	4.80397e-08	0.0958366	893	0.13386	646	0.0974748	775	0.15192	2046	0.126452	2325	1270.75
MCCC1	1131	4.81606e-08	0.121224	1303	0.1697	960	0.111636	949	0.1058	1290	0.0991168	1964	453.519
CAST	1132	4.86875e-08	0.152068	1711	0.22258	1413	0.10639	874	0.11274	1426	0.0599697	1158	756.962
SNX16	1133	4.87256e-08	0.239514	2608	0.20098	1233	0.0698703	451	0.12186	1563	0.0594478	1146	73.8462
GYG2	1134	4.877e-08	0.106795	1068	0.20188	1243	0.0872214	669	0.1632	2201	0.0794662	1592	378.75
RAB6C	1135	4.89673e-08	0.317325	3018	0.12876	590	0.0664625	410	0.10908	1348	0.0826635	1666	1396.69
PPP3CC	1136	4.89903e-08	0.0749788	558	0.1486	753	0.169573	1541	0.11242	1422	0.115337	2186	605.558
LOC91801	1137	4.90709e-08	0.0946987	871	0.21088	1330	0.155298	1397	0.08898	964	0.0889202	1803	410.923
SNRPD2	1138	4.95121e-08	0.126994	1398	0.16258	890	0.155198	1395	0.08908	968	0.0867383	1756	2383.44
RPL18	1139	4.95568e-08	0.42682	3293	0.15446	810	0.200204	1794	0.06014	404	0.0312191	392	5841.04
LOC56851	1140	4.95651e-08	0.0990516	947	0.2258	1437	0.195492	1755	0.0966	1112	0.0586813	1131	1079.56
FLOT2	1141	4.95793e-08	0.149392	1679	0.15324	795	0.142586	1263	0.10316	1245	0.0736255	1463	1527.37
DDX24	1142	4.98178e-08	0.13906	1557	0.16064	878	0.108864	904	0.10564	1286	0.0969685	1938	2609.25
TIMM10	1143	4.98623e-08	0.110241	1129	0.23282	1517	0.219701	1929	0.0816	821	0.0541878	1019	958.5
ACTG1	1144	5.00501e-08	0.120972	1298	0.10732	405	0.115944	1007	0.1196	1523	0.139019	2470	14715.8
CRSP3	1145	5.01611e-08	0.152108	1713	0.188	1131	0.195081	1753	0.09892	1166	0.0454541	762	213.654
EPRS	1146	5.02539e-08	0.063375	380	0.24182	1582	0.165846	1497	0.14264	1909	0.0693155	1362	867.673
TTC8	1147	5.03987e-08	0.0548487	262	0.25892	1707	0.212549	1882	0.1234	1590	0.0676593	1329	735.981
THAP5	1148	5.06346e-08	0.435479	3311	0.14352	726	0.0567611	303	0.11524	1467	0.0619339	1204	150.462
HDAC8	1149	5.08877e-08	0.202236	2284	0.1679	942	0.273059	2249	0.06412	472	0.0428026	684	180.673
NEUGRIN	1150	5.09408e-08	0.291814	2911	0.18794	1130	0.0732408	478	0.0942	1071	0.0673213	1318	4072.63
DYRK1A	1151	5.0958e-08	0.124665	1357	0.15164	780	0.0968626	769	0.12938	1688	0.107559	2089	1169.23
MRPL49	1152	5.13485e-08	0.13809	1544	0.25236	1657	0.340042	2516	0.06916	564	0.0313309	396	1366.58
MTHFS	1153	5.15949e-08	0.364035	3149	0.11686	478	0.0958372	762	0.09082	991	0.0696782	1370	621.442
AP2S1	1154	5.18787e-08	0.21388	2397	0.18974	1147	0.151895	1357	0.08306	845	0.0506687	923	2678.37
CREBBP	1155	5.19567e-08	0.0968242	909	0.20846	1299	0.119682	1043	0.12512	1620	0.0859594	1740	657.673
SOCS4	1156	5.19847e-08	0.0271579	18	0.19438	1181	0.207306	1841	0.1294	1689	0.183568	2811	1199.83
LPP	1157	5.21796e-08	0.124969	1362	0.17172	982	0.128386	1126	0.12602	1635	0.0751512	1503	974.365
PSMD12	1158	5.2183e-08	0.0757287	568	0.4686	2675	0.179708	1626	0.09724	1131	0.0420795	661	910.596
ARNT	1159	5.26234e-08	0.114442	1191	0.23692	1546	0.180979	1640	0.08638	922	0.0620823	1208	157.385
NDUFB9	1160	5.27604e-08	0.176326	2001	0.14694	735	0.198258	1783	0.07404	648	0.0693701	1364	5261.15
MDS009	1161	5.28435e-08	0.305779	2960	0.15102	773	0.0774468	540	0.10458	1274	0.0706501	1392	70.3654
MGC15482	1162	5.29196e-08	0.241347	2627	0.1084	418	0.1266	1109	0.09316	1053	0.0857626	1736	240.385
FKBP3	1163	5.2923e-08	0.142213	1594	0.1996	1223	0.188007	1699	0.11018	1377	0.0450073	749	799.923
MTX2	1164	5.30233e-08	0.217453	2426	0.15156	779	0.152206	1363	0.07558	675	0.0699348	1377	713.058
ATIC	1165	5.3067e-08	0.0392089	87	0.35112	2224	0.378946	2642	0.1039	1262	0.0489561	864	952.596
ACAD9	1166	5.30828e-08	0.0641704	391	0.31102	2035	0.527329	2953	0.08152	819	0.0309385	387	1477.44
MGC14288	1167	5.31507e-08	0.314731	3002	0.15216	785	0.0844618	622	0.10844	1336	0.0605946	1170	633.962
PEA15	1168	5.32315e-08	0.211944	2385	0.20962	1316	0.0871026	666	0.10108	1199	0.068051	1339	6749.83
AKAP11	1169	5.32877e-08	0.252917	2697	0.13334	640	0.0758981	520	0.1066	1299	0.0976596	1946	2187.13
PGLS	1170	5.36628e-08	0.273346	2822	0.20008	1225	0.0323864	101	0.1232	1584	0.12297	2279	568.654
GNB1	1171	5.36936e-08	0.22597	2496	0.18352	1088	0.117165	1015	0.09702	1127	0.0569565	1085	3983.79
CYYR1	1172	5.37384e-08	0.0361589	65	0.2753	1807	0.264195	2201	0.11018	1378	0.0927366	1866	456.5
PTPRM	1173	5.38385e-08	0.170639	1937	0.44238	2596	0.249604	2112	0.0593	391	0.024095	226	643.615
AP2A1	1174	5.39354e-08	0.0745829	553	0.2126	1339	0.0887518	685	0.19208	2538	0.0997763	1975	714.731
AVIL	1175	5.39444e-08	0.153204	1730	0.13856	682	0.088825	686	0.14824	1978	0.096506	1930	282.808
EED	1176	5.40156e-08	0.164001	1854	0.15046	768	0.0698127	449	0.1507	2025	0.104044	2031	164.519
INPP4A	1177	5.40853e-08	0.189501	2156	0.22202	1411	0.0802633	573	0.13292	1749	0.0602538	1164	440.577
KIF2	1178	5.41207e-08	0.16709	1898	0.25114	1645	0.153103	1372	0.1287	1677	0.0327302	432	657.673
MRPS10	1179	5.422e-08	0.0446448	134	0.27514	1805	0.177744	1616	0.14974	2002	0.0829314	1674	507.558
PTD004	1180	5.42734e-08	0.155137	1760	0.17798	1030	0.107023	878	0.1035	1252	0.088736	1797	1551.23
LOC129401	1181	5.43898e-08	0.106747	1065	0.22812	1458	0.112571	961	0.12336	1589	0.0804296	1606	432.654
NDUFB1	1182	5.47793e-08	0.269615	2797	0.15464	812	0.117443	1016	0.07506	663	0.0745296	1490	2631.92
PABPC1	1183	5.47864e-08	0.42421	3287	0.14058	707	0.0470234	222	0.11584	1479	0.0843356	1703	4636.67
UBE2A	1184	5.48854e-08	0.0802072	647	0.22598	1442	0.161618	1452	0.11444	1457	0.0818695	1642	882.981
FLJ14011	1185	5.49273e-08	0.332192	3068	0.28546	1877	0.199175	1789	0.06412	471	0.0226799	205	106.538
RTN3	1186	5.50388e-08	0.324139	3042	0.1358	655	0.0781919	552	0.09816	1151	0.0814624	1634	5426.6
USP25	1187	5.50417e-08	0.093366	847	0.22564	1435	0.250398	2114	0.11548	1471	0.0451819	753	984.192
CHST2	1188	5.51084e-08	0.154658	1750	0.2187	1387	0.196042	1762	0.08008	783	0.0518968	948	646.365
PXK	1189	5.52341e-08	0.0973084	917	0.20294	1254	0.10747	885	0.14618	1954	0.0890286	1805	1210.37
RASSF3	1190	5.52884e-08	0.0765467	577	0.1783	1035	0.18067	1635	0.10934	1354	0.102543	2017	418.288
BCAR3	1191	5.53302e-08	0.259389	2739	0.12384	540	0.0842097	617	0.12382	1595	0.0826061	1664	114.731
FLJ11730	1192	5.5414e-08	0.0982287	934	0.5387	2844	0.711864	3191	0.05278	286	0.0139374	61	936.423
RXRA	1193	5.55382e-08	0.405293	3251	0.17094	974	0.161299	1445	0.0855	905	0.0290668	339	1199.98
RPS16	1194	5.55566e-08	0.409992	3261	0.1455	731	0.075786	519	0.09666	1113	0.0635736	1235	9727.08
NGLY1	1195	5.5604e-08	0.27092	2804	0.17434	1001	0.128112	1124	0.07398	643	0.0621125	1209	803.538
VDAC3	1196	5.57027e-08	0.178659	2035	0.1677	939	0.108712	901	0.10522	1279	0.0812754	1628	2961.02
FZD6	1197	5.58226e-08	0.0965784	906	0.20018	1226	0.112179	957	0.1493	1994	0.086209	1744	219.462
RPL36	1198	5.59327e-08	0.234042	2559	0.15146	778	0.0665894	414	0.12336	1588	0.0960526	1920	3175.58
RBBP7	1199	5.60045e-08	0.237641	2593	0.21632	1367	0.285998	2310	0.05774	350	0.0329898	440	1662.92
CTNNAL1	1200	5.605e-08	0.369255	3165	0.1668	927	0.0405976	162	0.12794	1664	0.0876117	1774	686.115
SLC1A4	1201	5.63484e-08	0.0695314	482	0.23948	1568	0.109578	916	0.1604	2169	0.0962761	1924	885.615
INHBC	1202	5.67815e-08	0.0683534	460	0.18692	1117	0.146489	1306	0.13434	1776	0.112927	2154	636.827
GLRX2	1203	5.68922e-08	0.279268	2846	0.17542	1010	0.0668793	418	0.12872	1678	0.0674576	1323	660.827
RRM1	1204	5.70098e-08	0.0573348	307	0.19672	1203	0.129162	1139	0.18448	2443	0.106076	2060	521.192
RAE1	1205	5.70175e-08	0.334278	3071	0.15216	786	0.148887	1324	0.07896	758	0.0476815	834	1597.83
TRIM44	1206	5.71684e-08	0.168349	1910	0.17816	1034	0.124831	1089	0.09422	1072	0.0810373	1618	1298.67
BIRC6	1207	5.7343e-08	0.0418643	101	0.19412	1177	0.165432	1491	0.13388	1769	0.159311	2648	539.327
FLJ21347	1208	5.7677e-08	0.195278	2224	0.16778	941	0.117152	1014	0.1273	1654	0.0590264	1137	2003.31
ZNF291	1209	5.7711e-08	0.0385258	81	0.38606	2389	0.362905	2594	0.10768	1329	0.0496523	898	764.923
SLC35B1	1210	5.77774e-08	0.17701	2011	0.11704	479	0.100866	814	0.12148	1553	0.113813	2166	642.096
LOC54499	1211	5.78248e-08	0.0774713	594	0.23212	1510	0.203861	1820	0.11894	1520	0.0663153	1298	796.442
SPC18	1212	5.79338e-08	0.1057	1047	0.2023	1248	0.143617	1282	0.11434	1453	0.0825031	1658	1017.29
MGC35274	1213	5.80852e-08	0.212603	2387	0.27538	1809	0.26316	2194	0.06454	481	0.0292099	343	1282.69
FLJ10979	1214	5.81056e-08	0.130375	1436	0.23134	1501	0.352796	2561	0.06768	535	0.0403463	604	329.231
SFRS2IP	1215	5.82953e-08	0.0767883	580	0.22134	1405	0.100633	813	0.1781	2377	0.095695	1913	720.481
MRPS36	1216	5.85339e-08	0.0511448	221	0.27682	1819	0.292697	2342	0.1157	1476	0.0610482	1177	707.865
PFKM	1217	5.85401e-08	0.197695	2249	0.14822	748	0.112312	960	0.09624	1103	0.0924244	1860	3520.58
SFRS1	1218	5.86364e-08	0.0516399	233	0.2016	1238	0.152815	1368	0.16578	2224	0.111175	2137	947.269
MGC11308	1219	5.88731e-08	0.133522	1470	0.25724	1695	0.0840885	615	0.1326	1741	0.0768707	1536	576.923
MPZL1	1220	5.94146e-08	0.0960901	898	0.21452	1353	0.107925	891	0.14894	1987	0.0896666	1815	1070.12
SDCCAG10	1221	5.94983e-08	0.112624	1165	0.14958	762	0.0848597	631	0.14494	1939	0.143591	2516	620.288
FLJ11021	1222	5.9509e-08	0.090596	809	0.1433	724	0.117708	1021	0.14266	1910	0.136501	2437	1074.75
KIFAP3	1223	5.95927e-08	0.271332	2806	0.1671	928	0.0869531	663	0.12292	1576	0.0614927	1192	1044.83
MRPL15	1224	5.99691e-08	0.0672292	441	0.25344	1664	0.119838	1045	0.19572	2564	0.0750377	1502	754.654
NLK	1225	6.03779e-08	0.188225	2146	0.30584	2000	0.176812	1606	0.1316	1724	0.0225401	199	383.019
ADAR	1226	6.05609e-08	0.114397	1190	0.29452	1938	0.501701	2909	0.04676	208	0.0383141	563	1740.5
DCBLD1	1227	6.05963e-08	0.0876262	765	0.33882	2168	0.367967	2608	0.13792	1829	0.0201105	155	285.115
NCE2	1228	6.06586e-08	0.10639	1059	0.19412	1178	0.130981	1156	0.11828	1511	0.0948019	1895	300.635
WBP4	1229	6.07549e-08	0.122821	1329	0.25674	1693	0.142677	1264	0.14246	1903	0.0474003	823	561.288
TMEM4	1230	6.07628e-08	0.136029	1509	0.18198	1068	0.115376	995	0.1341	1772	0.0793329	1586	796.173
HSD17B4	1231	6.0953e-08	0.206754	2325	0.14972	763	0.102457	826	0.1243	1603	0.0773151	1544	888.5
CBL	1232	6.09988e-08	0.21817	2435	0.17068	970	0.0998976	803	0.12712	1650	0.0645046	1258	264.923
EIF4EL3	1233	6.11778e-08	0.0986315	941	0.20936	1312	0.148251	1320	0.13802	1831	0.0724036	1440	504.942
RPA3	1234	6.12767e-08	0.358953	3136	0.1358	656	0.0942658	740	0.09194	1022	0.0725294	1442	389.788
CGI-127	1235	6.13245e-08	0.135529	1500	0.19484	1184	0.226279	1979	0.08356	853	0.061418	1187	1386.4
BACH1	1236	6.14775e-08	0.195953	2230	0.13854	680	0.109117	911	0.119	1521	0.0872099	1765	255.788
BICD2	1237	6.15318e-08	0.226707	2504	0.23486	1529	0.105407	863	0.1119	1411	0.048994	865	326.192
KARS	1238	6.15452e-08	0.304845	2956	0.16068	880	0.137831	1223	0.07168	603	0.0635951	1237	1826.83
HABP4	1239	6.16085e-08	0.180819	2064	0.23114	1499	0.286793	2313	0.05812	363	0.0442225	719	435.962
FLJ13639	1240	6.16279e-08	0.208798	2345	0.48026	2710	0.455739	2817	0.03888	129	0.0173439	106	398.673
SOD1	1241	6.18348e-08	0.330881	3064	0.23058	1491	0.217707	1916	0.05488	311	0.033921	456	6744.06
EAF1	1242	6.20861e-08	0.31225	2988	0.15632	829	0.105677	865	0.08382	860	0.0718068	1424	159.423
PSMD4	1243	6.21739e-08	0.148895	1673	0.27796	1830	0.330914	2484	0.07962	775	0.0285119	322	1429.15
RABAC1	1244	6.24328e-08	0.16476	1864	0.23658	1542	0.10421	847	0.11236	1416	0.0684032	1346	2294.38
CXX1	1245	6.27024e-08	0.240827	2616	0.25012	1639	0.344505	2530	0.05914	388	0.0255486	262	4699.5
MIS12	1246	6.29411e-08	0.142563	1600	0.2083	1298	0.0701116	452	0.16264	2193	0.0929472	1868	131.481
BCL10	1247	6.29573e-08	0.20165	2281	0.17092	972	0.12728	1116	0.0913	1008	0.0786029	1567	182.404
PIM1	1248	6.29706e-08	0.0572832	305	0.1714	977	0.16827	1526	0.1401	1860	0.136041	2433	461.231
ATF6	1249	6.31751e-08	0.211653	2383	0.17172	983	0.113723	977	0.09786	1146	0.0781022	1556	235.615
LOC90799	1250	6.33415e-08	0.106474	1060	0.16516	911	0.175414	1591	0.10734	1319	0.0956601	1912	435.115
HDLBP	1251	6.33673e-08	0.258573	2734	0.22934	1475	0.156811	1410	0.09392	1068	0.0362814	513	1019.79
SMARCE1	1252	6.36413e-08	0.100577	965	0.36696	2312	0.242599	2076	0.10362	1256	0.0343008	465	559.346
FLJ37451	1253	6.3768e-08	0.028433	24	0.33344	2144	0.6227	3088	0.07726	711	0.0699109	1376	698.885
MRPS35	1254	6.38939e-08	0.0630589	377	0.32448	2100	0.344935	2534	0.0703	586	0.0643943	1254	1032.81
ENSA	1255	6.39081e-08	0.215299	2407	0.25678	1694	0.145371	1295	0.08104	808	0.0490673	873	1865.85
NLN	1256	6.39127e-08	0.0454979	141	0.23198	1508	0.170922	1556	0.15536	2094	0.114032	2169	392.327
PRKAR2A	1257	6.39412e-08	0.0526297	243	0.39104	2404	0.365785	2601	0.09096	997	0.0466948	796	1966.1
IRF2BP2	1258	6.40355e-08	0.125747	1381	0.24588	1610	0.0843603	620	0.14778	1971	0.0830729	1678	348.192
DKFZP566D1346	1259	6.427e-08	0.173924	1981	0.3469	2208	0.125023	1092	0.09266	1042	0.0459811	779	136.769
UBE2L6	1260	6.43726e-08	0.0460289	144	0.23044	1487	0.159661	1428	0.19054	2520	0.0997572	1974	1317.1
CORO1C	1261	6.44003e-08	0.0462103	147	0.23012	1484	0.126071	1102	0.20732	2669	0.115865	2192	641.019
CALM2	1262	6.47308e-08	0.182158	2078	0.20914	1308	0.0780764	549	0.1417	1891	0.0767984	1533	23485.9
CFL1	1263	6.4785e-08	0.168297	1909	0.1639	903	0.158741	1425	0.09128	1007	0.0810531	1619	22796.2
RAB2	1264	6.48165e-08	0.156659	1776	0.22278	1415	0.105145	860	0.1161	1483	0.0760765	1517	1162.31
TK2	1265	6.48183e-08	0.0524453	240	0.2765	1817	0.181562	1647	0.14082	1876	0.087422	1768	728.269
PITPNB	1266	6.48422e-08	0.0859554	737	0.21926	1392	0.156681	1407	0.12296	1580	0.0893015	1810	1868.83
FUS	1267	6.49385e-08	0.0701879	490	0.25288	1661	0.134444	1185	0.1604	2170	0.0848389	1717	1324.73
DIP13B	1268	6.49527e-08	0.11017	1126	0.19612	1192	0.13502	1192	0.13228	1737	0.0841656	1699	323.385
HBXAP	1269	6.4976e-08	0.282228	2863	0.13882	687	0.0690953	445	0.1365	1804	0.0879297	1779	104.365
IVD	1270	6.50279e-08	0.348882	3107	0.19052	1154	0.152475	1366	0.07532	668	0.042598	675	646.712
CSNK1G3	1271	6.50639e-08	0.0939514	859	0.1535	797	0.110357	927	0.16004	2164	0.127736	2350	275.423
VCP	1272	6.5395e-08	0.0685354	462	0.21082	1329	0.255871	2146	0.09696	1125	0.0912262	1840	1099.38
PDCD7	1273	6.54405e-08	0.309237	2976	0.13758	674	0.0934264	723	0.11256	1423	0.0731411	1453	135.442
FLJ21308	1274	6.56238e-08	0.0514252	228	0.30164	1973	0.4999	2906	0.09526	1090	0.0444241	730	564.077
STRN	1275	6.56526e-08	0.0845365	708	0.2234	1419	0.0853424	642	0.17016	2285	0.119706	2248	330.712
SART3	1276	6.57678e-08	0.0804403	651	0.28268	1861	0.130338	1152	0.15522	2091	0.0714894	1417	472.808
FLJ20604	1277	6.58079e-08	0.0907932	813	0.2311	1498	0.118266	1028	0.14312	1914	0.0926576	1864	526.865
MAFG	1278	6.58355e-08	0.250657	2684	0.23768	1552	0.163011	1463	0.09618	1102	0.0352454	484	392.096
MGC4562	1279	6.60069e-08	0.0489283	181	0.52934	2828	0.328648	2480	0.1188	1517	0.0326409	431	86.8462
PCNX	1280	6.63198e-08	0.0849977	718	0.17676	1024	0.154945	1390	0.13342	1760	0.106774	2076	254.096
EKI1	1281	6.64107e-08	0.184375	2103	0.329	2126	0.31339	2426	0.10834	1335	0.0161243	89	243.596
MITF	1282	6.66122e-08	0.140113	1573	0.16922	952	0.136707	1206	0.12036	1532	0.0853818	1730	415.481
PTPRB	1283	6.6619e-08	0.1037	1016	0.15544	822	0.18051	1634	0.1117	1409	0.102499	2016	223.192
D1S155E	1284	6.69444e-08	0.111531	1146	0.19134	1157	0.0937487	733	0.15886	2144	0.105329	2047	1923.21
LEPROTL1	1285	6.72655e-08	0.0826485	693	0.26838	1767	0.115016	990	0.15348	2066	0.0859035	1739	959.577
NFS1	1286	6.74616e-08	0.049751	198	0.20896	1305	0.119438	1040	0.1831	2434	0.14838	2545	948.115
COQ4	1287	6.76892e-08	0.604692	3467	0.20656	1282	0.137219	1217	0.0895	976	0.0220657	184	136.308
CDC42BPA	1288	6.79359e-08	0.290466	2907	0.15088	771	0.065782	401	0.15898	2147	0.0741205	1478	837.269
MRP63	1289	6.79676e-08	0.280888	2858	0.21882	1389	0.150596	1338	0.0929	1047	0.0395247	592	1848.35
BUB3	1290	6.79821e-08	0.172372	1960	0.22572	1436	0.139264	1233	0.10586	1291	0.0592654	1143	968.25
DSTN	1291	6.80603e-08	0.134778	1489	0.28134	1855	0.250757	2117	0.06836	548	0.0523606	961	4278.73
LOC90410	1292	6.81986e-08	0.154358	1747	0.19594	1190	0.164815	1483	0.10364	1257	0.066011	1287	512.154
TRIM4	1293	6.84558e-08	0.193569	2206	0.1414	710	0.151981	1360	0.08608	915	0.0955985	1910	465.481
PPARBP	1294	6.85151e-08	0.0694366	480	0.26822	1765	0.296269	2357	0.1018	1214	0.0609942	1175	252.173
RDH13	1295	6.89089e-08	0.1038	1017	0.128	583	0.127254	1115	0.1293	1687	0.157621	2633	357.385
POLE3	1296	6.94028e-08	0.0807413	658	0.28382	1868	0.22952	2000	0.10276	1232	0.0642109	1251	630.962
FLJ20013	1297	6.97005e-08	0.269675	2798	0.19332	1174	0.202981	1814	0.06384	462	0.0515925	938	361.654
FLJ13089	1298	7.00312e-08	0.0183344	2	0.29334	1929	0.400515	2703	0.1514	2040	0.10738	2086	611.654
DAG1	1299	7.01338e-08	0.130891	1445	0.2339	1522	0.253781	2131	0.09426	1073	0.0478869	837	1603.17
ACTN4	1300	7.01699e-08	0.221443	2463	0.11374	457	0.0975411	777	0.12178	1560	0.117281	2216	1009.81
PLAA	1301	7.03206e-08	0.113003	1170	0.23482	1528	0.18343	1665	0.12066	1541	0.0598744	1156	273.269
SPC12	1302	7.03663e-08	0.257227	2719	0.14308	721	0.113547	973	0.11	1376	0.0765448	1526	2759.1
TRALPUSH	1303	7.07919e-08	0.158731	1803	0.1353	651	0.123336	1075	0.09994	1182	0.133724	2407	114.423
FLJ10534	1304	7.08098e-08	0.0645001	398	0.32646	2114	0.0859216	650	0.17	2283	0.115124	2179	807.442
BRD2	1305	7.08455e-08	0.148944	1675	0.2247	1429	0.140748	1247	0.1246	1609	0.0603585	1166	2013.62
ACVR1	1306	7.15638e-08	0.0956998	890	0.2455	1609	0.160522	1435	0.14432	1929	0.0657486	1278	360.75
MAPK1	1307	7.15799e-08	0.222001	2470	0.19232	1164	0.063535	368	0.14042	1864	0.0939692	1881	990.5
AEBP2	1308	7.17553e-08	0.10896	1109	0.20406	1265	0.190884	1719	0.11772	1506	0.0718162	1425	282.712
DREV1	1309	7.18082e-08	0.318434	3024	0.22908	1473	0.22113	1936	0.0753	667	0.0295625	354	884.288
PI4K2B	1310	7.20191e-08	0.272074	2811	0.13206	627	0.126854	1111	0.10264	1229	0.0769808	1538	137.096
GNB2L1	1311	7.22264e-08	0.456948	3337	0.38162	2376	0.153726	1380	0.06492	487	0.0207534	166	5486.85
PSMA4	1312	7.23021e-08	0.153412	1734	0.15212	783	0.0951693	754	0.1603	2167	0.101552	2003	820.519
CHD2	1313	7.25255e-08	0.104332	1029	0.4341	2555	0.0993161	793	0.16346	2204	0.0493252	886	429.692
PAICS	1314	7.28313e-08	0.0371812	71	0.37322	2338	0.267711	2218	0.11486	1463	0.0853514	1728	842.615
PLOD	1315	7.30631e-08	0.257138	2718	0.21794	1382	0.121315	1053	0.12	1527	0.044783	740	484.558
MGC22679	1316	7.30673e-08	0.12092	1296	0.30778	2020	0.165432	1492	0.10566	1287	0.0561655	1070	334.173
MRPL27	1317	7.31318e-08	0.176457	2005	0.13754	673	0.100088	806	0.12842	1672	0.11723	2215	522.615
PLXDC2	1318	7.32917e-08	0.0886732	779	0.36796	2318	0.193926	1739	0.1263	1641	0.0458604	775	332.731
NAPG	1319	7.386e-08	0.0657473	416	0.25228	1656	0.190313	1715	0.13334	1757	0.0877474	1777	283.308
G22P1	1320	7.39009e-08	0.264708	2770	0.15642	832	0.170065	1547	0.07686	703	0.0682793	1343	3121.79
APBA3	1321	7.42066e-08	0.135666	1501	0.21764	1378	0.26554	2208	0.08366	857	0.056572	1078	562.135
EAP30	1322	7.43868e-08	0.14819	1666	0.1878	1125	0.153007	1370	0.11778	1507	0.0741676	1480	728.904
RPL28	1323	7.45326e-08	0.504212	3400	0.11656	474	0.0862575	654	0.092	1024	0.0799124	1599	6965.08
RDH14	1324	7.47314e-08	0.184671	2106	0.26052	1721	0.33761	2508	0.08026	789	0.0286658	326	233.827
MAX	1325	7.49945e-08	0.206809	2326	0.22816	1460	0.114031	979	0.13278	1745	0.0524904	964	1298.15
PPP3CB	1326	7.50323e-08	0.353724	3121	0.1884	1134	0.120003	1046	0.08112	810	0.0578361	1108	2444.92
CDC10	1327	7.50884e-08	0.326687	3049	0.14052	705	0.105799	867	0.1073	1317	0.0720507	1432	4673.92
MPI	1328	7.5598e-08	0.19523	2223	0.26832	1766	0.15695	1411	0.1463	1957	0.0314283	399	407.288
DVL1	1329	7.63191e-08	0.206344	2317	0.25936	1715	0.262252	2187	0.09242	1035	0.0294217	349	493.269
CTNNB1	1330	7.63803e-08	0.10936	1118	0.16712	929	0.167746	1518	0.11974	1524	0.104044	2030	760.058
ADRM1	1331	7.66538e-08	0.23037	2533	0.13158	617	0.100935	816	0.10534	1283	0.118932	2240	1509.46
SMYD2	1332	7.66973e-08	0.121056	1301	0.29944	1960	0.369703	2614	0.08736	935	0.0327593	433	953.692
H2AFZ	1333	7.68961e-08	0.145154	1627	0.2132	1343	0.129003	1133	0.1122	1414	0.0858442	1738	1479.75
MRPL47	1334	7.69694e-08	0.27307	2818	0.20786	1294	0.193961	1740	0.07148	600	0.0489091	862	1129.69
PSEN2	1335	7.71065e-08	0.10512	1040	0.26286	1736	0.10954	915	0.14006	1859	0.0909517	1837	311.192
FAM16AX	1336	7.7502e-08	0.106893	1069	0.16152	884	0.136222	1203	0.13746	1821	0.119875	2251	413.327
FLJ10349	1337	7.7768e-08	0.187253	2140	0.17232	985	0.140835	1248	0.09788	1147	0.0874271	1769	326.769
MRPS33	1338	7.78115e-08	0.173762	1978	0.18442	1093	0.248392	2108	0.08366	856	0.0584307	1124	581.077
GMPS	1339	7.7813e-08	0.351369	3112	0.16736	936	0.10315	832	0.09724	1130	0.065969	1285	570.115
MTMR1	1340	7.79996e-08	0.115467	1202	0.24594	1611	0.372255	2620	0.0816	822	0.0452158	755	919.596
PMF1	1341	7.80761e-08	0.186227	2125	0.18066	1053	0.248072	2105	0.07772	718	0.0601891	1163	496.5
EBAG9	1342	7.84739e-08	0.143225	1607	0.23984	1571	0.201806	1808	0.08402	864	0.0673729	1319	323.058
MGC26717	1343	7.8475e-08	0.0539263	251	0.24266	1586	0.167542	1516	0.14166	1889	0.126351	2323	936.365
TNFAIP1	1344	7.88377e-08	0.092416	835	0.14904	759	0.129963	1148	0.14692	1961	0.149899	2558	1147.81
TCF12	1345	7.90471e-08	0.147168	1657	0.19236	1165	0.10623	872	0.15858	2141	0.0828855	1670	730.058
HMG20A	1346	7.92426e-08	0.134442	1484	0.25776	1702	0.139084	1232	0.12732	1655	0.0645729	1259	344.577
SGPP1	1347	7.93077e-08	0.0956411	887	0.26946	1772	0.071993	466	0.21168	2707	0.100977	1992	311.712
PC4	1348	7.94011e-08	0.258044	2729	0.2144	1351	0.0676074	426	0.14012	1861	0.075758	1512	1292.77
HSPC128	1349	7.94751e-08	0.176286	1999	0.30138	1972	0.187564	1692	0.09554	1094	0.0417425	653	171.558
LOH11CR2A	1350	7.96119e-08	0.0503375	208	0.50372	2767	0.255499	2141	0.09444	1076	0.0650678	1271	830.673
CKN1	1351	7.9744e-08	0.116156	1218	0.52282	2811	0.487772	2886	0.07238	622	0.0185988	135	532.231
FLJ23047	1352	7.98253e-08	0.0693764	476	0.2889	1895	0.346181	2539	0.0973	1136	0.0591263	1140	224.385
MLLT10	1353	7.9937e-08	0.0852045	723	0.24942	1636	0.137018	1213	0.18706	2473	0.0733856	1458	528.923
HERPUD1	1354	7.99487e-08	0.699543	3505	0.15046	769	0.0944137	743	0.0924	1034	0.0435396	701	1343.27
LOC88523	1355	8.00298e-08	0.152097	1712	0.25238	1658	0.162113	1454	0.08346	851	0.0770539	1539	296.596
PIK4CB	1356	8.01446e-08	0.0559718	286	0.31102	2034	0.219368	1928	0.10486	1276	0.10008	1979	1044.98
GRB2	1357	8.01489e-08	0.0936055	851	0.26866	1769	0.237765	2048	0.1	1183	0.0670286	1310	1146.37
NRPS998	1358	8.01872e-08	0.072374	523	0.26348	1738	0.175828	1595	0.14012	1862	0.0853498	1727	283.231
FLJ22875	1359	8.01893e-08	0.17858	2033	0.2627	1734	0.22243	1949	0.11414	1450	0.0336674	449	830.75
RFC1	1360	8.02977e-08	0.0861054	739	0.20628	1280	0.176172	1600	0.1139	1448	0.11266	2149	474.115
LAP1B	1361	8.10548e-08	0.0869971	753	0.17636	1021	0.132613	1171	0.14432	1928	0.138031	2456	828.769
USP52	1362	8.10968e-08	0.340822	3085	0.14146	711	0.0906088	702	0.12494	1617	0.0742995	1483	221.788
RBM15	1363	8.12356e-08	0.443369	3321	0.12634	568	0.0968143	768	0.09176	1019	0.0816324	1637	121.269
EXTL2	1364	8.13517e-08	0.169776	1926	0.20864	1302	0.241644	2073	0.0846	875	0.0561773	1071	942.519
ADNP	1365	8.16518e-08	0.203918	2300	0.18632	1113	0.118165	1026	0.12442	1606	0.073095	1451	656.5
FLJ22729	1366	8.18109e-08	0.199114	2260	0.2418	1581	0.263847	2198	0.0787	751	0.0409207	623	111.058
HNRPDL	1367	8.18291e-08	0.170003	1928	0.19626	1194	0.0936356	730	0.14796	1974	0.0885217	1794	1984.42
HSPE1	1368	8.20634e-08	0.107304	1077	0.27292	1795	0.145828	1300	0.16802	2254	0.057189	1092	767.827
NDUFB10	1369	8.22718e-08	0.411085	3264	0.17782	1029	0.157918	1416	0.09628	1106	0.0370158	528	4272.17
FLJ12586	1370	8.24683e-08	0.183166	2088	0.213	1341	0.186541	1689	0.09136	1011	0.0620223	1205	149.25
FLJ21749	1371	8.29852e-08	0.139934	1570	0.27154	1784	0.269343	2225	0.08506	888	0.047668	833	626.635
HNRPH3	1372	8.3243e-08	0.157114	1786	0.15812	853	0.115731	1001	0.13742	1820	0.105356	2048	1057.33
STX12	1373	8.36884e-08	0.219122	2444	0.17238	986	0.110041	921	0.12044	1535	0.0835957	1686	759.308
UBP1	1374	8.3727e-08	0.155225	1764	0.2537	1669	0.238661	2052	0.09048	989	0.0492338	884	485.558
MGST3	1375	8.42303e-08	0.284809	2880	0.20784	1293	0.223728	1960	0.0751	664	0.0423488	668	4502.29
NDUFA9	1376	8.44389e-08	0.298944	2937	0.20658	1283	0.180749	1636	0.08372	858	0.0451831	754	1196.79
MRPL22	1377	8.44629e-08	0.107656	1084	0.286	1879	0.0747176	503	0.21272	2715	0.0863072	1747	499.942
PPM1B	1378	8.50993e-08	0.0876534	766	0.24194	1583	0.162922	1462	0.1456	1945	0.0845908	1712	708.75
MGC874	1379	8.53609e-08	0.115939	1211	0.19896	1219	0.162744	1458	0.10616	1294	0.107106	2082	177.615
MRPL42	1380	8.5523e-08	0.715141	3510	0.10626	398	0.0710336	458	0.10232	1223	0.0774305	1545	266.288
ATP2B4	1381	8.57035e-08	0.0522732	238	0.28282	1864	0.211121	1871	0.17332	2322	0.0792216	1578	1541.96
AMSH-LP	1382	8.57739e-08	0.240442	2614	0.2179	1380	0.174067	1578	0.1144	1455	0.0411113	631	196.212
TUBGCP3	1383	8.58459e-08	0.196623	2240	0.26204	1731	0.15244	1365	0.1482	1977	0.0368795	525	196.538
BAG5	1384	8.62027e-08	0.119262	1281	0.2528	1660	0.265524	2207	0.09722	1129	0.0553859	1054	883.25
KIAA0893	1385	8.67712e-08	0.326869	3051	0.19486	1185	0.151209	1348	0.08464	877	0.0532282	982	1053.69
FIP1L1	1386	8.6834e-08	0.334837	3074	0.17008	965	0.155288	1396	0.0949	1080	0.0517386	942	113.731
CDK11	1387	8.69882e-08	0.258518	2733	0.24456	1603	0.121035	1052	0.10318	1247	0.0550926	1041	858.865
HSBP1	1388	8.71344e-08	0.193414	2204	0.25598	1685	0.135474	1197	0.1019	1215	0.0637502	1239	2271.25
MUF1	1389	8.75174e-08	0.134356	1481	0.17664	1023	0.166033	1499	0.12718	1652	0.0873272	1767	433.154
EIF3S9	1390	8.76384e-08	0.126653	1392	0.1968	1204	0.177984	1617	0.1022	1220	0.0966581	1935	1520.52
TMP21	1391	8.78551e-08	0.135166	1495	0.28102	1852	0.163255	1465	0.10766	1327	0.065805	1282	1262
RNF14	1392	8.79678e-08	0.108975	1111	0.26442	1749	0.135844	1200	0.1438	1920	0.0781478	1558	540.096
FLJ11029	1393	8.79854e-08	0.112653	1166	0.15664	836	0.118088	1023	0.16692	2239	0.126494	2329	1003.23
ICMT	1394	8.82165e-08	0.0417987	100	0.36512	2297	0.337693	2509	0.10872	1340	0.078729	1572	796.25
GM2A	1395	8.8514e-08	0.0815324	674	0.31608	2062	0.262571	2191	0.1261	1637	0.0518726	946	937.173
JTB	1396	8.87624e-08	0.185735	2116	0.2293	1474	0.27529	2264	0.06934	568	0.0545975	1030	4045.98
FLJ20989	1397	8.89551e-08	0.142347	1596	0.29912	1959	0.401446	2704	0.0882	949	0.0295052	352	625.096
EDF1	1398	8.90356e-08	0.0773631	592	0.21898	1390	0.182463	1658	0.12244	1571	0.117637	2224	1616.21
DP1	1399	8.92497e-08	0.166576	1888	0.19908	1220	0.095754	760	0.13238	1738	0.10617	2064	2473.54
MRPS14	1400	8.92514e-08	0.115564	1203	0.25482	1676	0.129461	1143	0.15852	2139	0.0738504	1465	930.25
FNTA	1401	8.95028e-08	0.207785	2335	0.18702	1118	0.124546	1087	0.13164	1726	0.0702476	1384	1601
POP5	1402	9.0143e-08	0.0724969	524	0.39254	2409	0.282494	2297	0.12064	1540	0.0464776	790	740.423
TOR3A	1403	9.03401e-08	0.378106	3193	0.10904	424	0.104564	851	0.0901	983	0.116302	2202	408.519
KIAA0252	1404	9.04854e-08	0.117334	1244	0.30728	2016	0.310298	2413	0.10682	1307	0.0378621	554	506.154
DHPS	1405	9.06398e-08	0.289373	2902	0.2661	1754	0.0996059	798	0.10768	1328	0.0548797	1036	405.385
TM9SF1	1406	9.09528e-08	0.134006	1475	0.1786	1036	0.10811	893	0.14262	1908	0.123248	2283	708.5
ATP5S	1407	9.10708e-08	0.048957	183	0.3421	2184	0.0998639	802	0.19868	2597	0.137045	2444	499.577
MRPS17	1408	9.11753e-08	0.0515809	232	0.26718	1758	0.193373	1736	0.1917	2535	0.0892448	1808	596.577
FBXW5	1409	9.11843e-08	0.286937	2894	0.13504	649	0.139994	1242	0.10882	1342	0.0772446	1542	1273.73
DCTN1	1410	9.13535e-08	0.100865	971	0.36446	2290	0.595357	3058	0.05608	326	0.0372188	532	2366.79
CLYBL	1411	9.16661e-08	0.605446	3469	0.1424	715	0.0867836	658	0.08436	870	0.0726213	1443	68.6731
PDHX	1412	9.17425e-08	0.0942092	865	0.3124	2045	0.270037	2228	0.10956	1364	0.0526873	970	628.865
VPS4B	1413	9.18217e-08	0.117659	1255	0.30836	2023	0.197447	1776	0.12854	1674	0.0498639	902	628.462
HSCARG	1414	9.2002e-08	0.399474	3238	0.1765	1022	0.0853994	644	0.14058	1870	0.0543501	1022	171.192
ARF4L	1415	9.23634e-08	0.0497468	197	0.20222	1247	0.308973	2411	0.11624	1486	0.127835	2352	877.885
FLOT1	1416	9.28064e-08	0.0557645	279	0.35418	2241	0.27214	2241	0.12386	1596	0.0697089	1372	3300.98
MGC5306	1417	9.30252e-08	0.103971	1022	0.24004	1572	0.0999395	804	0.17458	2336	0.106829	2077	395.5
SQSTM1	1418	9.30957e-08	0.138348	1547	0.27068	1778	0.189766	1711	0.10972	1368	0.0597051	1149	2587.6
PPIG	1419	9.31315e-08	0.0587952	331	0.20446	1267	0.12173	1061	0.20908	2683	0.152213	2576	1402.33
ABCF2	1420	9.32888e-08	0.0234388	7	0.58116	2922	0.473653	2861	0.10648	1296	0.0679024	1335	746.673
THOC1	1421	9.34087e-08	0.355886	3129	0.15408	803	0.0826442	600	0.12166	1556	0.0847199	1714	458.577
NISCH	1422	9.3614e-08	0.146627	1647	0.31788	2068	0.125023	1093	0.10114	1201	0.0794268	1591	2636.02
ZNF364	1423	9.3687e-08	0.0769568	582	0.1966	1200	0.226702	1982	0.09784	1145	0.139602	2479	807.404
PSMB7	1424	9.37101e-08	0.0712765	506	0.20676	1285	0.163249	1464	0.14714	1965	0.132376	2396	1704.54
DPM1	1425	9.42856e-08	0.133506	1469	0.27356	1798	0.147788	1316	0.14526	1944	0.0601344	1162	562.788
ACAT1	1426	9.43625e-08	0.310988	2981	0.15536	820	0.204742	1823	0.0748	659	0.063771	1240	1763.63
TUBGCP5	1427	9.43808e-08	0.306257	2963	0.19248	1166	0.185067	1682	0.09112	1002	0.0474772	825	73.6923
BNIP3L	1428	9.46969e-08	0.0513258	226	0.25196	1652	0.189647	1710	0.15326	2063	0.125982	2320	1449.6
FLJ11046	1429	9.47703e-08	0.0959628	894	0.12626	566	0.178692	1621	0.12746	1658	0.171728	2728	441.077
KIAA0582	1430	9.50949e-08	0.0858797	735	0.2365	1540	0.14191	1257	0.17984	2396	0.0917385	1846	835.423
RPS5	1431	9.58227e-08	0.604787	3468	0.16574	917	0.15095	1342	0.07778	723	0.0407149	616	4874.46
SSH1	1432	9.58389e-08	0.0450165	139	0.24456	1602	0.162901	1461	0.18758	2483	0.142459	2504	1063.87
SEL1L	1433	9.60049e-08	0.100914	974	0.15512	816	0.158138	1419	0.12136	1551	0.1598	2650	968.135
PDAP1	1434	9.61606e-08	0.187027	2137	0.19668	1201	0.184292	1673	0.08528	897	0.083175	1680	502.038
STARD3NL	1435	9.61704e-08	0.0934541	849	0.29536	1947	0.170607	1552	0.1391	1846	0.0734144	1460	1269.35
CAMK2B	1436	9.62875e-08	0.251254	2688	0.15948	863	0.127744	1120	0.12702	1647	0.0740547	1473	2677.77
AKT3	1437	9.69542e-08	0.0824306	689	0.2774	1826	0.16588	1498	0.17984	2397	0.0710735	1402	350.788
SPOP	1438	9.71729e-08	0.0817023	679	0.2795	1842	0.164321	1476	0.13738	1818	0.0942603	1885	1021.44
CUL1	1439	9.72194e-08	0.309157	2975	0.24276	1588	0.103424	834	0.11884	1518	0.0527022	971	734.673
PI4KII	1440	9.74327e-08	0.0481712	174	0.32	2082	0.228513	1993	0.1329	1748	0.104075	2032	963.192
PHF10	1441	9.74622e-08	0.148582	1670	0.21758	1376	0.109309	914	0.15426	2076	0.0894037	1811	675.788
PC326	1442	9.75598e-08	0.208004	2339	0.24328	1593	0.138313	1228	0.11336	1433	0.0614873	1191	623.231
MGC5297	1443	9.77698e-08	0.139361	1560	0.3814	2374	0.213296	1885	0.14058	1871	0.0306755	382	206.058
PPP2CB	1444	9.8047e-08	0.259341	2738	0.19414	1179	0.19832	1784	0.08008	784	0.0613159	1184	3377.54
GNA13	1445	9.8203e-08	0.138039	1541	0.36474	2293	0.0757075	517	0.18776	2490	0.0686143	1348	175.308
SCYE1	1446	9.84808e-08	0.0682058	455	0.38298	2380	0.230222	2004	0.11632	1487	0.0703992	1387	694.673
FLJ10853	1447	9.89633e-08	0.157064	1783	0.21516	1354	0.108982	908	0.14082	1875	0.0954189	1906	529.212
GOLGB1	1448	9.90466e-08	0.0795316	632	0.16028	874	0.151174	1347	0.13046	1704	0.197007	2895	765.673
PIP5K1B	1449	9.91751e-08	0.0791419	624	0.24386	1598	0.18003	1627	0.1338	1766	0.106677	2073	740.596
MLL3	1450	9.93771e-08	0.0751488	560	0.3039	1988	0.16345	1467	0.16728	2248	0.0795831	1596	417.712
IDH3B	1451	9.99675e-08	0.118762	1275	0.28428	1871	0.168149	1523	0.1041	1266	0.0845871	1710	1770.9
NUMB	1452	1.00016e-07	0.195035	2220	0.25074	1642	0.174118	1579	0.10442	1271	0.0562497	1072	280.096
MAGI-3	1453	1.00028e-07	0.0940274	861	0.25542	1681	0.214116	1890	0.1055	1284	0.0921988	1853	403.192
FLJ22557	1454	1.00472e-07	0.22779	2513	0.30776	2019	0.0569132	304	0.207	2665	0.0608318	1174	315.231
USP28	1455	1.00656e-07	0.029266	29	0.386	2387	0.509819	2920	0.10516	1277	0.0831067	1679	969.077
HMGCL	1456	1.00797e-07	0.677984	3496	0.14976	765	0.131527	1163	0.07164	602	0.0526841	969	1260.87
SNX5	1457	1.01188e-07	0.196237	2235	0.24272	1587	0.105062	859	0.12058	1539	0.0838568	1692	605.769
HDAC1	1458	1.01278e-07	0.215444	2409	0.22846	1464	0.0945399	746	0.14402	1924	0.0755699	1507	245.75
UBQLN1	1459	1.01336e-07	0.131014	1447	0.21228	1335	0.142867	1269	0.13096	1713	0.0973824	1943	473.692
LOC159090	1460	1.01435e-07	0.183396	2092	0.23922	1565	0.37159	2617	0.0822	834	0.0378514	553	435.615
KTN1	1461	1.01453e-07	0.207266	2330	0.12436	547	0.1187	1034	0.12966	1694	0.127884	2353	1327.08
PDHB	1462	1.01547e-07	0.191491	2173	0.23318	1518	0.0816567	587	0.1387	1841	0.10041	1984	1146.58
TDE1	1463	1.02348e-07	0.0945174	867	0.17988	1046	0.12595	1100	0.146	1953	0.1637	2670	2481.75
POLR1B	1464	1.02518e-07	0.0602204	352	0.25402	1671	0.142727	1265	0.17436	2335	0.134663	2419	994.923
COQ3	1465	1.03496e-07	0.0460992	146	0.27438	1800	0.212012	1876	0.15622	2108	0.123537	2288	569.404
ADSL	1466	1.03647e-07	0.106634	1064	0.32582	2109	0.288211	2321	0.0967	1115	0.0535258	989	867.654
INPP1	1467	1.03899e-07	0.179754	2050	0.22968	1480	0.150072	1331	0.12308	1582	0.0681299	1341	1478.06
SHARP	1468	1.0415e-07	0.0821763	684	0.24112	1578	0.130415	1153	0.20456	2651	0.0985249	1958	1453.88
PRO1855	1469	1.04245e-07	0.0866699	747	0.22874	1469	0.153192	1373	0.1527	2054	0.112405	2144	1232.12
HSU79274	1470	1.04579e-07	0.229032	2526	0.16274	891	0.113074	967	0.11518	1466	0.107728	2095	1013.5
DKFZP564B1023	1471	1.04902e-07	0.0971202	913	0.40796	2472	0.47431	2863	0.07074	594	0.0394588	590	3742.08
PSMC2	1472	1.05278e-07	0.0583385	323	0.73046	3125	0.615882	3081	0.0766	695	0.0261864	277	1151.6
FLJ38725	1473	1.05331e-07	0.0704037	494	0.3258	2108	0.0660659	404	0.22072	2780	0.157473	2631	265.327
RPS27A	1474	1.05424e-07	0.144667	1620	0.37226	2335	0.43928	2781	0.0599	399	0.0372022	531	6558.37
P29	1475	1.05505e-07	0.388	3213	0.241	1577	0.142963	1270	0.07294	630	0.0541067	1014	273.096
PABPC3	1476	1.05782e-07	0.41722	3274	0.13102	610	0.0660938	405	0.13276	1744	0.11028	2120	2703.75
KIAA0140	1477	1.05809e-07	0.0542304	255	0.34438	2196	0.270661	2233	0.11288	1429	0.0927289	1865	1060.37
WBP2	1478	1.06445e-07	0.209115	2348	0.13724	670	0.108969	907	0.13362	1763	0.12738	2343	2025.71
MGC10765	1479	1.06677e-07	0.137989	1540	0.21618	1365	0.108839	903	0.1418	1893	0.115869	2193	190.231
ALDH2	1480	1.06714e-07	0.42607	3292	0.27556	1811	0.19711	1771	0.05886	382	0.0391752	586	4039.08
SRRM2	1481	1.06773e-07	0.134645	1488	0.2176	1377	0.0934394	724	0.21474	2734	0.0908214	1831	1451.06
TGDS	1482	1.07021e-07	0.0555006	275	0.23046	1488	0.139628	1238	0.17282	2319	0.17339	2746	424.288
TAS2R14	1483	1.07064e-07	0.086571	745	0.25642	1691	0.160613	1436	0.1654	2221	0.090786	1829	461.654
ADAM17	1484	1.07113e-07	0.0590691	335	0.34322	2190	0.328163	2477	0.14112	1879	0.0570486	1088	428.442
GLRX	1485	1.0717e-07	0.231506	2543	0.21754	1375	0.109175	913	0.15814	2133	0.0616342	1196	755.038
FLJ14431	1486	1.07243e-07	0.116011	1212	0.22018	1396	0.204201	1821	0.13142	1720	0.0782326	1561	481.058
M6PR	1487	1.07545e-07	0.120059	1288	0.2192	1391	0.0927704	717	0.1659	2228	0.132774	2400	704.538
AMPH	1488	1.0755e-07	0.247751	2668	0.232	1509	0.191073	1721	0.10252	1228	0.0477656	835	1210.81
OSRF	1489	1.07608e-07	0.211411	2379	0.20098	1232	0.220262	1932	0.11036	1383	0.0520989	956	176.192
CRYZL1	1490	1.0785e-07	0.0843275	707	0.35194	2228	0.238301	2049	0.13492	1787	0.0565194	1077	388.596
MRPS30	1491	1.07855e-07	0.0694021	477	0.55382	2874	0.32399	2466	0.11204	1412	0.0386553	574	529.981
FKBP4	1492	1.07936e-07	0.187967	2145	0.21874	1388	0.077071	536	0.17906	2387	0.0951228	1902	1471.21
TAX1BP1	1493	1.08069e-07	0.133743	1473	0.27148	1783	0.0847994	629	0.15974	2158	0.109876	2115	1841.31
PSMB3	1494	1.08086e-07	0.370852	3173	0.21564	1358	0.124138	1080	0.1028	1235	0.0529609	980	2041.15
CCT4	1495	1.08254e-07	0.123344	1338	0.173	991	0.173145	1570	0.12714	1651	0.11524	2182	2495.27
RAP1B	1496	1.08382e-07	0.195655	2228	0.23036	1486	0.072014	467	0.15748	2122	0.106031	2058	889.25
SSB	1497	1.08639e-07	0.140219	1574	0.1781	1033	0.169431	1540	0.12432	1605	0.103276	2024	378.5
FAF1	1498	1.08808e-07	0.613773	3474	0.17554	1013	0.168119	1522	0.0608	414	0.0494053	890	417.173
MKRN1	1499	1.09291e-07	0.393557	3223	0.19482	1183	0.183212	1664	0.08594	910	0.0452699	756	1241.33
PCMT1	1500	1.093e-07	0.187395	2141	0.18666	1116	0.0947142	749	0.1662	2232	0.0992611	1968	1698.4
KCNQ4	1501	1.0959e-07	0.0904184	804	0.44386	2601	0.818806	3261	0.06222	432	0.0268023	286	228.442
UBXD2	1502	1.09605e-07	0.0499262	202	0.25758	1698	0.160085	1430	0.17828	2379	0.149332	2552	712.577
GTF2A2	1503	1.09709e-07	0.565723	3445	0.18822	1133	0.162893	1460	0.07594	682	0.0416499	651	1218.88
CRADD	1504	1.0974e-07	0.0389314	83	0.26656	1755	0.178178	1618	0.19816	2589	0.149767	2556	815.692
BIG1	1505	1.09855e-07	0.0934069	848	0.15638	830	0.146669	1310	0.154	2074	0.166501	2692	623.038
SRP19	1506	1.099e-07	0.0301727	36	0.34658	2206	0.23835	2051	0.20466	2652	0.107732	2096	1144.35
TBK1	1507	1.10052e-07	0.127468	1406	0.18888	1141	0.195593	1758	0.1075	1322	0.108709	2105	729.038
ZNF323	1508	1.10088e-07	0.142915	1605	0.18294	1083	0.117488	1017	0.15006	2007	0.119429	2245	175.558
FLJ10378	1509	1.1009e-07	0.150636	1693	0.30662	2011	0.192552	1730	0.15068	2024	0.0410798	630	203.731
COX11	1510	1.10179e-07	0.100472	963	0.20626	1278	0.121634	1060	0.16944	2278	0.128998	2368	522.75
USP15	1511	1.1066e-07	0.105837	1048	0.22162	1409	0.0917413	709	0.16486	2215	0.155984	2615	551.904
HEBP1	1512	1.11509e-07	0.246619	2662	0.22446	1428	0.124151	1082	0.12918	1685	0.0628078	1223	1014.52
ZNF331	1513	1.11785e-07	0.0576831	315	0.2169	1369	0.124501	1086	0.22906	2819	0.156664	2621	1045.54
SCA7	1514	1.12315e-07	0.138213	1546	0.20386	1262	0.112726	963	0.19024	2518	0.0929492	1869	315.865
ARV1	1515	1.12797e-07	0.151184	1701	0.23176	1506	0.358053	2583	0.0854	902	0.0526457	968	567.442
NRD1	1516	1.13257e-07	0.258706	2737	0.18472	1096	0.0895764	691	0.15022	2010	0.0880721	1782	1554.12
DHX36	1517	1.13983e-07	0.186922	2135	0.2894	1901	0.272331	2243	0.1041	1267	0.0371664	530	478.327
RAC2	1518	1.14062e-07	0.431242	3303	0.16984	961	0.0730666	475	0.15328	2064	0.0695332	1368	673.077
RNF20	1519	1.15233e-07	0.0974632	919	0.26122	1727	0.107717	888	0.1752	2343	0.119929	2254	1020.71
NQO1	1520	1.15234e-07	0.0779616	602	0.27958	1843	0.0825497	599	0.23866	2875	0.134188	2411	865.442
STOML2	1521	1.15319e-07	0.381047	3202	0.17408	1000	0.143743	1283	0.10236	1224	0.059084	1138	572.981
KIAA0141	1522	1.15452e-07	0.0876612	767	0.37524	2346	0.392817	2682	0.07962	776	0.0561161	1069	489.423
TMEM14B	1523	1.15525e-07	0.172382	1961	0.31438	2054	0.0981021	781	0.1421	1896	0.0764669	1524	654.75
FLJ22471	1524	1.15822e-07	0.19736	2246	0.22854	1466	0.274823	2260	0.08182	829	0.0571049	1090	2815.96
PLOD3	1525	1.15896e-07	0.109272	1116	0.2394	1567	0.0952898	755	0.20124	2624	0.115529	2189	1621.27
SH3KBP1	1526	1.16578e-07	0.0648908	401	0.4116	2484	0.11831	1029	0.1415	1886	0.130375	2377	2234.56
SMAP	1527	1.17236e-07	0.117103	1237	0.16942	958	0.150721	1341	0.14458	1935	0.1356	2428	1299.19
KDELR1	1528	1.17566e-07	0.248765	2676	0.2475	1619	0.295764	2354	0.07024	584	0.0459625	778	421.192
CGRRF1	1529	1.1787e-07	0.11853	1270	0.23758	1551	0.192979	1732	0.11068	1388	0.0979942	1949	537.038
FLJ14803	1530	1.17886e-07	0.297151	2933	0.22286	1416	0.189619	1709	0.11358	1441	0.041332	640	106.558
NDUFA11	1531	1.18048e-07	0.645634	3486	0.16822	944	0.110515	931	0.08182	828	0.0601075	1160	3206.98
RPS6KC1	1532	1.18084e-07	0.0663719	429	0.3614	2275	0.2556	2143	0.1173	1503	0.0821059	1651	655.615
AF5Q31	1533	1.18254e-07	0.41831	3280	0.16584	920	0.131888	1166	0.11126	1394	0.0580898	1114	343.673
HSD17B12	1534	1.1828e-07	0.107251	1075	0.27642	1816	0.27971	2284	0.13788	1828	0.0517306	941	1374.62
MARS	1535	1.18821e-07	0.0340231	56	0.34542	2201	0.238745	2055	0.1551	2087	0.136534	2438	1713.31
SSBP1	1536	1.19149e-07	0.111337	1145	0.243	1590	0.168858	1533	0.13154	1722	0.0991472	1966	537.231
FLJ20489	1537	1.19597e-07	0.257915	2728	0.31466	2055	0.175605	1594	0.0851	889	0.0493117	885	1508.79
COX7B	1538	1.19716e-07	0.210813	2368	0.223	1418	0.25132	2119	0.08292	841	0.0611055	1178	1986.13
XDH	1539	1.19726e-07	0.0565842	294	0.30462	1991	0.510476	2922	0.06988	575	0.0973692	1942	1040.6
PTK2	1540	1.20429e-07	0.213498	2396	0.29684	1954	0.1503	1334	0.1423	1899	0.0444291	731	863.462
HNRPU	1541	1.21646e-07	0.148197	1667	0.23564	1534	0.260004	2167	0.09306	1051	0.0719914	1429	1923.96
MRCL3	1542	1.2179e-07	0.458249	3340	0.16	869	0.110204	924	0.09508	1085	0.0792723	1581	744.788
FLJ12178	1543	1.21797e-07	0.195727	2229	0.22606	1443	0.156595	1406	0.15142	2041	0.0580515	1113	549.942
LOC152485	1544	1.23401e-07	0.0812216	669	0.2813	1854	0.359575	2586	0.11344	1437	0.0662118	1292	406.423
RAB33B	1545	1.23507e-07	0.20498	2309	0.24524	1606	0.354226	2568	0.08112	811	0.0427559	680	193.096
CTNS	1546	1.23591e-07	0.174009	1984	0.21792	1381	0.209101	1861	0.10678	1304	0.0729941	1449	470.019
MGC4268	1547	1.24614e-07	0.101441	984	0.2491	1629	0.222079	1943	0.11594	1482	0.0957756	1914	397.481
CD53	1548	1.24699e-07	0.0575332	310	0.27826	1832	0.102524	827	0.3023	3136	0.125674	2315	1171.58
EIF4EBP2	1549	1.2523e-07	0.118912	1277	0.22674	1447	0.103738	837	0.16378	2206	0.136701	2441	398.192
HLA-G	1550	1.25525e-07	0.276319	2833	0.20628	1281	0.231507	2012	0.11676	1493	0.04074	619	3973.71
PIK3R4	1551	1.25572e-07	0.0707497	499	0.49204	2742	0.344818	2533	0.07774	720	0.0672899	1317	393.635
FGFR1OP	1552	1.25587e-07	0.680266	3497	0.18602	1109	0.14491	1288	0.07322	636	0.0467731	801	338.327
SKP2	1553	1.25781e-07	0.0824901	691	0.32602	2111	0.270644	2232	0.15922	2153	0.0542734	1021	443.942
RSN	1554	1.25782e-07	0.149249	1678	0.19362	1175	0.193056	1734	0.12802	1666	0.0880669	1781	533.038
NAP1L4	1555	1.2625e-07	0.129674	1430	0.2154	1355	0.192375	1729	0.11586	1480	0.101407	2001	1031.77
STAT2	1556	1.26312e-07	0.247755	2669	0.20712	1288	0.128648	1128	0.08978	978	0.10657	2070	493.538
SMARCC2	1557	1.26378e-07	0.105337	1041	0.30642	2010	0.145635	1298	0.16696	2242	0.0805217	1610	812.5
MESP1	1558	1.27151e-07	0.37736	3189	0.19074	1156	0.206131	1835	0.0965	1109	0.0444085	729	105.538
MBTPS1	1559	1.27174e-07	0.14552	1633	0.31062	2032	0.337934	2511	0.07898	759	0.0527125	973	601.019
PEX3	1560	1.27186e-07	0.0790981	623	0.26126	1729	0.171667	1562	0.14002	1857	0.128038	2355	394.404
RRN3	1561	1.27913e-07	0.109052	1113	0.25126	1646	0.232466	2015	0.1282	1670	0.0783297	1563	460.538
CLEC1	1562	1.28047e-07	0.120734	1293	0.2315	1504	0.172547	1567	0.15604	2105	0.0850868	1721	480.077
OLR1	1563	1.28154e-07	0.0972993	915	0.15818	854	0.221631	1939	0.11108	1392	0.16913	2710	216.904
DNCLI2	1564	1.28308e-07	0.241285	2623	0.16292	895	0.110472	930	0.13338	1759	0.110769	2127	1682.63
CDC42EP4	1565	1.28362e-07	0.109973	1125	0.2216	1408	0.165518	1493	0.13996	1856	0.113697	2165	1811.71
LCP1	1566	1.28503e-07	0.177504	2017	0.22446	1427	0.0821723	594	0.18502	2451	0.106081	2061	581.173
ITM2B	1567	1.28606e-07	0.227978	2514	0.19628	1195	0.235788	2033	0.07342	637	0.0830175	1676	6342.54
TOB2	1568	1.28877e-07	0.202909	2291	0.22006	1395	0.0644846	380	0.19694	2580	0.113648	2162	441.577
SLC35A2	1569	1.28939e-07	0.047471	165	0.23972	1570	0.381626	2654	0.11292	1430	0.13148	2385	489.231
ARL6	1570	1.28962e-07	0.117503	1250	0.47448	2695	0.42798	2768	0.06128	420	0.0441029	716	219.365
RALA	1571	1.29168e-07	0.113946	1184	0.2541	1672	0.205597	1830	0.13936	1852	0.0778594	1553	211.577
CSNK2A2	1572	1.29482e-07	0.551094	3434	0.16592	921	0.114924	989	0.10928	1353	0.0563834	1073	873.75
SDFR1	1573	1.29839e-07	0.262888	2760	0.2308	1494	0.262919	2193	0.07312	632	0.0556616	1059	4071.06
USP1	1574	1.29896e-07	0.396253	3229	0.20614	1276	0.0585113	320	0.1527	2053	0.0890017	1804	585.865
FLJ30294	1575	1.30185e-07	0.0428487	118	0.16584	919	0.222526	1951	0.15882	2142	0.259216	3139	739.365
TIMM13	1576	1.30413e-07	0.197414	2247	0.23076	1492	0.172563	1568	0.10876	1341	0.0762746	1521	630.365
UBE2N	1577	1.30546e-07	0.372634	3175	0.19794	1212	0.104833	854	0.11694	1496	0.0721941	1434	2196.38
RRBP1	1578	1.30652e-07	0.506967	3403	0.1706	968	0.0759081	521	0.1312	1718	0.0758495	1515	710.173
KIAA1007	1579	1.31031e-07	0.257341	2721	0.1535	798	0.113613	975	0.12974	1696	0.112531	2148	1822.15
RPA1	1580	1.32659e-07	0.0485044	176	0.3229	2095	0.166734	1502	0.16298	2199	0.155863	2611	489.808
MGC16169	1581	1.32879e-07	0.0239339	9	0.51236	2788	0.263489	2196	0.21286	2717	0.096611	1934	1156.56
UCHL5	1582	1.32913e-07	0.116128	1215	0.25472	1674	0.340585	2519	0.1121	1413	0.0588507	1133	425.5
CFDP1	1583	1.33051e-07	0.153549	1735	0.2409	1575	0.118611	1032	0.17748	2372	0.0854429	1731	661.923
CYFIP1	1584	1.331e-07	0.160479	1819	0.23804	1554	0.197296	1773	0.10654	1297	0.0828885	1671	1084
USP13	1585	1.34297e-07	0.226489	2501	0.23884	1560	0.213335	1887	0.10746	1321	0.0541523	1017	803.058
DUSP13	1586	1.34304e-07	0.209023	2346	0.18202	1069	0.253132	2128	0.085	886	0.0820404	1649	928.962
UBE2B	1587	1.34406e-07	0.0961457	899	0.4073	2467	0.232319	2014	0.11434	1454	0.0646111	1260	1008.85
PHLDA2	1588	1.34762e-07	0.245245	2652	0.2131	1342	0.217717	1918	0.09476	1078	0.0625003	1215	229.385
SNX9	1589	1.35611e-07	0.106748	1066	0.36438	2289	0.419777	2750	0.08796	946	0.0472164	818	703.577
ALG5	1590	1.35669e-07	0.0574853	309	0.23194	1507	0.193814	1738	0.17742	2371	0.14797	2542	638.346
CNOT8	1591	1.36201e-07	0.0848324	715	0.28062	1850	0.158178	1421	0.17978	2393	0.100607	1988	548.981
MLF2	1592	1.36535e-07	0.151597	1706	0.40876	2475	0.728159	3203	0.05456	303	0.0277332	309	2083.69
CDK8	1593	1.36622e-07	0.14862	1671	0.18088	1055	0.135519	1198	0.14662	1959	0.127901	2354	138.596
GAP43	1594	1.37095e-07	0.336638	3077	0.10778	411	0.185561	1684	0.07594	683	0.134085	2410	2928.31
TMEM5	1595	1.37129e-07	0.15112	1699	0.28302	1865	0.143901	1284	0.159	2148	0.0700724	1380	912.288
SHOC2	1596	1.37193e-07	0.125474	1373	0.15416	804	0.165075	1486	0.12206	1567	0.176023	2765	757.923
EIF4G2	1597	1.37224e-07	0.166218	1883	0.12162	521	0.15513	1394	0.11978	1525	0.182677	2804	3744.65
VAPB	1598	1.37417e-07	0.0864776	744	0.37838	2360	0.25804	2157	0.10924	1351	0.0744996	1489	690.192
RNF130	1599	1.37426e-07	0.2947	2924	0.22992	1482	0.126103	1103	0.12652	1643	0.0635687	1234	838.962
CUL3	1600	1.37747e-07	0.567178	3448	0.16674	926	0.110232	925	0.10936	1355	0.060419	1168	1610.46
ARPP-19	1601	1.38427e-07	0.234992	2568	0.2244	1426	0.128206	1125	0.12296	1579	0.0832701	1681	2850.31
DNCL2A	1602	1.40264e-07	0.203327	2295	0.31806	2070	0.304662	2390	0.07702	706	0.0462205	784	3919.04
PGF	1603	1.40269e-07	0.0709338	504	0.19654	1199	0.152089	1361	0.21694	2749	0.152487	2577	2235.83
C1QDC1	1604	1.40372e-07	0.131542	1450	0.20162	1239	0.16761	1517	0.1321	1735	0.119535	2247	867.75
MAPKAP1	1605	1.40791e-07	0.0594583	339	0.47696	2702	0.194694	1746	0.1627	2195	0.078371	1564	783.692
ATP5G2	1606	1.40852e-07	0.414999	3271	0.18544	1102	0.168573	1527	0.08458	874	0.0641908	1250	1655.9
B3GNT6	1607	1.40863e-07	0.280631	2855	0.30302	1981	0.210753	1867	0.08168	824	0.0481188	842	2538.75
SLC35B3	1608	1.40996e-07	0.0391147	85	0.36494	2295	0.234956	2029	0.2109	2703	0.0996782	1972	419.788
MRPS2	1609	1.41072e-07	0.105494	1043	0.28452	1872	0.168991	1536	0.1598	2160	0.0870314	1761	353.519
REC14	1610	1.41252e-07	0.166918	1896	0.27768	1828	0.15601	1403	0.15968	2157	0.0611728	1180	572.423
FLJ21924	1611	1.41334e-07	0.104772	1038	0.25894	1708	0.150584	1337	0.17496	2340	0.0988779	1962	192.212
MRPL1	1612	1.41829e-07	0.0962625	901	0.344	2193	0.160464	1434	0.1416	1888	0.0942588	1884	532.962
NIF3L1BP1	1613	1.42508e-07	0.0977334	924	0.32808	2121	0.19986	1792	0.126	1633	0.088254	1788	518.269
CRSP9	1614	1.42948e-07	0.141714	1587	0.31956	2080	0.151652	1352	0.14788	1973	0.0703836	1386	588.692
RPE	1615	1.43544e-07	0.141406	1585	0.28684	1886	0.203114	1816	0.15144	2042	0.0575326	1100	179.827
H3F3B	1616	1.44292e-07	0.157762	1793	0.24754	1620	0.128716	1129	0.15126	2037	0.0948976	1897	11052.2
SRM	1617	1.44436e-07	0.106157	1054	0.18302	1085	0.137196	1216	0.1715	2298	0.157993	2640	953.865
PIAS1	1618	1.45133e-07	0.0592679	338	0.34132	2179	0.174272	1580	0.1513	2039	0.136061	2434	814.038
FLJ11193	1619	1.45186e-07	0.15498	1755	0.29248	1922	0.166402	1501	0.1503	2014	0.0640399	1248	398.596
CD81	1620	1.45598e-07	0.506419	3402	0.23918	1562	0.229997	2002	0.0621	430	0.0420846	662	5148.9
VEZATIN	1621	1.45653e-07	0.112034	1155	0.43966	2582	0.180223	1631	0.12196	1565	0.0672725	1316	261.846
FLJ23790	1622	1.45744e-07	0.0803433	650	0.18448	1094	0.16137	1448	0.16022	2166	0.190181	2856	404.058
UBE3A	1623	1.46429e-07	0.0897337	796	0.22958	1477	0.126329	1107	0.17604	2352	0.159823	2651	716.885
PTPRA	1624	1.46514e-07	0.245776	2655	0.21374	1346	0.220308	1933	0.10578	1289	0.059846	1154	665.096
CHS1	1625	1.46659e-07	0.0303658	38	0.29378	1932	0.256293	2148	0.20474	2653	0.156667	2622	1101.92
FLJ20487	1626	1.46812e-07	0.0616932	369	0.34542	2202	0.316878	2438	0.15688	2115	0.0692998	1361	937.942
CPSF6	1627	1.46914e-07	0.117751	1260	0.30716	2015	0.15112	1346	0.18142	2412	0.0740872	1477	271.923
CIP29	1628	1.47059e-07	0.260522	2746	0.22422	1424	0.128459	1127	0.12966	1695	0.0755818	1509	100.942
SOCS7	1629	1.47312e-07	0.501258	3396	0.17128	976	0.16522	1490	0.09366	1061	0.0554456	1055	443.769
GNPAT	1630	1.47508e-07	0.201627	2280	0.27582	1812	0.298066	2360	0.08514	892	0.052265	960	670.192
MOAP1	1631	1.47737e-07	0.394459	3226	0.20994	1320	0.298232	2361	0.07946	773	0.0376448	549	2124.46
NONO	1632	1.48263e-07	0.110812	1136	0.31698	2065	0.458495	2820	0.08102	807	0.0568203	1083	2989.65
HSRG1	1633	1.48553e-07	0.164606	1862	0.20178	1242	0.180035	1628	0.13366	1764	0.0929426	1867	124.442
THG-1	1634	1.48803e-07	0.22483	2487	0.2636	1744	0.339787	2514	0.08706	926	0.0424425	671	772.712
RBBP9	1635	1.49348e-07	0.190418	2165	0.17106	975	0.114593	986	0.14446	1932	0.138501	2463	180.288
TRIM26	1636	1.49685e-07	0.121052	1300	0.30846	2025	0.215513	1900	0.1274	1657	0.0730094	1450	701.038
GOT2	1637	1.49693e-07	0.314962	3006	0.22892	1472	0.330448	2483	0.05872	378	0.0535042	988	1755.81
CLPTM1	1638	1.50151e-07	0.19049	2166	0.18882	1139	0.12416	1083	0.1562	2107	0.107636	2091	978.442
LRPPRC	1639	1.50449e-07	0.102152	995	0.3126	2048	0.14124	1251	0.15028	2013	0.110997	2133	792.269
AP2B1	1640	1.51287e-07	0.211598	2381	0.23226	1512	0.174844	1583	0.1094	1357	0.080475	1607	1627.81
TOLLIP	1641	1.51415e-07	0.150727	1696	0.24256	1585	0.190048	1712	0.12054	1537	0.0904023	1821	715.25
SPPL2A	1642	1.51734e-07	0.0558785	284	0.2797	1845	0.285069	2309	0.14812	1976	0.114974	2176	598.212
ARIH2	1643	1.52011e-07	0.0470001	160	0.32882	2125	0.261016	2180	0.1509	2031	0.124876	2304	1057.38
RAB28	1644	1.52359e-07	0.192328	2183	0.27294	1796	0.176306	1602	0.1243	1604	0.0662272	1293	103.038
WHSC2	1645	1.52446e-07	0.153249	1732	0.22702	1450	0.268918	2222	0.09086	993	0.0896761	1816	372.096
FLJ20232	1646	1.52576e-07	0.076436	575	0.69264	3091	0.473769	2862	0.0777	716	0.0391479	584	1170.85
UBE2M	1647	1.53556e-07	0.285983	2886	0.1885	1136	0.168871	1534	0.11852	1514	0.071168	1406	928.769
LIR9	1648	1.53644e-07	0.133102	1468	0.14308	720	0.151548	1351	0.16344	2203	0.162876	2668	292.038
FLJ20249	1649	1.53692e-07	0.0211264	5	0.42878	2539	0.374839	2628	0.1682	2255	0.134567	2418	673.385
MGAT1	1650	1.54694e-07	0.221513	2465	0.35952	2266	0.321505	2454	0.13532	1791	0.0223263	191	559.019
YT521	1651	1.55005e-07	0.191278	2171	0.21252	1338	0.108513	898	0.15696	2117	0.11195	2143	888.038
LTBP2	1652	1.55029e-07	0.169362	1919	0.21662	1368	0.154259	1383	0.10202	1217	0.13427	2413	796.115
POT1	1653	1.55055e-07	0.103811	1018	0.19322	1173	0.152197	1362	0.16922	2273	0.150089	2559	355.096
DLD	1654	1.55574e-07	0.0802192	648	0.3149	2056	0.194832	1748	0.14838	1980	0.106528	2068	668.442
GC20	1655	1.55851e-07	0.245453	2653	0.14834	752	0.138808	1230	0.13226	1736	0.116589	2208	2287.04
SRPR	1656	1.56253e-07	0.453522	3331	0.2288	1471	0.24361	2083	0.07202	615	0.0429181	689	979.462
DELGEF	1657	1.56428e-07	0.311666	2985	0.29466	1941	0.463292	2834	0.05762	347	0.0319075	414	157.865
MGC2963	1658	1.56508e-07	0.141928	1590	0.31826	2073	0.403233	2709	0.07792	729	0.0551439	1044	967.423
TPP2	1659	1.56627e-07	0.531584	3416	0.2007	1231	0.118577	1031	0.10572	1288	0.0585605	1127	646.692
HADHB	1660	1.56943e-07	0.134369	1482	0.18264	1079	0.13998	1241	0.13878	1843	0.164615	2680	2070.27
COPZ1	1661	1.57447e-07	0.0888637	782	0.32254	2093	0.274306	2258	0.12902	1682	0.0776158	1549	952.231
MGC26979	1662	1.5774e-07	0.122494	1324	0.35302	2234	0.395195	2687	0.08524	894	0.054149	1016	696.077
TWSG1	1663	1.57872e-07	0.410503	3262	0.24848	1625	0.117618	1020	0.11452	1460	0.0574589	1098	23.7692
SH3GLB2	1664	1.58072e-07	0.327398	3053	0.21784	1379	0.281278	2293	0.07912	767	0.0498008	901	566.154
G10	1665	1.5817e-07	0.237554	2591	0.20864	1303	0.121409	1054	0.11928	1522	0.110195	2119	737.5
SVH	1666	1.58304e-07	0.08204	683	0.28814	1891	0.242256	2074	0.13666	1808	0.101149	1997	985.173
RNF11	1667	1.58503e-07	0.253613	2701	0.1701	966	0.112605	962	0.1333	1755	0.122402	2273	2028.19
SWAP70	1668	1.58884e-07	0.0774541	593	0.30036	1964	0.157629	1415	0.22316	2793	0.0970855	1939	240.346
GTF2H1	1669	1.58989e-07	0.12239	1322	0.39312	2412	0.260668	2176	0.09912	1172	0.0639532	1246	528.212
ACTR1A	1670	1.60591e-07	0.108996	1112	0.26942	1771	0.270502	2231	0.12284	1574	0.0822972	1655	1461.4
GORASP2	1671	1.60998e-07	0.101582	989	0.25872	1705	0.157494	1414	0.15632	2109	0.124426	2298	1269.81
FLJ12903	1672	1.61037e-07	0.257435	2723	0.20566	1274	0.217224	1914	0.09822	1152	0.071288	1410	369.423
NAB1	1673	1.61447e-07	0.0245926	12	0.32514	2105	0.252582	2124	0.19584	2567	0.204112	2932	658.692
NDUFB5	1674	1.61478e-07	0.117894	1262	0.15554	824	0.22408	1962	0.11336	1434	0.173353	2745	1436.15
TALDO1	1675	1.61892e-07	0.159106	1810	0.24016	1573	0.222612	1954	0.11688	1495	0.0814264	1632	1288.1
HSPA8	1676	1.62184e-07	0.172786	1968	0.26276	1735	0.24481	2087	0.14948	1997	0.0488139	860	6069.85
UROD	1677	1.6233e-07	0.236895	2585	0.23864	1558	0.154747	1389	0.1117	1408	0.0830689	1677	1118.04
PPP6C	1678	1.62566e-07	0.228179	2515	0.33428	2150	0.214831	1896	0.103	1239	0.0481643	843	660.442
DNAJB2	1679	1.6326e-07	0.263674	2765	0.21858	1386	0.111187	946	0.1252	1621	0.101756	2006	782.788
AP1M1	1680	1.63325e-07	0.107995	1089	0.30082	1969	0.289814	2332	0.11134	1397	0.0779091	1554	473.154
TCF3	1681	1.64027e-07	0.108524	1097	0.39292	2411	0.60057	3064	0.0803	791	0.039886	596	965.75
FLJ10330	1682	1.64115e-07	0.303795	2950	0.2494	1634	0.332409	2493	0.0775	714	0.0420447	659	137.077
KLF2	1683	1.6468e-07	0.471434	3369	0.1715	979	0.0754002	511	0.12682	1646	0.106515	2067	850.788
FBXL4	1684	1.64808e-07	0.281105	2860	0.18028	1048	0.179	1624	0.10298	1238	0.0882208	1787	74.2308
BDG29	1685	1.65829e-07	0.336577	3076	0.181	1059	0.205586	1829	0.10622	1295	0.0623322	1213	667.712
SDOS	1686	1.65917e-07	0.271386	2807	0.14404	728	0.110997	942	0.13382	1768	0.142891	2508	921.019
SFPQ	1687	1.66092e-07	0.0834689	705	0.31332	2051	0.14307	1272	0.18782	2491	0.118184	2230	755.75
NDUFS5	1688	1.67127e-07	0.158911	1806	0.20192	1244	0.175467	1593	0.11238	1420	0.132082	2394	3443.92
BLCAP	1689	1.67585e-07	0.17966	2048	0.16712	930	0.136564	1205	0.13162	1725	0.155279	2606	2568.5
FLJ22490	1690	1.68425e-07	0.0642335	394	0.36056	2270	0.33245	2494	0.13852	1836	0.0789664	1576	646.942
MAP2K4	1691	1.68748e-07	0.228891	2522	0.27588	1813	0.163737	1469	0.14562	1946	0.0560451	1064	936.173
ARPC3	1692	1.69356e-07	0.0849012	717	0.29182	1918	0.113081	968	0.19478	2555	0.155185	2604	585.135
FLJ33979	1693	1.69869e-07	0.354661	3125	0.22934	1476	0.203733	1819	0.09516	1086	0.0538669	1003	46.6346
KIF5B	1694	1.70054e-07	0.170589	1935	0.33122	2134	0.350903	2555	0.0957	1096	0.0448163	742	1478.25
HNRPM	1695	1.70082e-07	0.0718597	515	0.35992	2268	0.274047	2256	0.1338	1767	0.0896816	1817	1075.46
MGC9084	1696	1.70456e-07	0.0601548	349	0.18276	1081	0.201651	1805	0.1758	2350	0.218703	2994	333.423
USP6	1697	1.70606e-07	0.198408	2256	0.2881	1890	0.335755	2502	0.09206	1025	0.048285	846	1024.79
TRIM45	1698	1.70863e-07	0.0583071	320	0.505	2772	0.865753	3287	0.0756	676	0.0443338	727	432.481
ZHX2	1699	1.70992e-07	0.347577	3105	0.26788	1764	0.158226	1422	0.1156	1473	0.050207	905	249.538
BID	1700	1.71122e-07	0.369825	3166	0.21358	1345	0.11671	1010	0.13662	1806	0.0679425	1337	492.442
HRIHFB2122	1701	1.71184e-07	0.214208	2400	0.23578	1535	0.189266	1707	0.12088	1544	0.0740812	1476	1021.25
HSPC182	1702	1.71456e-07	0.172577	1964	0.21704	1370	0.167843	1520	0.13882	1844	0.0982405	1953	1433.92
PHKA2	1703	1.71494e-07	0.100993	977	0.27638	1815	0.230665	2008	0.15708	2118	0.0847936	1715	550.635
EIF3S1	1704	1.71501e-07	0.133788	1474	0.22588	1440	0.120265	1048	0.15102	2033	0.156247	2617	552.269
PUM2	1705	1.71556e-07	0.0845778	711	0.17886	1039	0.171137	1558	0.15762	2126	0.210231	2955	1683.15
PTBP1	1706	1.71716e-07	0.236524	2582	0.25134	1647	0.0876004	672	0.18342	2436	0.0898949	1819	850.827
ZNF277	1707	1.71746e-07	0.198195	2255	0.20626	1279	0.118261	1027	0.17362	2325	0.102318	2013	467.673
NR2F6	1708	1.71845e-07	0.407577	3258	0.1837	1089	0.0938693	736	0.12804	1667	0.0954912	1908	633.654
SEC13L	1709	1.71986e-07	0.200863	2274	0.20262	1251	0.0886168	682	0.17874	2384	0.13341	2404	514.135
UGCGL1	1710	1.72304e-07	0.103108	1008	0.31258	2047	0.220725	1934	0.15762	2127	0.0768415	1534	217.692
ATP6AP1	1711	1.72633e-07	0.137559	1532	0.41954	2513	0.464637	2840	0.07694	704	0.0418419	655	2394.46
SGPL1	1712	1.7294e-07	0.0503325	207	0.51104	2785	0.207798	1850	0.18304	2432	0.0883938	1792	549.981
PRPF18	1713	1.73023e-07	0.0704302	495	0.29834	1956	0.16821	1524	0.18364	2438	0.1333	2402	417.596
KPNA3	1714	1.73026e-07	0.111898	1153	0.35214	2229	0.0907945	703	0.15958	2155	0.151548	2565	799.25
GTF2E2	1715	1.73046e-07	0.222254	2472	0.23122	1500	0.104808	853	0.14918	1991	0.107696	2094	384.058
MAP2K2	1716	1.73134e-07	0.234138	2561	0.22422	1423	0.256696	2151	0.0793	770	0.0810136	1616	1284.65
KIAA0196	1717	1.73215e-07	0.117635	1253	0.2944	1936	0.237404	2046	0.1286	1676	0.0819215	1644	323.481
UBR1	1718	1.73469e-07	0.0606477	359	0.30816	2022	0.24807	2104	0.14922	1993	0.125385	2309	671.885
ETF1	1719	1.74433e-07	0.11871	1273	0.2798	1847	0.144805	1286	0.15646	2111	0.11591	2196	794.673
CAP1	1720	1.75044e-07	0.116759	1229	0.18078	1054	0.142108	1259	0.17424	2330	0.167478	2703	1839.69
YWHAQ	1721	1.75093e-07	0.186658	2128	0.15316	794	0.129021	1134	0.1522	2049	0.155961	2614	4288.62
FLJ11342	1722	1.75296e-07	0.0635908	383	0.36354	2286	0.162591	1457	0.1691	2272	0.137912	2453	1415.23
AGA	1723	1.76604e-07	0.117119	1239	0.31602	2061	0.111067	943	0.16696	2241	0.128669	2363	396.5
PIGF	1724	1.76992e-07	0.121474	1307	0.2545	1673	0.168842	1532	0.1766	2360	0.0960126	1919	858.788
PEX14	1725	1.77169e-07	0.276358	2834	0.17552	1012	0.261003	2179	0.08332	849	0.0839867	1694	466.173
FIBP	1726	1.77597e-07	0.161864	1835	0.27754	1827	0.201653	1806	0.12926	1686	0.0758414	1514	1615.29
MGC12966	1727	1.78015e-07	0.192533	2187	0.2262	1445	0.260477	2175	0.12096	1545	0.0648726	1264	1286.88
NME4	1728	1.7977e-07	0.462287	3353	0.2384	1557	0.0994132	795	0.11076	1389	0.0740778	1475	975.231
MGC39325	1729	1.80296e-07	0.364946	3150	0.27436	1799	0.0469517	219	0.1858	2456	0.103218	2022	285.404
SSB3	1730	1.80804e-07	0.246883	2663	0.17606	1018	0.135355	1195	0.13284	1747	0.115683	2190	2429.87
PURA	1731	1.81051e-07	0.347501	3104	0.20774	1292	0.120403	1049	0.14044	1865	0.0741673	1479	1448.77
NR3C2	1732	1.81182e-07	0.259518	2740	0.27542	1810	0.113562	974	0.12302	1581	0.0907312	1828	334.538
HOXA7	1733	1.81457e-07	0.0776228	596	0.19278	1169	0.151922	1359	0.1973	2582	0.202297	2924	391.5
DNAJC4	1734	1.81742e-07	0.207825	2337	0.2382	1555	0.235263	2030	0.09248	1038	0.0843781	1704	723.596
C6.1A	1735	1.81887e-07	0.0905593	808	0.41982	2516	0.345908	2537	0.1007	1193	0.0686802	1352	296.212
FLJ10652	1736	1.82686e-07	0.0518769	235	0.34218	2185	0.0998127	800	0.24846	2924	0.207515	2946	449.038
RNF13	1737	1.82708e-07	0.157053	1782	0.33124	2135	0.085136	639	0.1668	2238	0.123673	2291	1685.94
MRPL44	1738	1.83111e-07	0.0827089	695	0.30934	2027	0.140507	1246	0.21758	2754	0.117064	2212	315.442
PANK4	1739	1.83517e-07	0.115092	1198	0.39314	2413	0.433776	2775	0.10078	1194	0.0463937	789	517.096
SPRED2	1740	1.84091e-07	0.154898	1754	0.41442	2499	0.46741	2849	0.10226	1221	0.0300025	361	530.942
LOC283687	1741	1.84546e-07	0.148164	1665	0.1992	1221	0.181584	1648	0.10892	1345	0.158089	2642	478
MGC13186	1742	1.84876e-07	0.290135	2904	0.23458	1525	0.153047	1371	0.10972	1367	0.0808895	1615	408.788
PPFIBP1	1743	1.85041e-07	0.0989732	946	0.28106	1853	0.208339	1857	0.1728	2318	0.0923961	1859	981.308
NDUFC2	1744	1.85077e-07	0.279611	2848	0.18726	1120	0.180882	1637	0.10144	1206	0.0963304	1928	3075.88
STX8	1745	1.85541e-07	0.0936236	853	0.33176	2139	0.235524	2032	0.1298	1697	0.0977094	1947	1211.46
BRI3	1746	1.8643e-07	0.433876	3306	0.1337	645	0.109125	912	0.13338	1758	0.110412	2123	1649.81
TRIM35	1747	1.86435e-07	0.227122	2508	0.21046	1327	0.214758	1895	0.09832	1156	0.0923685	1857	225.731
LRP6	1748	1.86527e-07	0.0649481	402	0.25086	1643	0.247746	2102	0.15908	2150	0.145257	2528	400.769
ARF1	1749	1.86768e-07	0.252716	2695	0.15102	772	0.157345	1413	0.1262	1639	0.123236	2281	3472.46
PAFAH1B2	1750	1.87566e-07	0.187446	2142	0.20662	1284	0.130419	1154	0.16868	2262	0.110082	2118	375.308
NGFRAP1	1751	1.88118e-07	0.186004	2120	0.36984	2330	0.516606	2934	0.06418	474	0.0412429	636	10687.8
CDH2	1752	1.89515e-07	0.106947	1072	0.28724	1887	0.176047	1596	0.15588	2103	0.112416	2145	684.192
RERE	1753	1.89741e-07	0.0594975	340	0.27104	1781	0.265909	2210	0.15836	2135	0.139722	2480	1846.38
MGC15407	1754	1.89896e-07	0.19513	2221	0.2837	1867	0.164508	1480	0.13968	1855	0.0746498	1494	642.75
SNAP29	1755	1.90003e-07	0.447257	3325	0.22724	1451	0.186754	1691	0.07836	742	0.0638806	1242	487.731
BAP1	1756	1.90897e-07	0.138403	1550	0.28606	1881	0.247414	2100	0.12284	1573	0.0793319	1585	1048.87
GOLPH3	1757	1.90977e-07	0.120204	1290	0.41288	2490	0.460643	2827	0.10216	1219	0.0408892	622	656.923
HADHA	1758	1.9106e-07	0.0825898	692	0.20724	1290	0.178295	1619	0.1968	2579	0.159082	2647	830.712
PAPOLA	1759	1.92668e-07	0.105505	1044	0.31172	2040	0.10258	828	0.21862	2762	0.130628	2378	937.885
MRPL3	1760	1.93619e-07	0.10453	1034	0.2951	1946	0.287781	2317	0.11374	1443	0.0958909	1916	958.538
PHAX	1761	1.94274e-07	0.179788	2054	0.32568	2107	0.114259	982	0.15366	2069	0.0944988	1890	9042.48
GRIM19	1762	1.94328e-07	0.473628	3373	0.22748	1453	0.159249	1427	0.09878	1164	0.0573357	1094	3426.77
RAB9A	1763	1.94845e-07	0.153228	1731	0.36618	2310	0.455589	2816	0.08194	830	0.0465161	791	455.519
GNAI3	1764	1.9489e-07	0.142904	1604	0.18246	1076	0.12199	1062	0.18674	2471	0.164071	2675	707.058
PFN1	1765	1.94891e-07	0.545295	3430	0.21964	1394	0.137079	1214	0.10044	1189	0.0591	1139	1922.29
DDX48	1766	1.94952e-07	0.116145	1217	0.36394	2287	0.302718	2381	0.08776	944	0.0868118	1757	1521.17
BACH2	1767	1.9531e-07	0.460978	3349	0.1335	642	0.152501	1367	0.10054	1191	0.103506	2027	333.827
APG3	1768	1.95735e-07	0.253094	2698	0.29082	1913	0.260302	2172	0.08148	815	0.0626973	1220	654.827
FLJ10769	1769	1.9582e-07	0.131683	1453	0.28244	1860	0.306441	2398	0.10308	1244	0.083348	1684	1074.1
SIP	1770	1.9614e-07	0.108248	1093	0.26122	1728	0.187859	1698	0.1688	2266	0.109383	2110	1697.94
RBM6	1771	1.96422e-07	0.21287	2391	0.2557	1684	0.0933976	722	0.20888	2679	0.0924969	1863	728.058
CSNK1A1	1772	1.96624e-07	0.124487	1354	0.26546	1751	0.164648	1482	0.15542	2095	0.11627	2201	1808.44
ABCC5	1773	1.96625e-07	0.0634754	381	0.277	1822	0.181725	1652	0.1953	2560	0.157562	2632	1587.35
PDCD2	1774	1.97914e-07	0.0348467	59	0.72332	3116	0.545327	2983	0.132	1732	0.0545467	1027	362.942
RPS8	1775	1.98367e-07	0.268184	2788	0.25642	1692	0.211749	1872	0.10064	1192	0.0676873	1330	3117.48
CAMKK2	1776	1.98559e-07	0.379149	3198	0.22788	1456	0.132455	1169	0.1507	2026	0.0575713	1101	2804.04
FUCA2	1777	1.98977e-07	0.181346	2067	0.24364	1596	0.112824	964	0.1303	1702	0.153185	2583	466.981
MGC29937	1778	1.99309e-07	0.308123	2970	0.27686	1820	0.220782	1935	0.09852	1160	0.0537117	1000	90
MARK3	1779	1.99354e-07	0.0371547	70	0.3796	2365	0.518297	2938	0.13912	1848	0.0980236	1951	684.154
CDA08	1780	1.99592e-07	0.208769	2344	0.20986	1319	0.109111	909	0.15394	2073	0.135626	2429	946.942
FLJ10074	1781	1.99816e-07	0.0350191	61	0.4022	2446	0.498824	2904	0.15576	2099	0.0913051	1841	360.481
NDUFS1	1782	2.01246e-07	0.0921466	832	0.25396	1670	0.162537	1455	0.18796	2493	0.14076	2491	496.75
TBC1D8	1783	2.02284e-07	0.0693668	475	0.25204	1653	0.194943	1751	0.15158	2043	0.195797	2892	902
ROD1	1784	2.02425e-07	0.115249	1200	0.32456	2102	0.133253	1174	0.1897	2512	0.107054	2081	450.923
PRKCN	1785	2.02959e-07	0.182696	2081	0.21046	1326	0.0885312	681	0.2196	2771	0.135767	2431	219.481
ZNF281	1786	2.03201e-07	0.13088	1444	0.35638	2255	0.225581	1974	0.15906	2149	0.0607145	1173	249.712
UBE2G2	1787	2.03626e-07	0.0900115	799	0.29576	1951	0.187772	1695	0.1583	2134	0.128677	2364	580.75
KIAA1196	1788	2.04358e-07	0.188916	2152	0.25528	1680	0.161231	1442	0.13926	1850	0.0943723	1888	397.096
MRPL46	1789	2.04614e-07	0.131575	1451	0.30016	1963	0.320449	2449	0.10086	1196	0.0801577	1602	651.846
MGC21688	1790	2.04673e-07	0.260314	2744	0.2093	1309	0.255175	2139	0.09616	1101	0.0765557	1527	1227.48
SHMT1	1791	2.04921e-07	0.856081	3544	0.24308	1591	0.0984972	786	0.09236	1032	0.054129	1015	347.827
TSC2	1792	2.05063e-07	0.117117	1238	0.27224	1790	0.254763	2137	0.15284	2059	0.0825957	1663	403.942
MFN1	1793	2.05135e-07	0.0562964	290	0.3871	2393	0.29219	2341	0.17474	2338	0.0921924	1851	413.288
STK24	1794	2.06305e-07	0.102996	1006	0.37252	2336	0.563388	3005	0.09872	1163	0.0483437	847	2303.13
HBP1	1795	2.06499e-07	0.113256	1176	0.20752	1291	0.279248	2281	0.12354	1592	0.127354	2340	607.442
FLJ20277	1796	2.06579e-07	0.24754	2667	0.23214	1511	0.164836	1484	0.13736	1816	0.0793953	1590	698.808
TOP1	1797	2.07248e-07	0.17057	1934	0.24636	1612	0.0820467	591	0.25714	2974	0.116896	2210	438.308
GRIK2	1798	2.07628e-07	0.39146	3221	0.1488	757	0.177069	1609	0.10886	1343	0.0924699	1862	328.808
FMR1	1799	2.07895e-07	0.212862	2390	0.21574	1359	0.197016	1770	0.11542	1470	0.0995514	1971	599.192
NAPA	1800	2.08646e-07	0.192613	2188	0.2946	1940	0.459332	2823	0.07908	764	0.0506191	921	1350.15
TAZ	1801	2.08779e-07	0.0690423	470	0.42996	2543	0.372237	2619	0.19896	2601	0.0474869	827	871.808
BBX	1802	2.08877e-07	0.207489	2333	0.26968	1773	0.111895	955	0.16276	2196	0.102495	2015	1173.94
TOMM70A	1803	2.09468e-07	0.171864	1951	0.2797	1846	0.167054	1507	0.1304	1703	0.100028	1978	1607.02
CYB5-M	1804	2.0972e-07	0.0975317	922	0.32368	2097	0.2624	2189	0.14624	1955	0.0865691	1752	498.865
FLJ90396	1805	2.09744e-07	0.177214	2014	0.20722	1289	0.109722	917	0.19782	2587	0.131586	2389	177.615
FTS	1806	2.10261e-07	0.312176	2986	0.18998	1150	0.132952	1173	0.13452	1779	0.0991256	1965	484.019
BCL2	1807	2.10288e-07	0.103048	1007	0.20124	1234	0.139914	1240	0.21168	2708	0.171212	2724	446.308
SNTB1	1808	2.11462e-07	0.183139	2087	0.163	896	0.149906	1330	0.13624	1802	0.173443	2748	245.981
CGI-125	1809	2.12217e-07	0.117256	1242	0.4306	2545	0.385886	2660	0.13072	1710	0.0416664	652	540.462
CARF	1810	2.12487e-07	0.0971144	912	0.31904	2075	0.221358	1937	0.14834	1979	0.10444	2037	245.712
EPB41L1	1811	2.14353e-07	0.360011	3140	0.24878	1628	0.135033	1193	0.11264	1424	0.078683	1569	1654.88
MRPL19	1812	2.14377e-07	0.18202	2076	0.30362	1987	0.182506	1659	0.1486	1982	0.071523	1418	92.5385
CX3CL1	1813	2.1467e-07	0.198077	2252	0.18448	1095	0.117074	1012	0.17512	2342	0.143286	2515	898.038
ARPC5	1814	2.15516e-07	0.150446	1689	0.26356	1739	0.167316	1512	0.16572	2223	0.0980214	1950	1256.69
USP8	1815	2.15549e-07	0.173451	1975	0.27302	1797	0.14846	1322	0.12116	1547	0.126538	2330	237.346
MDH2	1816	2.16141e-07	0.477035	3377	0.20828	1297	0.176401	1603	0.10316	1246	0.0597779	1153	2687.17
KIAA0101	1817	2.16545e-07	0.058208	319	0.3656	2302	0.574876	3022	0.13692	1810	0.064645	1261	451.327
LOC51321	1818	2.16791e-07	0.221149	2460	0.36928	2326	0.310778	2416	0.09642	1107	0.0442996	723	1685.6
GLUD1	1819	2.17114e-07	0.217879	2431	0.26032	1719	0.14523	1291	0.14174	1892	0.0929889	1870	1812.29
SH2BP1	1820	2.17238e-07	0.109481	1119	0.34068	2174	0.350592	2553	0.15022	2012	0.0553013	1050	542.231
THAP7	1821	2.17804e-07	0.23174	2545	0.24872	1626	0.271095	2235	0.09386	1066	0.0742622	1482	516.769
GNG7	1822	2.18154e-07	0.154097	1743	0.30598	2005	0.343849	2529	0.13436	1777	0.0500789	904	378.212
MAD2L1	1823	2.18156e-07	0.253191	2699	0.21744	1374	0.181836	1653	0.10782	1331	0.101069	1996	157.423
APPL	1824	2.18732e-07	0.230662	2536	0.27206	1789	0.28131	2294	0.11164	1406	0.0554985	1056	227.654
FXR1	1825	2.19145e-07	0.487988	3386	0.28276	1863	0.068442	435	0.1417	1890	0.0818894	1643	985.192
GDI1	1826	2.19414e-07	0.266202	2782	0.29798	1955	0.357127	2580	0.07022	582	0.0551564	1045	4688.54
ATP6V0D1	1827	2.20618e-07	0.20333	2296	0.2336	1521	0.209738	1864	0.1305	1705	0.0848582	1718	2730.13
LOC126731	1828	2.20803e-07	0.0742207	550	0.18624	1112	0.232785	2018	0.15884	2143	0.216027	2987	284.635
MLP	1829	2.20929e-07	0.301918	2945	0.33142	2136	0.195557	1757	0.11144	1401	0.0506624	922	4977.98
LAMA2	1830	2.21469e-07	0.237641	2592	0.23056	1490	0.173541	1572	0.15766	2129	0.0738752	1466	337.135
FLJ20280	1831	2.21609e-07	0.0604252	354	0.52222	2809	0.432509	2772	0.1505	2019	0.053951	1007	511.212
EHD4	1832	2.2163e-07	0.241478	2629	0.2453	1607	0.11754	1019	0.17576	2348	0.0905652	1824	477.962
VAMP4	1833	2.21785e-07	0.089489	791	0.20276	1252	0.207557	1846	0.15754	2124	0.186925	2835	684.904
DSCR2	1834	2.23019e-07	0.393654	3224	0.18392	1090	0.0853726	643	0.1797	2391	0.100403	1983	960.692
ZNF195	1835	2.23115e-07	0.155069	1757	0.2327	1516	0.172315	1564	0.16522	2219	0.108601	2103	299.442
RAB1A	1836	2.24075e-07	0.199056	2259	0.23598	1538	0.131753	1165	0.13576	1800	0.13336	2403	2432.1
KIAA1043	1837	2.24263e-07	0.266082	2781	0.26094	1724	0.180929	1639	0.10754	1325	0.0830117	1675	270.538
ABHD5	1838	2.24275e-07	0.111876	1152	0.29024	1908	0.176252	1601	0.15614	2106	0.125503	2310	542.538
GNG5	1839	2.25343e-07	0.655889	3493	0.13132	616	0.0935748	727	0.13472	1783	0.103779	2029	1981.6
NUP37	1840	2.25809e-07	0.0815465	675	0.30276	1979	0.280616	2291	0.182	2418	0.0895507	1814	389.673
FLJ38973	1841	2.26488e-07	0.15058	1692	0.43214	2551	0.252814	2125	0.11822	1510	0.0582339	1119	341.269
SRP54	1842	2.26521e-07	0.201954	2282	0.24812	1622	0.159728	1429	0.14698	1964	0.0962879	1925	415.577
CDC2L5	1843	2.26582e-07	0.0701143	488	0.35056	2221	0.239521	2058	0.20978	2690	0.0917413	1847	702.942
RAB21	1844	2.26689e-07	0.0587817	330	0.38182	2377	0.241226	2071	0.18358	2437	0.11405	2170	595.596
ZFYVE21	1845	2.26706e-07	0.180554	2060	0.21336	1344	0.140383	1244	0.15022	2011	0.139545	2477	424.365
RHEB	1846	2.26869e-07	0.135718	1503	0.22694	1449	0.154269	1385	0.16182	2180	0.147547	2540	2644.65
FLJ10521	1847	2.27417e-07	0.294477	2923	0.16994	963	0.163937	1471	0.11682	1494	0.118659	2233	577.423
EIF2C3	1848	2.28458e-07	0.06576	417	0.38756	2395	0.516638	2935	0.12478	1611	0.0695328	1367	377.596
TEGT	1849	2.28855e-07	0.158316	1798	0.25904	1711	0.137387	1219	0.17218	2312	0.117966	2227	4373.63
SEC61A2	1850	2.28917e-07	0.0870613	755	0.48322	2717	0.35863	2584	0.1166	1491	0.0650695	1272	491.827
SFRS12	1851	2.29533e-07	0.117666	1256	0.26978	1774	0.188675	1703	0.1531	2061	0.125173	2307	544.038
FLJ10904	1852	2.29683e-07	0.336656	3078	0.25192	1651	0.133734	1179	0.15578	2100	0.065004	1269	121.923
NANS	1853	2.30087e-07	0.104037	1026	0.23474	1526	0.239961	2061	0.15522	2092	0.126487	2328	420.846
GTL3	1854	2.30555e-07	0.134154	1478	0.2205	1399	0.192371	1728	0.14584	1948	0.138919	2468	961.538
FLJ21174	1855	2.32876e-07	0.202883	2290	0.3536	2236	0.515951	2931	0.0825	838	0.0381348	557	972.096
SLC17A5	1856	2.33111e-07	0.0542511	256	0.40624	2462	0.318915	2443	0.14058	1872	0.117975	2228	806.115
MMP9	1857	2.33349e-07	0.0819806	682	0.25566	1683	0.180344	1632	0.17804	2376	0.173391	2747	688.154
KIAA0073	1858	2.33649e-07	0.182099	2077	0.28094	1851	0.146048	1304	0.1626	2192	0.0961708	1922	231.865
MGC33365	1859	2.34405e-07	0.2179	2432	0.30128	1971	0.143384	1278	0.16932	2275	0.0735437	1462	25.75
SNTB2	1860	2.34901e-07	0.179361	2043	0.36092	2273	0.232233	2013	0.1488	1984	0.0525091	965	520.269
SAP130	1861	2.35557e-07	0.221814	2468	0.33384	2146	0.455766	2818	0.0719	609	0.0485417	851	1011.67
HUMAUANTIG	1862	2.35972e-07	0.218045	2433	0.28522	1876	0.145829	1301	0.14244	1902	0.0913426	1842	166.75
NUTF2	1863	2.36248e-07	0.182678	2080	0.28274	1862	0.201176	1801	0.15742	2120	0.0722225	1435	1112.65
IL13RA1	1864	2.36286e-07	0.120927	1297	0.36758	2315	0.0598309	331	0.34236	3247	0.129769	2373	399.731
ARHGEF12	1865	2.36604e-07	0.216952	2419	0.18728	1121	0.169423	1539	0.12392	1597	0.138698	2467	949.712
LARS2	1866	2.36643e-07	0.10702	1073	0.26678	1756	0.165771	1496	0.169	2271	0.147943	2541	513.519
ARFGEF2	1867	2.3676e-07	0.152538	1723	0.19884	1216	0.171925	1563	0.16264	2194	0.139597	2478	559.981
IDH3G	1868	2.36779e-07	0.213481	2395	0.40984	2478	0.187856	1697	0.1091	1350	0.0660293	1288	1033.56
MTA1	1869	2.36815e-07	0.159826	1814	0.2714	1782	0.228514	1994	0.12674	1645	0.0942628	1886	725.442
APC	1870	2.37647e-07	0.373852	3180	0.31764	2066	0.320836	2451	0.09034	988	0.0345263	471	522.577
PNN	1871	2.38267e-07	0.158393	1799	0.29598	1952	0.141987	1258	0.18936	2509	0.0945244	1891	493.058
VPS26	1872	2.38877e-07	0.114284	1188	0.20062	1230	0.167301	1511	0.1652	2218	0.188503	2849	1044.9
CRLF3	1873	2.39488e-07	0.0814229	672	0.4262	2530	0.207686	1849	0.18322	2435	0.0906901	1827	548.827
DDX1	1874	2.40326e-07	0.164888	1866	0.15658	834	0.161887	1453	0.1508	2028	0.190668	2859	1040.65
CALU	1875	2.40454e-07	0.0571472	302	0.275	1804	0.210866	1870	0.20314	2641	0.178615	2778	650.212
NUP214	1876	2.40556e-07	0.184777	2107	0.26092	1723	0.229292	1999	0.11832	1512	0.0919662	1848	1070.04
HBXIP	1877	2.41223e-07	0.293996	2919	0.31214	2042	0.129797	1146	0.11148	1402	0.0908411	1832	1860.42
LOC91137	1878	2.4182e-07	0.0598019	345	0.4198	2515	0.230991	2009	0.18476	2448	0.112862	2153	586.25
EPB41L5	1879	2.4243e-07	0.0941609	863	0.32608	2113	0.200326	1797	0.1859	2461	0.106021	2057	362.192
SAP18	1880	2.42615e-07	0.179191	2039	0.41066	2481	0.156347	1405	0.1133	1432	0.0930711	1872	2353.6
MGC2714	1881	2.42873e-07	0.330682	3062	0.1983	1214	0.151726	1355	0.12622	1640	0.0967102	1936	338.788
PAFAH1B1	1882	2.43645e-07	0.183073	2085	0.29476	1943	0.104119	843	0.19732	2583	0.109896	2116	2166.83
MGC2744	1883	2.44647e-07	0.152369	1719	0.42612	2529	0.634947	3100	0.07752	715	0.0382803	562	666.192
HMGN1	1884	2.45092e-07	0.197078	2243	0.2268	1448	0.134493	1186	0.1624	2188	0.125539	2312	1250.23
SFRS2	1885	2.45202e-07	0.152316	1717	0.19886	1217	0.195685	1760	0.16462	2212	0.125662	2314	2514.46
KIAA0247	1886	2.45309e-07	0.355722	3128	0.22776	1455	0.253489	2130	0.09228	1030	0.0647254	1263	548.962
LMAN1	1887	2.45567e-07	0.134906	1493	0.23604	1539	0.288823	2325	0.09668	1114	0.138102	2458	92.4038
RFXAP	1888	2.46782e-07	0.252035	2692	0.15714	844	0.134955	1191	0.16896	2270	0.13665	2440	108.788
CGI-12	1889	2.46815e-07	0.176362	2004	0.26356	1740	0.115861	1004	0.17792	2375	0.128808	2365	250.058
PCBP1	1890	2.46905e-07	0.102307	997	0.23238	1514	0.252941	2126	0.16852	2260	0.121834	2265	3787.9
SLC30A6	1891	2.47362e-07	0.390301	3218	0.13088	609	0.141626	1253	0.11538	1469	0.148184	2543	97.0769
ENTPD6	1892	2.47628e-07	0.296867	2932	0.41224	2487	0.298015	2359	0.08152	818	0.0416486	650	791.865
ZNF198	1893	2.47858e-07	0.177259	2016	0.22138	1407	0.115791	1003	0.18248	2424	0.14948	2554	507.962
DEK	1894	2.47964e-07	0.353201	3119	0.23824	1556	0.10634	873	0.1502	2009	0.0922578	1854	421.423
TNRC6	1895	2.48481e-07	0.142024	1591	0.3128	2049	0.146643	1309	0.18226	2421	0.104647	2041	680.673
NDUFB2	1896	2.48795e-07	0.322082	3035	0.40594	2461	0.483619	2877	0.06218	431	0.0316428	405	5651.81
FLJ10099	1897	2.49759e-07	0.226714	2505	0.32058	2087	0.326312	2473	0.0975	1141	0.0540113	1010	740.962
ERCC1	1898	2.50491e-07	0.298598	2936	0.47182	2686	0.307112	2400	0.07716	710	0.0375193	544	840.615
SSFA2	1899	2.50526e-07	0.0445746	133	0.4414	2590	0.320645	2450	0.17894	2385	0.110973	2132	1168.96
PMSCL2	1900	2.50866e-07	0.195204	2222	0.2789	1838	0.294634	2349	0.11024	1380	0.0709409	1399	267.981
COPS6	1901	2.51443e-07	0.047457	164	1.03974	3325	0.561324	3001	0.09728	1135	0.0466651	795	1708.38
MTCH2	1902	2.51695e-07	0.35834	3134	0.22808	1457	0.169648	1542	0.12708	1649	0.0714302	1414	1327.83
RPS4X	1903	2.51781e-07	0.0976112	923	0.3621	2280	0.646521	3116	0.07712	709	0.0714431	1415	11155.8
WBP11	1904	2.51808e-07	0.359334	3137	0.30114	1970	0.316713	2437	0.0788	753	0.0466257	793	567.923
EZH1	1905	2.5212e-07	0.150816	1697	0.23032	1485	0.211862	1874	0.13838	1835	0.123799	2292	617.173
RBBP4	1906	2.52512e-07	0.148915	1674	0.1816	1064	0.16075	1438	0.16002	2163	0.181517	2796	1321
FLJ22555	1907	2.536e-07	0.10867	1101	0.37994	2366	0.354172	2567	0.1118	1410	0.0775684	1548	403.308
IDS	1908	2.53691e-07	0.418017	3278	0.23508	1530	0.129038	1135	0.13378	1765	0.0747826	1497	4302.19
YWHAH	1909	2.53924e-07	0.365226	3153	0.2006	1229	0.156746	1409	0.13492	1786	0.081951	1645	3856.88
EGLN1	1910	2.54088e-07	0.0374778	73	0.30344	1986	0.226082	1977	0.20436	2649	0.241819	3090	385.5
MRPL12	1911	2.54243e-07	0.558524	3439	0.2034	1257	0.141386	1252	0.1103	1382	0.0717611	1422	804.538
SEMA3C	1912	2.54539e-07	0.170821	1939	0.2301	1483	0.164595	1481	0.1658	2225	0.118662	2234	575.712
APPBP2	1913	2.55046e-07	0.150655	1694	0.3453	2200	0.196283	1763	0.14406	1925	0.0867016	1754	515.038
GUCY1B3	1914	2.55122e-07	0.305676	2959	0.16286	894	0.151005	1343	0.1445	1933	0.117443	2218	1114.17
TLN1	1915	2.55661e-07	0.160724	1822	0.27814	1831	0.205191	1828	0.129	1681	0.108041	2097	365.385
SNX4	1916	2.56772e-07	0.0924921	838	0.39358	2414	0.223452	1959	0.1787	2382	0.0883317	1791	675.365
HADH2	1917	2.56958e-07	0.524606	3412	0.30496	1993	0.14352	1279	0.0938	1064	0.0596605	1148	1100.94
METAP2	1918	2.57039e-07	0.21125	2375	0.26236	1733	0.122954	1068	0.16258	2191	0.116014	2198	446.135
PEPP2	1919	2.57046e-07	0.0862241	740	0.31952	2079	0.222532	1952	0.17766	2373	0.118009	2229	1136.31
ORF1-FL49	1920	2.5761e-07	0.205066	2311	0.31808	2071	0.290001	2334	0.09724	1132	0.0700333	1378	1274.37
MGC17791	1921	2.58058e-07	0.198739	2257	0.185	1099	0.197188	1772	0.12776	1662	0.139316	2473	467.885
SLC30A5	1922	2.58292e-07	0.308413	2972	0.2162	1366	0.162811	1459	0.1551	2086	0.0767083	1531	390.558
MGC10854	1923	2.58602e-07	0.3198	3027	0.4355	2562	0.307884	2406	0.0806	802	0.0374161	539	69.3654
DECR1	1924	2.59126e-07	0.248001	2672	0.3025	1978	0.153541	1377	0.15058	2021	0.074706	1496	684.154
MYD88	1925	2.59764e-07	0.2586	2735	0.21732	1372	0.262252	2186	0.11572	1477	0.0761622	1519	1176.44
DKFZP564D172	1926	2.60291e-07	0.21338	2394	0.15772	850	0.124902	1090	0.17348	2323	0.178491	2777	472.481
VDRIP	1927	2.60495e-07	0.186831	2130	0.51468	2794	0.463131	2833	0.09394	1069	0.0311369	388	183.115
ZNF207	1928	2.6332e-07	0.0431533	121	0.32594	2110	0.255708	2145	0.23092	2828	0.158541	2646	1785.42
NUP88	1929	2.6389e-07	0.572265	3452	0.1928	1170	0.143601	1281	0.0976	1142	0.0853348	1726	314.038
VAMP2	1930	2.64619e-07	0.280625	2854	0.39438	2417	0.23332	2023	0.124	1599	0.0413258	639	2255.21
NS3TP1	1931	2.65655e-07	0.134024	1476	0.2789	1837	0.15063	1340	0.18582	2458	0.126969	2334	550.5
SEC14L1	1932	2.66168e-07	0.121358	1305	0.35958	2267	0.122213	1063	0.243	2893	0.102703	2018	1558.81
FLJ12681	1933	2.667e-07	0.246231	2659	0.308	2021	0.196755	1767	0.1213	1549	0.0736814	1464	314.019
MEIS1	1934	2.67584e-07	0.171284	1947	0.33388	2147	0.334925	2497	0.10302	1241	0.067811	1334	463.635
HCCS	1935	2.67934e-07	0.103202	1009	0.36948	2327	0.306532	2399	0.18664	2469	0.0614162	1186	548.615
GLTSCR2	1936	2.68317e-07	0.527711	3414	0.21426	1350	0.155048	1391	0.11378	1444	0.0672659	1315	4271.13
TRIP15	1937	2.68745e-07	0.180283	2056	0.22078	1400	0.124485	1085	0.1512	2035	0.179379	2782	719.673
FLJ30596	1938	2.69121e-07	0.19968	2262	0.3077	2018	0.0975093	776	0.2095	2688	0.107219	2083	358.5
FBXO34	1939	2.70342e-07	0.0917497	827	0.33318	2143	0.507638	2917	0.10698	1314	0.0814308	1633	1241.44
ZNF146	1940	2.7035e-07	0.124757	1358	0.19786	1211	0.166384	1500	0.17648	2358	0.186514	2830	420.058
SNRPA1	1941	2.70783e-07	0.151272	1702	0.31242	2046	0.212541	1881	0.15284	2058	0.0881984	1785	581.404
MRPS31	1942	2.70921e-07	0.108085	1092	0.4316	2549	0.73082	3206	0.0791	766	0.0502373	906	365.538
FLJ11196	1943	2.73154e-07	0.222664	2475	0.29442	1937	0.152826	1369	0.16126	2177	0.0845439	1708	1630.12
LIMS1	1944	2.73225e-07	0.107948	1088	0.26112	1725	0.177051	1608	0.21592	2741	0.126792	2331	522.308
ATPIF1	1945	2.73291e-07	0.194907	2217	0.39704	2433	0.16335	1466	0.14478	1937	0.0746713	1495	1331.79
TFB1M	1946	2.73765e-07	0.0711807	505	0.3956	2425	0.390558	2675	0.11836	1513	0.105168	2044	465.135
MIR	1947	2.73955e-07	0.12609	1387	0.2929	1924	0.191214	1724	0.1814	2411	0.106939	2079	379.423
TCF7	1948	2.74282e-07	0.10398	1023	0.25206	1654	0.239336	2057	0.18612	2464	0.117478	2220	1517.23
APBB2	1949	2.74622e-07	0.073701	543	0.36528	2301	0.614588	3080	0.0932	1054	0.0890534	1806	1111.02
EIF2C4	1950	2.7504e-07	0.0896786	795	0.59934	2956	0.705446	3180	0.12576	1627	0.0288432	335	315.346
TIP120A	1951	2.7588e-07	0.12444	1353	0.29542	1949	0.145972	1303	0.20352	2643	0.126317	2322	429.423
PELO	1952	2.77737e-07	0.127154	1402	0.31674	2063	0.350563	2552	0.1528	2055	0.0643764	1253	354.192
LOC81558	1953	2.78567e-07	0.191601	2174	0.19526	1189	0.157934	1417	0.15388	2071	0.153206	2584	689.885
FLJ10808	1954	2.79388e-07	0.0729784	529	0.49258	2743	0.115202	992	0.25566	2967	0.131956	2392	301.019
VIP	1955	2.79675e-07	0.353988	3122	0.21234	1336	0.225026	1970	0.0985	1159	0.0839423	1693	77.5385
MGC3234	1956	2.81265e-07	0.262098	2757	0.15806	852	0.16354	1468	0.15324	2062	0.135472	2427	958.096
KIAA1012	1957	2.81598e-07	0.117455	1246	0.51184	2786	0.25111	2118	0.11136	1399	0.0837622	1689	878.846
ZNF451	1958	2.81741e-07	0.154436	1748	0.22818	1461	0.134561	1187	0.17952	2390	0.165503	2688	354.558
SH3GLB1	1959	2.82612e-07	0.309699	2980	0.32478	2103	0.130239	1151	0.13728	1815	0.0785831	1566	1648.52
NEURL	1960	2.83416e-07	0.0796396	635	0.3742	2341	0.415596	2736	0.12824	1671	0.0892303	1807	699.596
RPS19	1961	2.8348e-07	0.349962	3111	0.25512	1679	0.160389	1433	0.13964	1854	0.0708904	1397	7363.13
POLH	1962	2.83847e-07	0.429833	3301	0.2551	1678	0.292044	2340	0.0912	1003	0.0486011	854	76.7885
GLS	1963	2.83965e-07	0.294307	2922	0.23398	1523	0.104232	848	0.17468	2337	0.113255	2158	2977.87
RGS12	1964	2.865e-07	0.0471887	162	0.32874	2124	0.246013	2093	0.19324	2545	0.194265	2880	663.481
NDUFA3	1965	2.87052e-07	0.38215	3203	0.21574	1360	0.155877	1400	0.12122	1548	0.0921414	1850	2422.1
TIMM17A	1966	2.8864e-07	0.215758	2414	0.33564	2156	0.0817488	588	0.22264	2791	0.109508	2112	950.365
ITPK1	1967	2.91037e-07	0.137583	1534	0.37364	2340	0.194095	1742	0.102	1216	0.142999	2510	2618.17
GSTO1	1968	2.91237e-07	0.60353	3466	0.2138	1347	0.11541	997	0.12004	1529	0.0814677	1635	3282.85
PILRA	1969	2.9193e-07	0.210446	2367	0.223	1417	0.176462	1604	0.15004	2006	0.117487	2221	224.635
AB026190	1970	2.92698e-07	0.0557323	278	0.35094	2223	0.364731	2598	0.13756	1822	0.149153	2551	531.538
ISGF3G	1971	2.92707e-07	0.161468	1830	0.40304	2448	0.288065	2319	0.16236	2187	0.0480889	840	850.827
MGC61571	1972	2.92931e-07	0.240949	2618	0.27524	1806	0.0994902	796	0.20634	2662	0.107592	2090	325.519
LATS1	1973	2.93699e-07	0.172982	1971	0.2771	1824	0.195905	1761	0.1391	1847	0.112436	2146	202.808
PICALM	1974	2.94678e-07	0.0951852	881	0.24936	1632	0.171609	1561	0.20898	2680	0.17311	2744	1032.02
PNPT1	1975	2.96296e-07	0.101455	986	0.4526	2630	0.194867	1750	0.18654	2468	0.0887656	1799	793.788
GSK3B	1976	2.96522e-07	0.08538	724	0.32046	2086	0.321004	2453	0.14356	1919	0.117598	2223	588.596
ZNF43	1977	2.96607e-07	0.107028	1074	0.34648	2205	0.374974	2629	0.13704	1811	0.0778347	1552	529.519
ZFP106	1978	2.96787e-07	0.172804	1969	0.20454	1268	0.140968	1250	0.1494	1996	0.199368	2905	1044.1
BAG1	1979	2.96814e-07	0.0500265	205	0.47362	2691	0.24306	2080	0.1762	2356	0.146268	2535	1427.67
LDHA	1980	2.97361e-07	0.0622027	375	0.27496	1803	0.160144	1431	0.2692	3026	0.201667	2920	4399.67
ZNF44	1981	2.97986e-07	0.127221	1405	0.23514	1531	0.184789	1677	0.183	2431	0.147299	2538	454.442
SNRP70	1982	3.00079e-07	0.127896	1413	0.31116	2038	0.225739	1975	0.17556	2346	0.0951432	1903	2133.13
WBSCR22	1983	3.00715e-07	0.2478	2670	0.25906	1712	0.367041	2603	0.08088	806	0.0789069	1574	1000.44
STCH	1984	3.01597e-07	0.322676	3036	0.22362	1421	0.14519	1290	0.17732	2368	0.0811843	1623	363.308
LRRC5	1985	3.01858e-07	0.156609	1775	0.56986	2901	0.766634	3230	0.07684	701	0.0287116	327	847.788
MGC3222	1986	3.02848e-07	0.0955424	885	0.26432	1748	0.259003	2161	0.14984	2004	0.154519	2596	901.462
ADAM10	1987	3.04758e-07	0.195356	2226	0.2086	1301	0.176065	1597	0.17742	2370	0.119716	2249	699.981
CKAP4	1988	3.05272e-07	0.0874326	764	0.28472	1874	0.282346	2296	0.18374	2439	0.118202	2231	892.692
EFG2	1989	3.05592e-07	0.0146116	1	0.52408	2816	0.271646	2239	0.30092	3131	0.244122	3098	788.712
LANCL1	1990	3.05717e-07	0.156789	1778	0.2369	1545	0.132521	1170	0.1911	2526	0.16252	2664	2177.25
PAI-RBP1	1991	3.05963e-07	0.148317	1668	0.25766	1701	0.189552	1708	0.16584	2226	0.127358	2341	1618.02
PLXDC1	1992	3.06287e-07	0.0316983	46	0.30208	1976	0.268998	2224	0.2162	2743	0.275032	3184	461.635
LUC7A	1993	3.06742e-07	0.29017	2906	0.27156	1785	0.0639142	373	0.21614	2742	0.140909	2493	1282.1
ZNF148	1994	3.08047e-07	0.164002	1855	0.1943	1180	0.138852	1231	0.18744	2480	0.185736	2824	549.538
PORIMIN	1995	3.0883e-07	0.232276	2548	0.36158	2278	0.357023	2579	0.16508	2217	0.0311987	390	617.308
FLJ13576	1996	3.09494e-07	0.223709	2481	0.35874	2261	0.273047	2248	0.10122	1203	0.0697752	1373	178.288
ECHS1	1997	3.09986e-07	0.779111	3534	0.20162	1240	0.300199	2372	0.0668	521	0.0492083	883	3744.06
CANX	1998	3.10412e-07	0.146738	1651	0.23888	1561	0.139394	1236	0.18766	2487	0.169284	2713	3932.79
RPL35	1999	3.10489e-07	0.35198	3115	0.40846	2473	0.739888	3215	0.05958	394	0.0244978	240	5739.73
[truncated: 1,557 more rows]
